# Supplementary material for: Extension of cortical synaptic development distinguishes humans from chimpanzees and macaques
Source: HighWire-hosted journal article supplement (doi:10.1101/gr.127324.111), 2012-02-02
Supplement: Supplementary_information.pdf [file Supplementary_information.pdf]

## **Supplementary information**

### **Extension of cortical synaptic development distinguishes humans from chimpanzees and macaques**

#### **Supplementary Methods**

##### **Sample collection**

We used prefrontal cortex (PFC) and cerebellar cortex (CBC) samples from postmortem brains of 33 human (aged 0-98 years), 14 chimpanzee (aged 0-44 years) and 44 rhesus macaque individuals (aged 0-28 years) (Table S1). Human samples were obtained from the NICHD Brain and Tissue Bank for Developmental Disorders at the University of Maryland, USA, the Netherlands Brain Bank, Amsterdam, Netherlands and the Chinese Brain Bank Center, Wuhan, China. Informed consent for use of human tissues for research was obtained in writing from all donors or their next of kin. All subjects were defined as normal by forensic pathologists at the corresponding brain bank. All subjects suffered sudden death with no prolonged agonal state. Chimpanzee samples were obtained from the Yerkes Primate Center, GA, USA, the Anthropological Institute & Museum of the University of Zürich-Irchel, Switzerland and the Biomedical Primate Research Centre, Netherlands (eight Western chimpanzees, one Central/Eastern and five of unknown origin). Rhesus macaque samples were obtained from the Suzhou Experimental Animal Center, China. All non-human primates used in this study suffered sudden deaths for reasons other than their participation in this study and without any relation to the tissue used. CBC dissections were made from the cerebellar cortex. PFC dissections were made from the frontal part of the superior frontal gyrus. All samples contained an approximately 2:1 grey matter to white matter volume ratio.

##### **RNA microarray hybridization**

RNA isolation, hybridization to microarrays, and data preprocessing were performed as described previously (Khaitovich et al. 2005). In brief, total RNA was extracted from 100 mg of dissected CBC and PFC samples (humans, n=22/23; chimpanzees, n=12/12;

macaques, n=24/26, respectively; see Table S1) using Trizol reagent (Invitrogen), and purified with the QIAGEN® RNeasy MiniElute kit. RNA quality was assessed with the Agilent® 2100 Bioanalyzer system (Table S1). For each sample, 2 µg of isolated RNA was hybridized to an Affymetrix® Human Gene 1.0 ST array. For human and rhesus macaque samples, the microarray experiments were carried out in two batches, with similar age distributions of subjects across batches (Table S1); in total, the hybridizations were performed in five batches per brain region: human1, chimpanzee, rhesus1, human2, rhesus2. To estimate technical variance, gene expression in two individuals in human PFC and CBC sets, and three individuals in the rhesus PFC set, were measured in technical replicates (Table S1). The 12 macaque prenatal/neonatal PFC samples were measured together following the above mentioned procedure (Table S1).

### **Microarray data preprocessing**

All Affymetrix microarray probes (N= 693,765) were aligned to the reference human, chimpanzee and rhesus genomes (hg18, panTro2, and rheMac2, respectively) downloaded from the UCSC Genome Browser database, using BLAT (Karolchik et al. 2008). Among them, 680,139, 508,073, 241,363 are uniquely and perfectly mapped on human, chimpanzee, and rhesus macaque genome, respectively. 209,310 probes are perfectly and uniquely mapped to all three genomes. These probe annotation is available at [http://www.picb.ac.cn/Comparative/data\\_ms\\_age\\_divergence\\_2010.html](http://www.picb.ac.cn/Comparative/data_ms_age_divergence_2010.html).

To check how the location of probes within genes might be affected by the above masking process, we assigned probes into CDS, 5'UTR, 3'UTR categories, by mapping probes to each human transcript (Ensembl, version 54), using Bowtie (Langmead et al. 2009). If a probe was mapped to different categories based on different transcripts of a certain gene, it was preferentially assigned to the CDS, and secondarily to the 5'UTR or 3'UTR categories. Importantly, genes showing human-specific developmental expression had similar probe location distributions across gene regions, such as CDS, 5'UTR and 3'UTR, as other genes expressed in the brain (Figure S3, and Table S6). Specifically, there were no significant differences in probe location among genes in the 5 PFC modules, in the 2 CBC modules, all genes detected in PFC or CBC, or all age-related genes found in PFC or CBC (Wilcoxon test, all  $p>0.05$ ).

Probe intensities were exacted using R package “affy” (Gautier et al. 2004). Probe intensities were then corrected for background,  $\log_2$  transformed and quantile normalized. To detect expressed transcripts in each brain region, the following criteria were used (Fu et al. 2009; Somel et al. 2010): (1) for each sample in each species, we only considered probes that perfectly and uniquely mapped to the corresponding genome. If the expression level for a certain probe is higher than the 95% percentile of the control probes with the same GC content, it was considered as detected in this sample. (2) In each sample, a transcript was considered detected if it contained >7 detected probes and more than half of the probes were detected. (3) In each species, a transcript, detected in more than 25% samples, was considered as detected in this species. (4) For each detected transcript, we determined the probes detected in at least one species that uniquely and perfectly mapped to all three species’ genes. These probes were used to calculate intensity values as the expression value for this transcript, using median polishing (Gautier et al. 2004) (Hubbard et al. 2007) (<http://www.ensembl.org>). We then chose one Ensembl gene per transcript; if a gene corresponded to multiple transcripts, we chose the one with highest mean expression level. The PFC dataset of postnatal individuals (n=61) and the PFC prenatal/neonatal macaque dataset (n=12), were preprocessed separately. To combine these two datasets, for each gene measured in both, the expression level in the PFC prenatal/neonatal macaque dataset were normalized by a linear transformation that equated both the mean expression values and standard deviations between the 6 neonatal macaques in this dataset and the 14 neonatal macaques with age < 3 years in the PFC postnatal dataset.

### **RNA sequencing (RNA-seq)**

To generate the first RNA-seq dataset, we prepared three human samples (newborn, young, old), two chimpanzee samples (newborn, young), and 2 rhesus samples (newborn, young) using pooled total RNA from PFC and CBC of five individuals (Table S1). Total RNA was isolated using Trizol® reagent (Invitrogen, Carlsbad, CA). Oligo(dT) selection was performed twice using Oligotex® mRNA Midi Kit (Qiagen). After selection, 100 ng mRNA was first fragmented by addition of 5X fragmentation buffer (200 mM Tris acetate, pH 8.2, 500 mM potassium acetate and 150 mM magnesium acetate) and heating

at 94 °C for 2 min 30 s in a thermocycler, then transferred to ice and run over a Sephadex-G50 column (USA Scientific) to remove the fragmentation ions (Mortazavi et al. 2008). We used random hexamer primers (Invitrogen, Cat. No. 48190-011) for reverse transcription of fragmented mRNA to double-strand cDNA. Sequencing libraries were prepared according to the paired-end sample preparation protocol (<http://www.illumina.com>). Each sample was sequenced in a separate lane in the Illumina® Genome Analyzer II system, using the 75-bp paired-end sequencing protocol.

For the second RNA-seq dataset, RNA libraries were constructed according to the Illumina strand-specific RNA-seq library preparation procedure for 14 human, and the Illumina non strand-specific RNA-seq library preparation procedure for 14 chimpanzee and 15 macaques (Table S1). Briefly, total RNA was isolated using the Trizol® reagent (Invitrogen, Carlsbad, CA). We then performed two round selection using Sera-Mag® Magnetic oligo(dT) beads (Thermo scientific). 100 ng poly(A)-selected RNA was first fragmented by 5X fragment buffer (Illumina) and then reverse transcribed to cDNA using random primers (Invitrogen, Cat. No. 48190-011). After reverse transcription and 15 cycles of amplification, the cDNA was ligated to 3' and 5' adaptors following the corresponding Illumina library preparation procedure. Libraries were sequenced in a separate lane in the Illumina® Genome Analyzer II system to a length of 100-bp.

We obtained 11-15 million read pairs per sample in the first dataset and 16-39 million reads per sample in the second sample dataset (Table S7). The raw sequence reads were mapped to the reference genomes (hg19, panTro2, and rheMac2), allowing a maximum of four mismatches using the “Tophat” program (<http://tophat.cbcb.umd.edu/>) (Trapnell et al. 2009) for the first dataset and allowing a maximum of three mismatches using “Bowtie” program (Langmead et al. 2009) for the second dataset. Only uniquely mapped reads were used in downstream analysis. Human gene annotation was downloaded from Ensembl (v56; <http://www.ensembl.org>). Chimpanzee and rhesus macaque gene annotations were constructed from human gene annotation using the UCSC “LiftOver” tool (<http://www.genome.ucsc.edu/cgi-bin/hgLiftOver>). Gene annotations were filtered to only include transcripts with similar size in all three species (i.e. the difference in transcript length between species is less than the length of the shorter transcript). For the

first dataset, normalized transcript expression levels were calculated using the “Cufflinks” program (<http://cufflinks.cbc.umd.edu/>), employing the mapping result from “Tophat” and conserved exon annotation from “Liftover” software (Trapnell et al. 2010). If a gene contained more than one transcript, the expression value of the longest one was chosen as representative. For the second dataset, the read coverage for each conserved exon was calculated based on the mapping result from “Bowtie”. Exons with at least one read supported in more than half of the samples for each species were considered as expressed exons. We then divided all exons that could be reciprocally mapped among species into two categories: constitutive exons - exons present in all transcripts of a given gene, based on human Ensembl annotation (v56), and alternative exons - exons absent in some of the gene’s transcripts. For brevity, exons partially present in other transcripts were also considered to be present in this transcript. To avoid any influence of alternative splicing or exon usage on our gene expression estimates, we then removed all exons with low or variable inclusion frequency in each of the three species. Specifically, we first calculated the inclusion ratio for each alternative exon as the average nucleotide coverage within an exon, divided by the average nucleotide coverage within the expressed constitutive exons of the corresponding gene:

$$inclusion\ ratio = \frac{cov(exon)/length(exon)}{cov(gene)/length(gene)}$$

Only the constitutive exons and alternative exons with an inclusion ratio greater than 0.5 in more than 10 individuals within each of the 3 species were then used in gene expression level calculations. Gene expression levels were calculated by normalizing the read coverage by each gene’s length, and the total number of reads mapped to genes, per sample.

### **Identifying response genes upon neuronal activation**

The culture of cortical neurons, RNA isolation, hybridization to microarrays, data preprocessing and analysis were performed as described in (Flavell et al. 2008). In brief, cortical neurons isolated from 15-day-old embryo mouse (C57bl/6) were cultured in vitro for 12 days, at which stage they are undergoing extensive synaptic development changes and form mature neuronal network in vitro. To identify genes that are responsive upon

neuronal activation, we exposed neurons to 25uM extracellular bicuculline (Bic), a specific GABAA receptors blocker, or 50mM potassium chloride (KCl) for 6 hours, which all lead to strong neuronal activation and membrane depolarization. Using Agilent whole mouse genome oligo microarray (4x44k), we measured the gene expression profile of cultured neurons under either stimulus or without stimulus (control). Three biological replicates were performed for each group. Arrays were scanned by a DNA microarray scanner (Agilent G2565BA). The Agilent G4462AA Feature Extraction software (v10.5.1.1) was used for image analysis with default settings to get the probe intensities. The probe intensities were further  $\log_2$  transformed and quantile normalized.

To identify the probes that show different expression profiles between stimuli and control, probes under  $p < 0.05$  (t-test) and 2 times fold-change were selected. All probes were mapped to the mouse Ensembl gene ID. The mouse Ensembl gene IDs represented on the array was then transformed to orthologous human gene ID, using the Ensembl human-mouse ortholog annotation (version 56).

### **Standardization of expression levels across species**

In order to compare age-expression profiles across species, without the influence of mean expression level differences (Figure S1A), we standardized expression profiles in each species, taking into account the differences in the sample age distribution among species. Our standardization procedure additionally aimed to exclude possible batch effects (caused by array hybridizations at different times). For the microarray datasets, we used the following procedure: (i) We standardized expression levels of each batch in each species to mean = 0 and standard deviation = 1. For the two macaque batches, the normalization was based on individuals with overlapping ages, as the age distribution of the two batches were slightly different. (ii) We chose sample subsets consisting of 10 individuals within each species, using both the stage-of-life matched approach and the chronological matched approach (Figure S1C-D). In the stage-of-life matched subsets, a similar age distribution across the lifespan of each species was required, using 40, 60 and 120 years as maximum lifespan for macaques, chimpanzees and humans, respectively (de Magalhães and Costa 2009). In the chronological matched subsets, calendar matched ages were used for each species. (iii) We standardized the mean and standard deviation

across the three species based on these subsets: for each gene, for each species, we subtracted the 10 individuals' mean from all individuals' expression levels, and divided the result by the 10 individuals' standard deviation. In cases where gene expression was measured twice in the same individual as technical duplicates, we randomly chose and removed one of the duplicates in the downstream analyses. To include the PFC prenatal/neonatal macaques dataset into standardized PFC postnatal dataset, for each gene measured in both, the expression level in the PFC prenatal/neonatal macaque dataset were normalized by a linear transformation which equated both the mean expression values and standard deviations between the 6 neonatal macaques in prenatal/neonatal macaques dataset and the 14 neonatal macaques with age < 3 years in the standardized PFC postnatal dataset.

### **Age scale**

For all analyses we used a  $\log_2$  transformed age scale: *i.e.*  $\log_2(\text{days of age}+1)$ , as one chimpanzee was 0 days old. Log-transformation of age is a common procedure to ensure efficient and accurate modeling of developmental changes where the rate of change in the dependent variable, expression level, decreases with increasing age (Clancy et al. 2001; Lu et al. 2001; Shupe et al. 2006). Compared to the use of the linear age scale, this transformation yields a relatively uniform error distribution across samples (Sokal and Rohlf 1995). For calculating developmental timing shifts between species (see below), we used the following gestation time estimates for species: 280 days, 220 days and 165 days for humans, chimpanzees and macaques, respectively (de Magalhães and Costa 2009).

### **Age-test and differential expression tests**

To choose age-related genes, we tested the effect of age on expression levels using polynomial regression models, as described previously (Somel et al. 2009). Briefly, for each gene, we choose the best polynomial regression with age as predictor and expression level as response, using families of polynomial regression models and the “adjusted  $r^2$ ” criterion (Faraway 2002). The most complex of these models is defined in the formula:

$$Y_{ij} = \beta_{0i} + \beta_{1i} A_j + \beta_{2i} A_j^2 + \beta_{3i} A_j^3 + \epsilon_{ij},$$

where  $Y_{ij}$  is the expression level for gene  $i$  and subject  $j$ ,  $A_j$  is the age of the subject  $j$ , and  $\varepsilon_{ij}$  is the error term. Alternative models are the above models' subsets, including linear and quadratic ones. The significance of the chosen regression model was estimated using the F-test, and the false discovery rate (FDR) was calculated by 1,000 random permutations of age across samples (Table S3). The median of the permutation distribution was used as the null expectation. Each species was tested independently. For both the PFC and CBC datasets, age-related genes were defined as those showing significant age-effect in at least one species. In the analyses using subsets of 10 individuals per species, to make the analysis more conservative, we defined age-related genes as those showing significant age-effect in all three species.

The test for differential expression between a pair of species is based on analysis of covariance, or ANCOVA (Faraway 2002), described in (Somel et al. 2009). Briefly, the test aims to identify whether two species have different curves for expression change with age, or not. First, one of the two species is selected as reference. For each age-related gene, we use the polynomial regression model chosen in the above-described age-test (for the reference species). We then test if such a regression model, but with species-specific parameters, is significantly better than the model with common parameters for both species, given the expression-age distribution of the two species. For example, in a comparison of human and chimpanzee, if the null model for gene  $i$  was a linear one:

$$Y_{ij} = \beta_{0i} + \beta_{1i}A_j + \varepsilon_{ij},$$

we compare it to the alternative model:

$$Y_{ij} = \beta_{0iC} + \beta_{0iH} + \beta_{1iC}A_{jC} + \beta_{1iH}A_{jH} + \varepsilon_{ij},$$

where  $Y_{ij}$  is the expression level of individual  $j$ ,  $\beta_{0iC}$  and  $\beta_{1iC}$  are the chimpanzee-specific intercept and slope,  $\beta_{0iH}$  and  $\beta_{1iH}$  are the human-specific intercept and slope,  $A_{jC}$  and  $A_{jH}$  are chimpanzee and human ages, respectively. The null model (with no species-specific parameters) and alternative models are compared using the F-test. We test each sub-model of the full alternative model, each containing one or more species-specific parameters. Note that applying the differential expression test using ages normalized for lifespan differences between species, does not alter our results (i.e. the excess of human-specific genes in the PFC compared to CBC; data not shown). The R language code can



for the age- and differential expression tests can be found at [http://www.picb.ac.cn/Comparative/data\\_methods/neoteny/somel\\_R\\_functions\\_1.r](http://www.picb.ac.cn/Comparative/data_methods/neoteny/somel_R_functions_1.r).

The permutation is performed by dividing the age-range into 10 sections, and randomly permuting species identifiers among samples within each section, in order to preserve the age-structure in the data. FDR was calculated by 1,000 random permutations of species identifiers (Table S3).

To identify species-specific genes, the differential expression test is performed on each species pair twice, using either species as a reference. For each gene, if either of the two tests was significant at a defined cutoff, we considered this gene as differentially expressed between these two species. If a gene showed no significant differential expression between chimpanzees and macaques, but significant differential expression between humans and the other two primate species, this gene was assigned to the human-specific gene set. Chimpanzee- and macaque-specific genes were defined by the analogous criteria. To avoid any bias due to the unequal sample size and sample age distribution among the three species, we used the subsets of 10 individuals per species (described above; Figure S1C-D). The numbers of overlapping of species-specific genes between this 30-individuals dataset and the full dataset, as well as between PFC and CBC, are shown in Table S4.

### **Interpolation of expression curves**

Here, for each gene, for each species, we interpolated expression values at 15 equally distributed points along the species' age range, from birth until old age: 0-80 years for human; 0-40 years for chimpanzee; 0-28 years for rhesus macaques. These ranges were chosen to cover two thirds of maximum lifespan in each species (based on (de Magalhães and Costa 2009)), given the fact that the oldest macaque individual used in our analyses is 28 years old. We used cubic spline regression for interpolation, restricting the fit to three degrees of freedom, in order to avoid over-fitting.

### **Human-specific expression modules**

For defining modules, we first constructed dendrograms of species-specific genes by hierarchical clustering, using the Pearson correlation coefficient ( $r$ ) between expression curves of pairs of genes as the distance measure (*i.e.*  $1-r$ ). The correlations were

calculated based on expression profiles of all three species. To ensure equal power across species, we used interpolated expression levels for each species (described above). We used the “complete” method for hierarchical clustering and cut the tree at a height determined by manual examination of cluster profiles and by observing cluster functional properties at different levels ( $h=1.5$ ; Figure S2A-B). Within each group, we only retained genes with median Pearson correlation coefficient  $>0.5$  to the others genes, in all three species. We discarded groups containing  $<20$  genes yielded 5 PFC and 2 CBC modules with strong within-group correlations. Genes assigned to the modules are listed in Table S5.

We note that, in the PFC analysis, dividing the hierarchical clustering tree into two main clusters, or using k-means clustering with two subgroups, yields gene sets where one set has similar profile and functional properties as PFC module 1 (data not shown). This indicates that the exact parameters used for clustering have limited effect on our results for PFC module 1 genes.

### **Functional enrichment analysis**

Kyoto Encyclopedia of Genes and Genomes (KEGG) pathway annotation (Kanehisa et al. 2008) and Gene Ontology (GO) annotation (Ashburner et al. 2000) for human were downloaded from KEGG (<http://www.genome.jp/kegg/>) and Ensembl (v54) databases, respectively. We used the GO “term” and “graph path” tables downloaded from the GO database (<http://archive.geneontology.org/latest-termdb/>) to associate each GO term with higher terms. To identify overrepresented KEGG pathways or GO terms, we used the hypergeometric test, and adjusted  $p$ -values for multiple-testing by Bonferroni correction. Only pathways/terms containing  $\geq 5$  genes were tested. Enrichment analysis of cell type-specific genes was performed as described previously (Somel et al. 2009). Briefly, we used 1,155 and 578 human Ensembl genes described to be enriched in gray- and white-matter, respectively, in a published experiment from the human frontal cortex (Erraji-Benchekroun et al. 2005). For the cell-type analysis, we used expression levels measured from purified mouse neurons, astrocytes and oligodendrocytes (Cahoy et al. 2008). We defined 1116, 965, and 991 human-mouse one-to-one orthologs (based on Ensembl v54) as neuron-, astrocyte- and oligodendrocyte-specific, using an effect size cutoff equal to 2.

## Metabolite analyses

Metabolite data in PFC of 50 humans, 12 chimpanzees and 49 rhesus macaques measured using gas chromatography mass spectrometry (GC-MS) were from (Fu et al. 2011). Samples from almost all individuals were measured in duplicates. As the vast majority of metabolites in macaque show long-term stability (Fu et al. 2011), we included all detected metabolites and all individuals with or without technical replicates in this study. In detail, metabolites with >35% missing values across all individuals were removed. The remaining missing values were predicted using R package “EMV”. The dataset was  $\log_2$  transformed and quantile normalized. This yielded 151 metabolites with reliable detection levels (excluding spike-in controls and  $^{13}\text{C}$ -sorbitol, which was used for standardization). Among the 151 metabolites, 6 are classified as neurotransmitters in the “neuroactive ligand-receptor pathway” in the KEGG database. We standardized the mean and standard deviation based on 10 individuals per species (with similar age distribution across each species’ lifespan). We tested all 151 metabolites for human-specific profiles using the ANCOVA test for differential expression, as described above, using the mean per replicate where possible. Seventeen metabolites were identified as human-specific, 3 of which were among the 6 neurotransmitters. For these 3 neurotransmitters, in order to test whether the human points in development are significantly different from the others, we firstly combined individuals with similar ages to four groups (0-1 month; 1 month-1 year; 1-10 years; >10 years) to reduce individual variation. We then used the z-test to estimate difference between human-macaque or human-chimpanzee comparison, by interpolating the chimpanzee/macaque curve and using the human variance across the human spline curve. We found that in the youngest age group (0-1 month) human points were lower than chimpanzee and macaque ( $p < 0.001$  for glutamate and aspartate;  $p < 0.1$  for GABA human-macaque comparison).

## Estimating time-shift by dynamic time warping

We used a modified dynamic time warping algorithm, DTW-Significance (DTW-S) algorithm, to estimate the time shifts between the time series expression curves of two species (Yuan et al. 2011). The R package “*TimeShift*” for DTW-S is available at <http://www.picb.ac.cn/Comparative/data.html>. Briefly, the input for the algorithm

consists of two time series expression data with samples of possibly different size and age distribution between the two species. An alignment between the two time series assigns each point in one time series to another point in the other time series with the maintenance of their respective age orders. By searching the space of all such alignments (with a subset size constraint) between the two time series, the method selects the alignment with minimal expression level differences, and reports the corresponding age differences as the estimation of time shifts for each point between the two time series. For implementing this algorithm in this analysis, the gene expression curve alignments were carried out by sampling 20 values among 40 time points interpolated along the fitted spline curve in one species with longer lifespan (with subset size constraint of 20) and calculating the distance to the 20 time points interpolated along the fitted spline curve in the other species with shorter lifespan. For each gene in each pair of species, the alignment with the minimal distance was chosen as output. For this procedure, we interpolated cubic spline curves (degrees of freedom=3) using estimated conception ages and the interpolated curves ranged from rhesus macaque birth age to each species' maximum lifespan. To ensure efficient mapping between expression curves, whenever there was a minimum or maximum predicted point in the expression profiles, we used that point as the first point in the estimation procedure (under the assumption that peak ages correspond to the same biological age among species; see Figure 3A). Otherwise, we used macaque birth age as the first point in the estimation. For each module, we estimated the time shift for each gene separately, calculated the average shift for that module and estimated variance by randomly resampling among module members with replacement 1,000 times. For comparison, we also estimated the shift for each age-related gene in PFC and CBC and randomly sampled gene sets with the same number of genes as the respective module, 1,000 times. For each of the 20 time points, the quantile value of the average shift for a specific module with respect to the distribution of the above 1000 random sampling shifts was recorded. We calculated an estimated  $p$ -value by (1-the mean value of the 20 quantile values) to assess the statistical significance of the module shift against random background. For Figure 3B, we estimated the shift for human and chimpanzee brain volume growth using the same procedure. Specifically, we used data from (Leigh 2004) and converted these volume measurements into percentages by

dividing them by the adult brain volume. We then applied the dynamic time warping algorithm to these volume percentage estimates.

### **TF binding site enrichment analysis**

The conserved TF binding sites (TFBS) were estimated as follows: Promoter regions (+/- 2,000 bp around the transcription start site) for each gene were extracted based on the gene annotation from Ensembl (v54). Predicted TFBS in each promoter were identified using the Match™ algorithm, employing the TFBS sequences from the TRANSFAC® database (Kel et al. 2003). The average Phastcons scores of each predicted TFBS were calculated using the UCSC Genome Browser 17-way vertebrate Conserved Element Table (Siepel et al. 2005). We defined conserved TFBS as those for which  $\geq 80\%$  of nucleotides had Phastcons scores and the average score was  $\geq 0.6$ . For each conserved TFBS, we used the hypergeometric test to check whether there was an excess of TFBS in species-specific modules, compared to all age-related genes in that brain region. The enriched TFBS were defined at  $p\text{-value} < 0.05$ . We further estimated the expected-by-chance number of TFBS enriched at this significance cutoff by randomly sampling the same number of age-related genes as within the tested module, and repeating the enrichment test 1,000 times.

The TFs with enriched TFBS were then tested for correlation with their targets in corresponding Module in terms of their expression profiles. The TF-target correlations were compared to correlations between the same TF and its age-related targets outside the Module, using the Wilcoxon test. The test was conducted using all three species' expression profiles, as well as taking each species' expression profile separately.

### **Evolutionary conservation analysis**

For estimating conservation of protein coding sequence, we used human-mouse dN/dS ratios downloaded from the Ensembl database (v55). For estimating promoter conservation, we used the PhastCons 18-way Placental Mammal Conservation Track (a subset of the 28-way Placental Track) from the UCSC Genome Browser (Siepel et al. 2005). For each Ensembl gene, we computed mean PhastCons score per proximal promoter (+/- 2,000 bp around the transcription start site (Xie et al. 2005)). For genes

with multiple transcripts, we chose the one with the highest number of exons. To estimate the basal mutation rate per gene, we used intronic conservation (excluding first introns, excluding 100 bp around each splice site, and considering only 2,500 bp at each end of an intron (Haygood et al. 2007)). When comparing gene sets, for each gene, we used the promoter conservation measure divided by the intron conservation measure. For polymorphism analysis, we used 1,236,401 Perlegen “type A” SNPs, which were discovered by re-sequencing in a panel of African Americans and European Americans (Hinds et al. 2005). The SNP locations were mapped from human genome version hg16 to hg19 locations using the UCSC Genome Browser “LiftOver” tool (<http://www.genome.ucsc.edu/cgi-bin/hgLiftOver>). We compared genes by the number of Perlegen SNPs per proximal promoter defined as defined above. In the results presented in the main text and Figure S6B-D, we compared specific module members with all 8,613 age-related genes using the Wilcoxon test.

### **Western blot analysis**

Western blot were performed as described elsewhere (Glantz et al. 2007). In brief, samples with equal amount of total protein (15 µg for synaptophysin and 20 µg for PSD95) were separated by 10% Mini-PROTEAN TGX gel and transferred onto PVDF membrane (Cat. RPN303F, GE Healthcare). After transfer, wash the membrane with PBS for 5 minutes at room temperature. The membrane was then blocked with blocking buffer (5% BSA mixed in PBS containing 0.1% Tween 20 (PBST)) overnight at 4°C. The membrane was then incubated at room temperature for 2 h in blocking buffer with primary antibodies as follows, mouse anti-SYP (s5768, Sigma, 1:3000), rabbit anti-PSD (#3450, Cell Signaling, 1:800), mouse anti-β-actin (A5441, Sigma, 1:5000) or rabbit anti-β-tubulin III (T2200, Sigma, 1:3000). The actin and tubulin were used as controls for DLG4 and synaptophysin, respectively, to ensure the equal amounts of protein was loaded in each lane. After being washed three times with PBS-T, the membrane was incubated with HRP-conjugated anti-mouse secondary antibody (#7076, Cell Signaling, 1:8000) or HRP-conjugated anti-rabbit antibody (#7074, Cell Signaling, 1:8000) for 45 min at room temperature. Then the membrane was washed three times with PBS-T, and developed with Luminol/enhancer and peroxide buffer solution (Immun-Star HRP

Substrate,170-5041, Bio-Rad) as recommended by the manufacturers. The immunoreactivity was visualized with Fujifilm LAS-4000 system. PSD95 and actin, or synaptophysin and tubulin, from samples in each species in each tissue were processed in the same membrane and visualized in the same condition to minimize experimental variation. The integrated optical density (IOD) of each band was measured by the Gel-Pro Analyzer.

### **Positive selection analysis**

The analysis of positive selection on the human evolutionary lineage after the separation from the Neanderthal lineage was carried out following (Green et al. 2010). Specifically, the human SNPs data from 5 modern humans, human reference genome and 6 Neandertal samples were downloaded from UCSC (<http://genome.ucsc.edu/Neandertal/>). The SNPs were classified as modern human derived, when at least four of the six modern human genomes showed derived allele, while all observed Neanderthal alleles were ancestral, using chimpanzee genome as outgroup. An overrepresentation of such SNPs in a genomic region beyond random expectation would imply that the region had undergone positive selection in the modern human lineage since divergence from Neanderthals (Green et al. 2010). The analysis was done using a sliding window approach with window size of 50 kb moved by 10 kb steps across the human genome.

## Supplementary figures

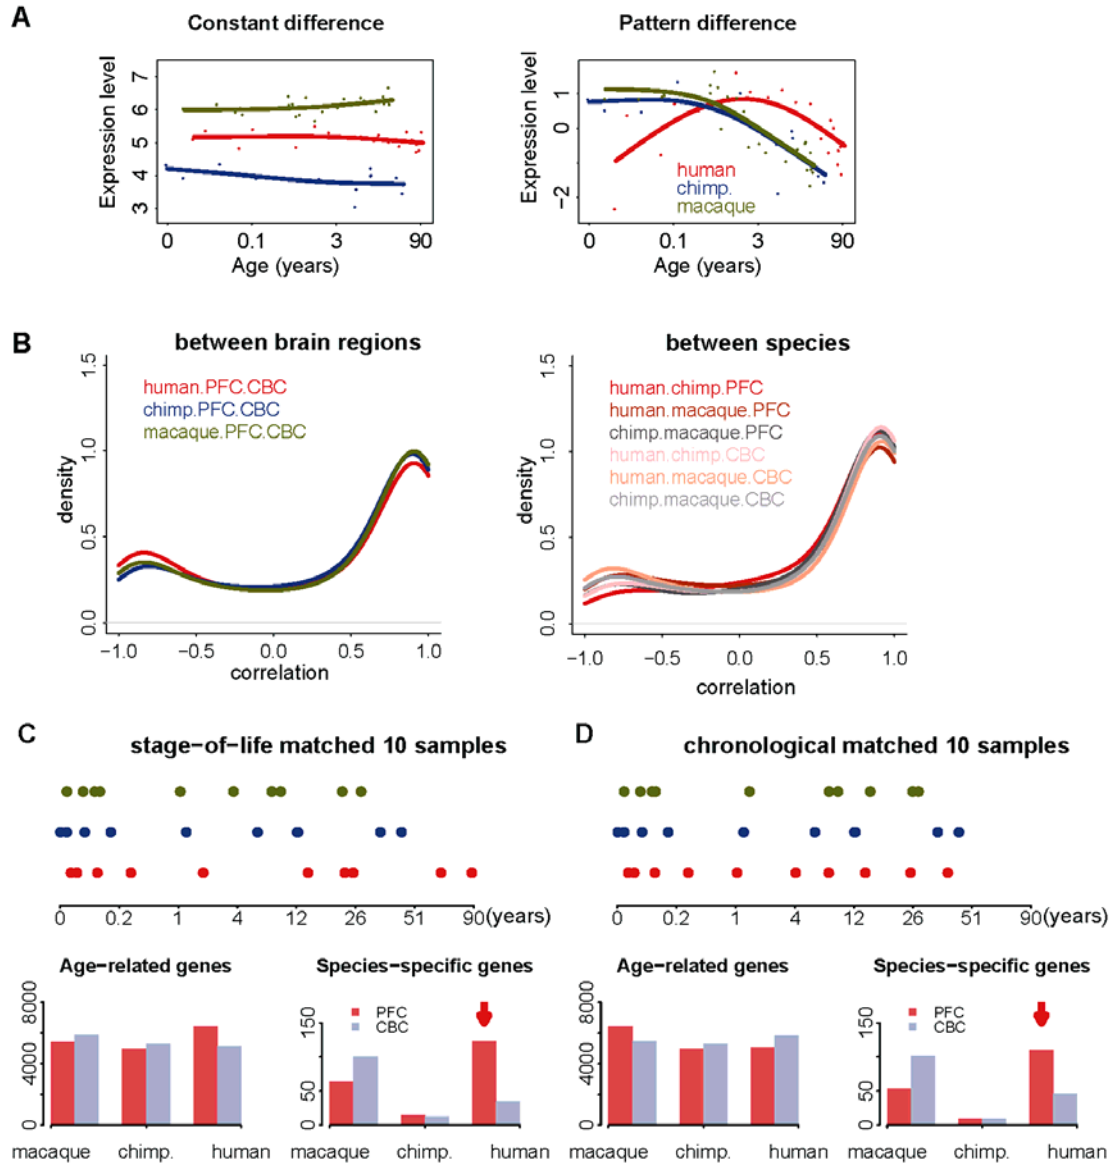

**Figure S1. Age-related gene expression change between different brain regions or different species, or using 10 species subsets.**

(A) Examples of constant and pattern differential expression. Two examples of differential expression, reflecting expression level differences among species that are constant with age (left panel), and reflecting differences in the timing of expression changes across species (right panel). In the right panel, expression levels are standardized for the mean and variance per species (Supplementary Methods). The genes shown are



*C14orf126* and carbonic anhydrase X (*CA10*), respectively. The x-axis represents individuals' ages in  $\log_2$  scale.

(B) Correlation of age-related expression change between different brain regions or different species. The Pearson correlation coefficients were calculated using 15 interpolated points across expression-age cubic spline curves per species per brain region (Supplementary Methods). All the correlation coefficients were based on genes identified as age-related in at least one brain region and detected in both regions (N=9,714).

(C-D) Age-related gene expression change in the PFC and CBC using the subset of 10 individuals per species. To avoid any bias due to the unequal sample size and sample age distribution among the three species, subsets of 10 individuals per species based on stage-of-life matching strategy (C) or chronological matching strategy (D) were chosen to redo the analysis (Supplementary Methods). Each point represents an individual. The colors indicate species (red-human, blue-chimpanzee, green-macaque) on the upper panels and brain regions (red-PFC, gray-CBC) on the lower panels. The upper panels' x-axis represents individual age in fourth root ( $\text{age}^{1/4}$ ) scale. The lower panels' y-axis shows the numbers of age-related genes and species-specific genes detected in each of the 10 individuals' subsets.

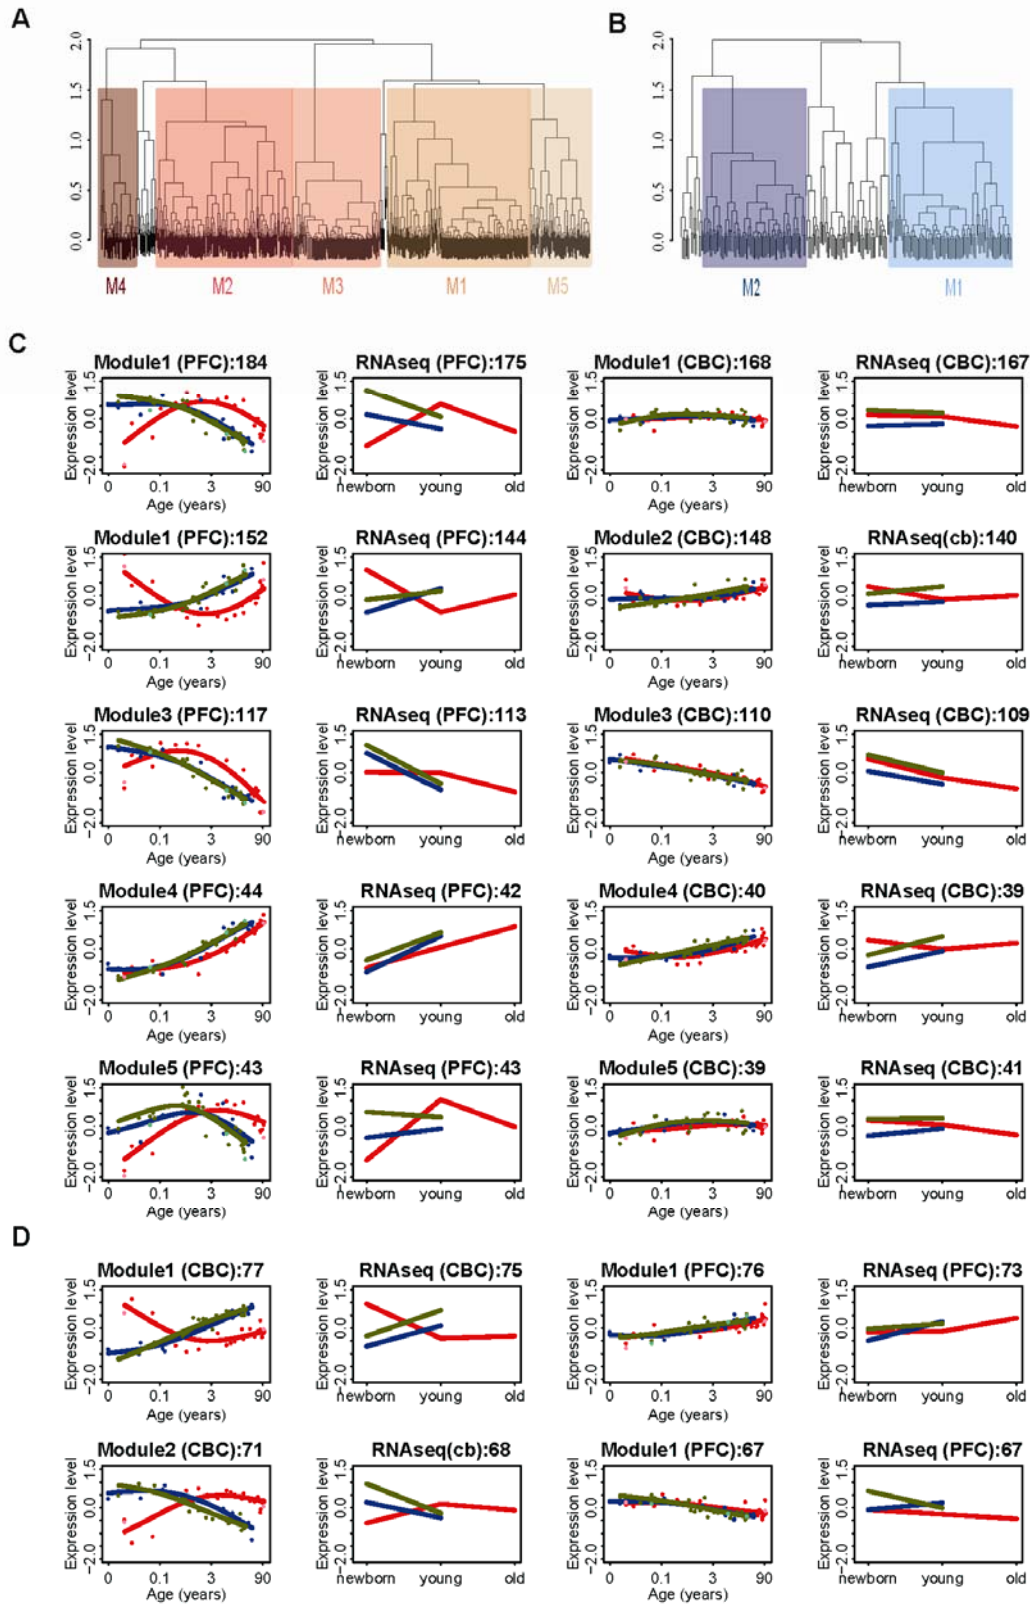

**Figure S2. Human-specific modules and mean normalized expression profiles of human-specific modules in PFC and CBC.**

(A-B) Hierarchical clustering dendrogram of human-specific genes in the PFC (n=702; A) and in the CBC (n=260; B).

The clustering was done using the “complete” method. As distance measure, we used the Person correlation coefficient (specifically,  $1 - r$ ) between expression-age spline curves of two species (based on 15 points interpolated across lifespan per species; see Supplementary Methods). The colored areas indicate co-expression gene modules, numbered according to their size. Modules with <20 members were not used in the downstream analyses.

(C-D) Mean normalized expression profiles of human-specific modules in the PFC (C) and the CBC (D). Each row represents one module. From the leftmost to rightmost panel: (i) the mean expression profile of module genes in the PFC/CBC measured using microarrays and (ii) measured using RNA-seq, (iii) the mean expression profile of the same genes in the other brain region (in the CBC if the module was defined based on the PFC expression profiles, and vice versa) measured using microarrays and (iv) measured using RNA-seq. Each point represents an individual (red-human, blue-chimpanzee, green-macaque, light red-human replicate samples, light green-macaque replicate sample), lines based on microarray measurements show fitted spline curves. The x-axis represents individuals’ ages in  $\log_2$  scale. Note that the identification and clustering of human-specific genes was done excluding replicates. The numbers above each panel show the number of module member genes expressed in that dataset. Expression levels shown were standardized to mean = 0 and standard deviation = 1 before clustering.

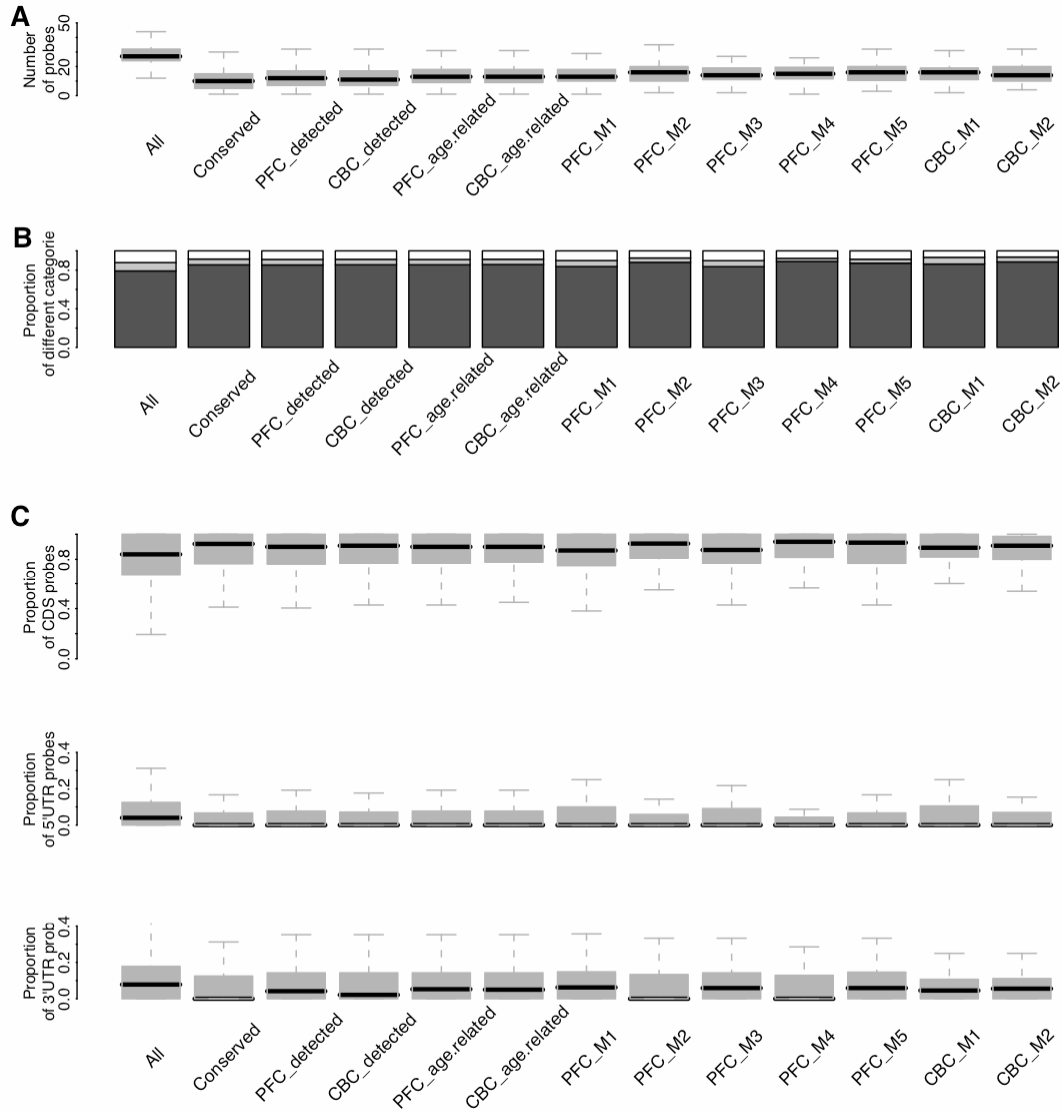

**Figure S3. The distribution of numbers of probes per gene and the location of probes within each gene.** (A) The distribution of numbers of probes per gene among different gene sets: “All”: all genes with all probes; “Conserved”: all genes with probes perfectly and uniquely matching to all three genomes; “CBC/PFC\_detected”: all detected genes with all detected probes in PFC or CBC; “CBC/PFC\_age.related”: all age-related genes in PFC or CBC; “PFC\_M1-5” and “CBC\_M1-2”: genes in each of the 5 human PFC modules and 2 human CBC modules. Within each gene set, the proportion of probes mapped on CDS (dark gray), 5’UTR (gray), and 3’UTR (white) is shown in (B) and the

distribution of the proportion of probes falling within the three different regions per gene is shown in (C).

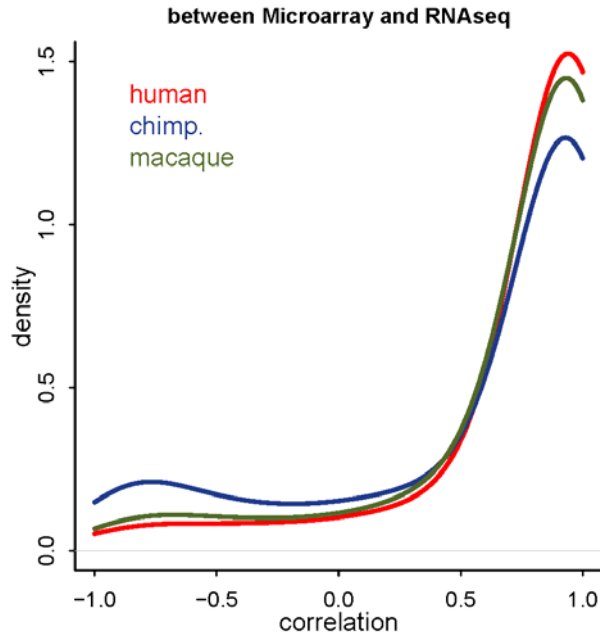

**Figure S4. Correlation between age-related expression changes in PFC measured by microarrays and by RNA-seq.** Pearson correlation coefficients were calculated using 15 points interpolated across expression-age cubic spline curves fitted for each species based on microarray or RNA-seq (dataset two) expression measurements (Supplementary Methods). All correlation coefficients are based on genes identified as age-related in the PFC based on microarray data and detected in the second RNA-seq dataset (N= 7,697).

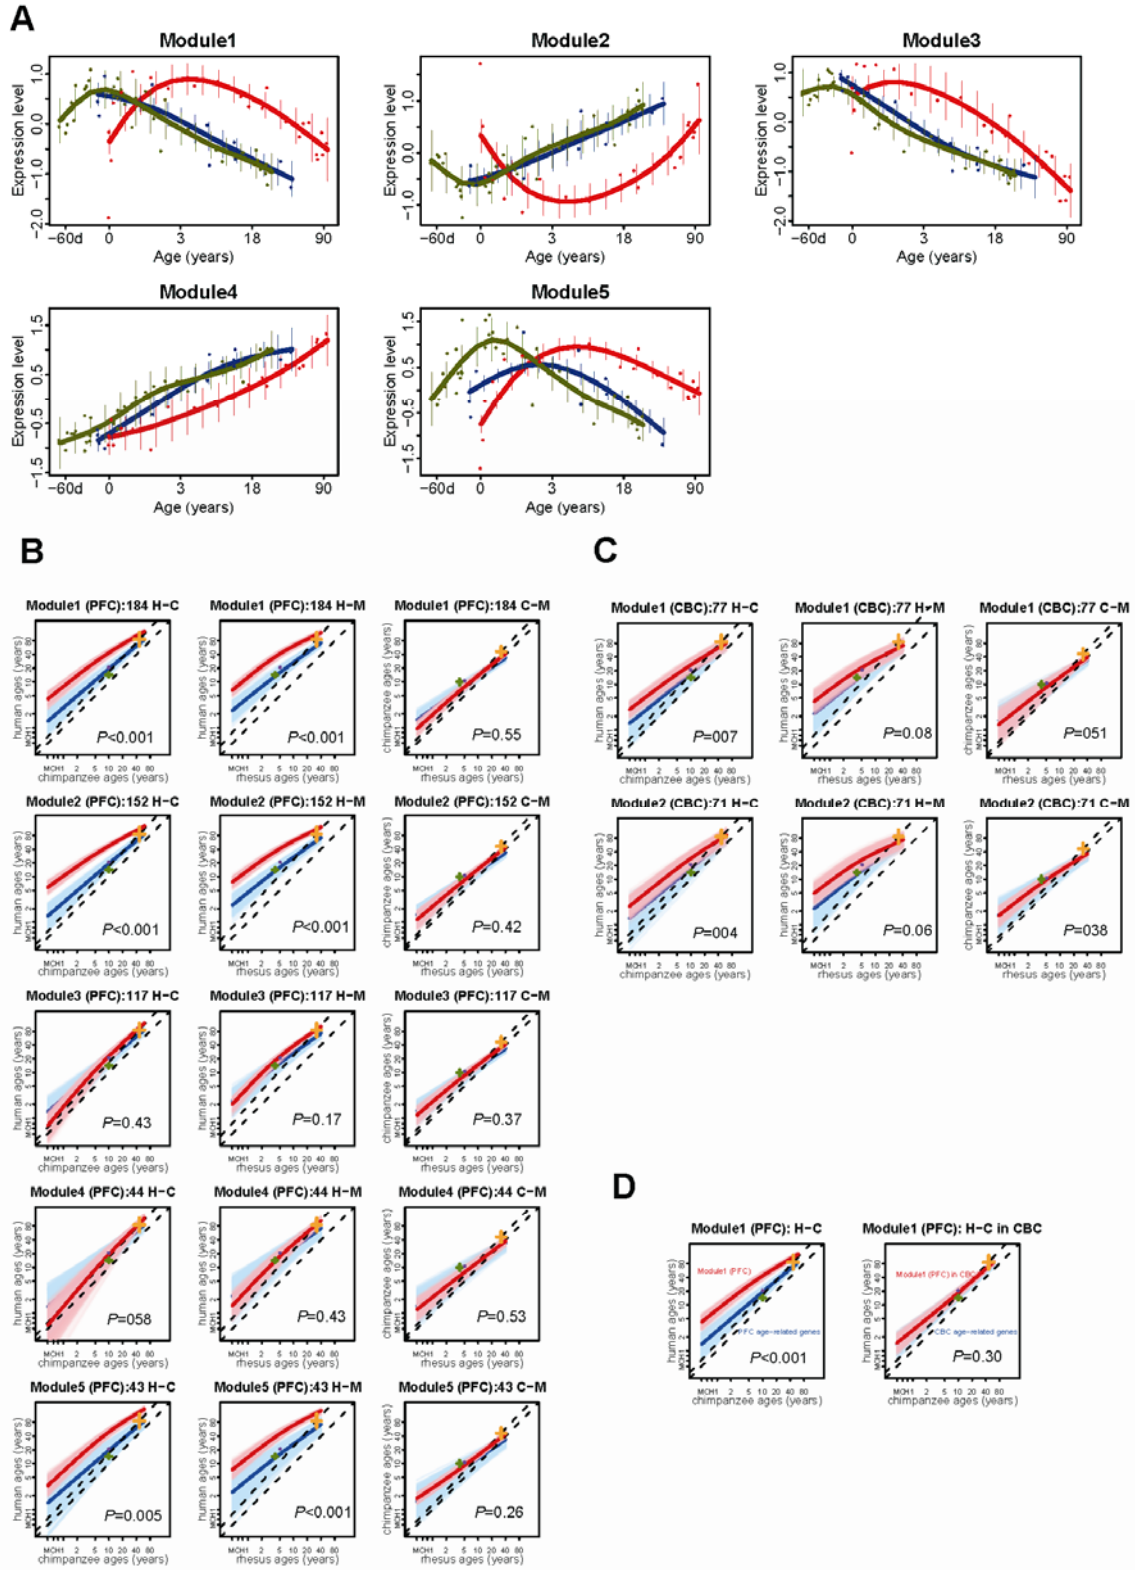

**Figure S5. Timing differences between human, chimpanzee and rhesus macaque gene expression changes in PFC and CBC.**

(A) Expression profiles of human-specific PFC modules including fetal macaque samples. The points represent individuals, (red-human, blue-chimpanzee, green-macaque), The lines represent cubic spline regressions between expression and age for genes within each module. The error bars indicate standard deviation across genes in a module. The x-axis represents individuals' ages on the  $\log_2$  scale.

(B-C) Timing differences between human, chimpanzee and rhesus macaque gene expression changes in PFC (B) and CBC (C). The x- and y-axes show ages in years from estimated conception event in a given pair of species (in  $\log_2$  scale). The module, brain region and species information are marked above each panel: H-C: human vs. chimpanzee, H-M: human vs. macaque, C-M: chimpanzee vs. macaque. Numbers of genes in each module are shown above each plot. The solid curves show at what age gene expression levels in one species correspond to those in the other species, estimated by aligning the two species' expression profiles using the dynamic time warping algorithm (Supplementary Methods). The red curves show the mean time shift estimates for genes in each human-specific expression module in PFC or CBC. The blue curves show the mean time shift estimates for all age-related genes in the PFC or CBC (transcriptome average). The light red areas show variation in each module's time shift estimate, obtained by bootstrapping the module members 1,000 times. The light blue areas show variation in the transcriptome average's time shift estimate, obtained by sampling the same gene number as the size of the respective module out of all age-related genes (in PFC or CBC), 1,000 times. The other lines and symbols show timing of life-history landmarks: Lower and upper black dashed lines show the diagonal and the line passing through the origin and the maximum lifespan point. The symbols represent the following life-history landmarks: maximum lifespan (orange cross), female sexual maturity (green cross), eruption of last permanent dentition (purple circle) (data from (Smith et al. 1994; de Magalhães and Costa 2009)). "H", "C", "M" axes marks indicate the time of birth for human, chimpanzee and macaque, respectively. The statistical significance of the module shift against random background was show in each panel (Supplementary Methods)



(D) Timing difference between human and chimpanzee expression in the PFC and in the CBC for PFC module 1 genes. The x- and y-axes show human and chimpanzee age in years from estimated conception event (in  $\log_2$  scale). The solid curves show at what age human gene expression levels correspond to those of chimpanzee in the PFC (left) and in the CBC (right). The red curves show the mean time shift estimates for PFC module 1 genes. The blue curves show the mean time shift estimates for all age-related genes (transcriptome average). The light red areas show variation in each module's time shift estimate, obtained by bootstrapping the module 1 members 1,000 times. The light blue areas show variation in the transcriptome average's time shift estimate, obtained by sampling the same gene number as the size of the module 1 out of all age-related genes (in PFC or CBC), 1,000 times. The statistical significance of the module shift against random background was shown in each panel (Supplementary Methods). The other lines and symbols show timing of life-history landmarks as in (B).

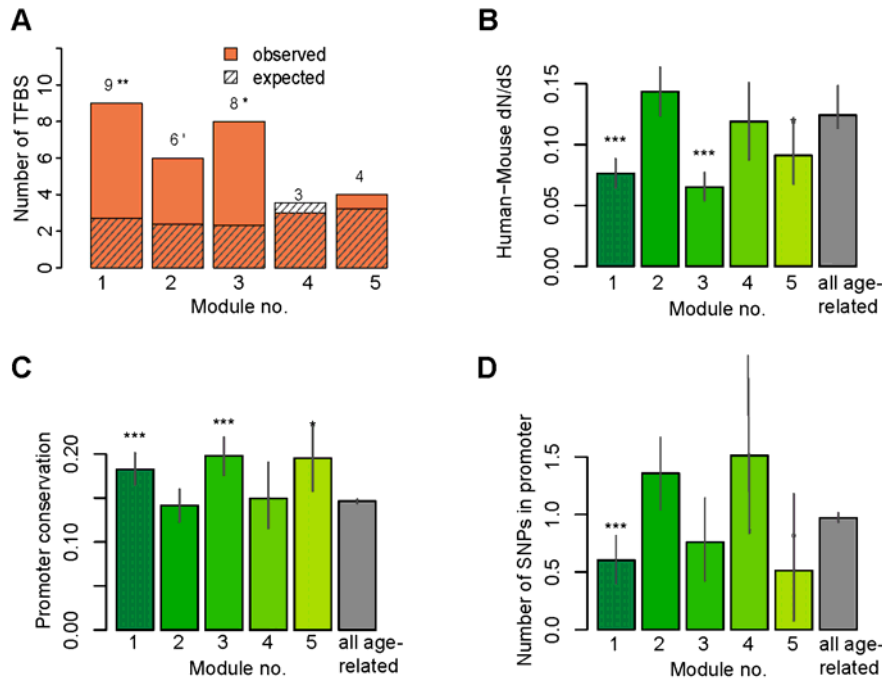

**Figure S6. Sequence conservation among genes in human-specific PFC modules compared to sequence conservation among all age-related genes.**

(A) Number of enriched transcription factor binding sites (TFBS) in human-specific PFC modules. Shown are the numbers of TFBS enriched among genes within each of the five PFC human-specific expression modules. The streaked bars represent the mean number of TFBS expected by chance, calculated by 1,000 random assignments of the PFC age-related genes to the five modules. The numbers and symbols above each bar show numbers of enriched TFBS among module genes (one-sided hypergeometric test,  $p < 0.05$ ), as well as the significance of the number of enriched TFBS based on the 1,000 permutations (\*\*:  $p < 0.01$ ; \*:  $p < 0.05$ ; ':  $p < 0.1$ ).

(B) Amino-acid sequence change rates (dN/dS) between mouse and human.

(C) Proximal promoter conservation levels across 18 placental mammals (PhastCons scores; (Siepel et al. 2005)), normalized by intronic mutation rate for each gene.

(D) The number of human SNPs in the proximal promoter (Perlegen “type A” SNPs (Hinds et al. 2005)). Bars indicate mean conservation among genes in a given module

(green bars) or among all 8,613 age-related PFC genes for which the conservation measure can be obtained (gray bars). Error bars indicate 95% confidence intervals estimated by bootstrapping over genes 1,000 times. The asterisks indicate significance levels based on the one-sided Wilcoxon test, comparing each module to all age-related genes (\*\*\*:  $p < 0.001$ , \*\*:  $p < 0.01$ , \*:  $p < 0.05$ , o:  $p < 0.1$ ).

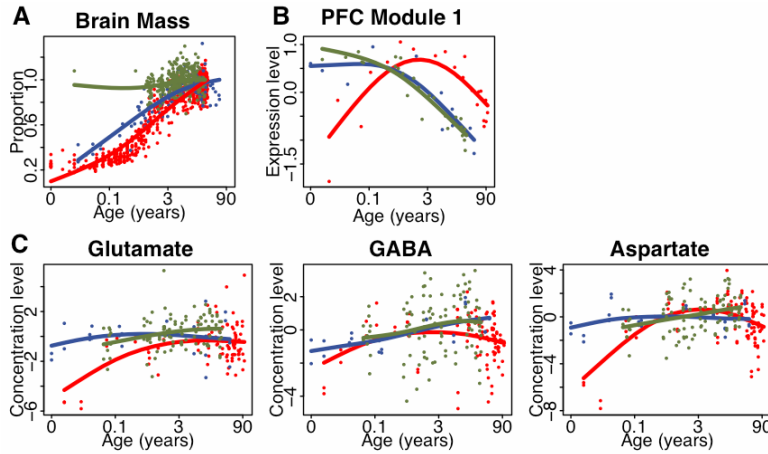

**Figure S7. Association of neurotransmitter concentration changes with brain growth curves and PFC Module 1 expression profiles.** Each point represents an individual (red-human, blue-chimpanzee, green-macaque). The lines show fitted spline curves. The x-axis represents individuals' ages in  $\log_2$  scale. (A) Proportion of the brain mass compared to the maximum value from the fitted spline curve. The brain mass data is taken from (Leigh 2004). (B) Mean expression values of the PFC Module 1 genes. (C) Concentrations of three neurotransmitters, glutamate, GABA and aspartate, in the PFC.

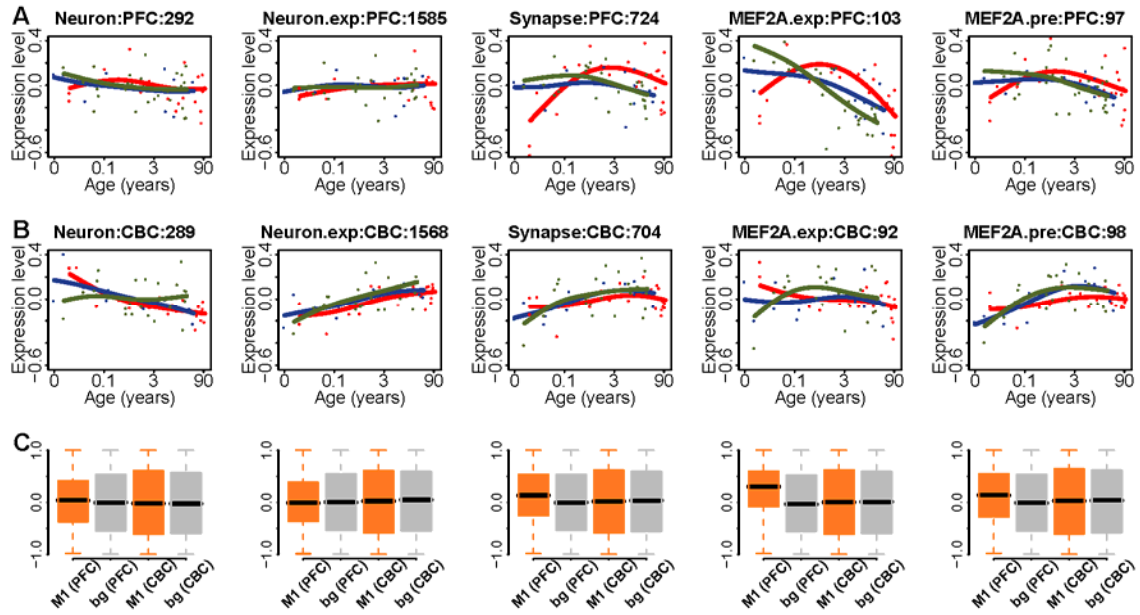

**Figure S8. Mean expression profile of neuron, synapse, and MEF2A -related genes.**

From left to right: (i) neuron-specific (“Neuron”) genes were identified by excluding synapse or axon-related genes from neuron-related genes classified according to GO annotation (Ashburner et al. 2000); (ii) genes highly expressed in neurons compared to glia (“Neuron.exp”) classified based on (Cahoy et al. 2008); (iii) synapse-related genes (“Synapse”) classified according to GO annotation; (iv) activity-dependent targets of MEF2 classified based on (Flavell et al. 2008) (“MEF2A.exp”); (v) predicted MEF2A targets classified based on the TRANSFAC® database (“MEF2A.pre”). (A-B) Each point represents an individual (red-human, blue-chimpanzee, green-macaque), lines based on microarray measurements show fitted spline curves. The x-axis represents individuals’ ages on a  $\log_2$  scale. The numbers above each panel show the number of each gene set expressed in each brain region. Expression levels were standardized to mean=0 and standard deviation=1 before clustering. (C) Distribution of Pearson correlation coefficients between age-related expression changes of genes in each gene set and each gene in the PFC Module 1 (“M1”). Correlations to all other age-related genes are shown as a background (“bg”).

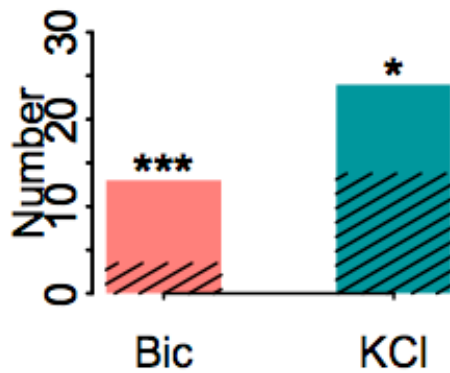

**Figure S9. Numbers of PFC Module 1 genes that are up-regulated in neuronal activation.**

The streaked bars represent numbers of Module 1 genes expected to be up-regulated by chance. Fisher-exact test was used to calculate the significance of overrepresentation of Module 1 genes among genes up-regulated by Bic or KCl (\*\*\*:  $p < 0.001$ , \*:  $p < 0.05$ ).

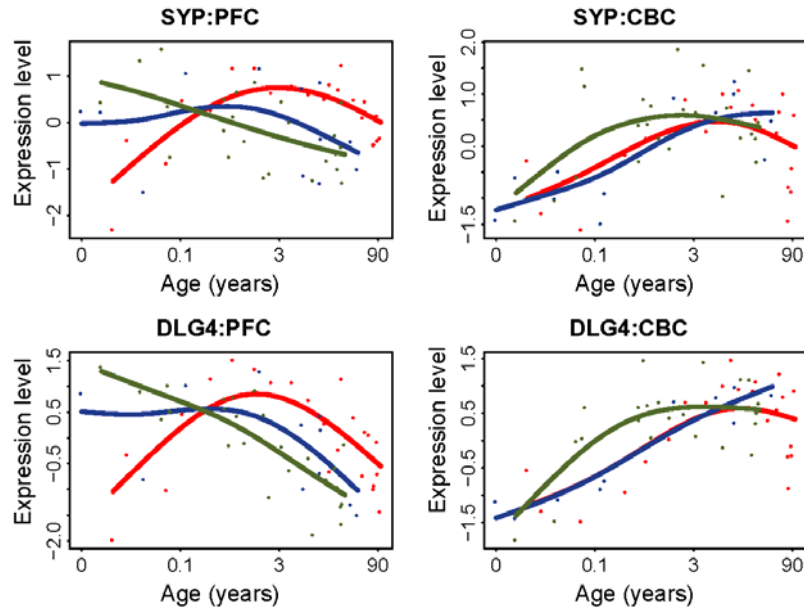

**Figure S10. Expression profiles of *SYP* and *DLG4* in PFC and CBC.** The points represent individuals, colors represent species: red-humans, blue-chimpanzees, and green-macaques. The lines represent cubic spline regressions between expression and age for each gene. The x-axis represents individuals' ages in  $\log_2$  scale.

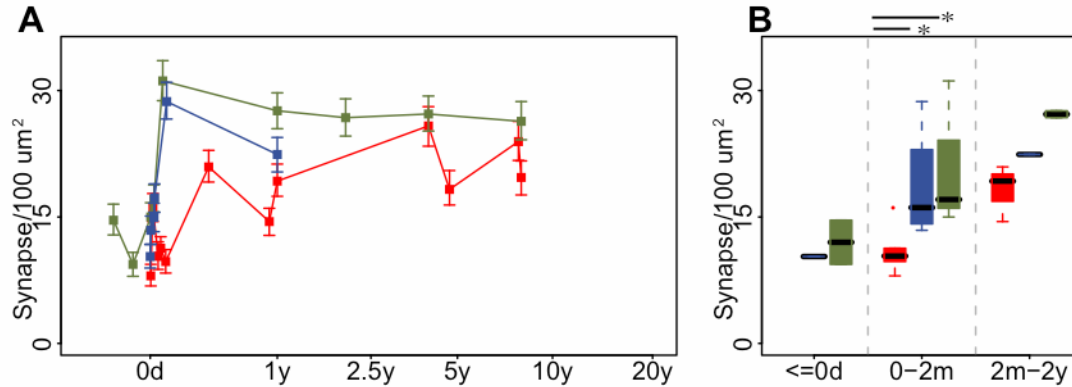

**Figure S11. Synaptic density change during human, chimpanzee, and macaque PFC development.** The synapses counted by A.O. are shown in this figure and counted by X.J. -- in Figure 7. (A) Mean synaptic density per 100  $\mu\text{m}^2$  measured in the PFC of humans (red), chimpanzees (blue) and rhesus macaques (green) at different age. The error bars show 95% confidence intervals obtained by bootstrapping synaptic density values within samples 1,000 times. (B) Statistical analysis of synaptic density in three age groups. The distribution of mean synaptic density from samples within each age group is shown in a boxplot. Within the age range of 0-2 months, PFC synaptic density in humans is significantly lower than in both chimpanzees and macaques (one-sided Wilcoxon test,  $p=0.032$  in human-chimpanzee comparison and  $p=0.036$  in human-macaque comparison), while there was no significant synaptic density difference between chimpanzees and macaques ( $p>0.1$ ). Sample numbers were not sufficient to estimate statistical significance for the other two age intervals.



## Supplementary tables

**Table S1. Sample information**

| Species         | Experiments | Ages |     | Sex | PMI | RIN |     | Batch Information |     |                    |         |                    |                                                                          | Cause of death |
|-----------------|-------------|------|-----|-----|-----|-----|-----|-------------------|-----|--------------------|---------|--------------------|--------------------------------------------------------------------------|----------------|
|                 |             | Year | Day |     |     | PFC | CBC | Microarray        |     | RNA-seq (dataset1) |         | RNA-seq (dataset2) |                                                                          |                |
|                 |             |      |     |     |     |     |     | PFC               | CBC | PFC                | CBC     | PFC                | CBC                                                                      |                |
| Homo sapiens    | a;b;c;d;f   | 0    | 2   | m   | 3   | 8   | 7.2 | 1;2               | 1;2 | newborn            | newborn | 1                  | complications of prematurity                                             |                |
| Homo sapiens    | a;b;c;d;f   | 0    | 4   | m   | 5   | 8.8 | 7.8 | 1                 | 1   | newborn            | newborn | 1                  | congenital heart defect                                                  |                |
| Homo sapiens    | c;d         | 0    | 15  | f   | 3   | 9.1 | 8.3 |                   |     | newborn            | newborn |                    | NA                                                                       |                |
| Homo sapiens    | a;b;c;d;f   | 0    | 19  | f   | 14  | 7.1 | 7.5 | 2                 | 2   | newborn            | newborn | 1                  | pneumonia associated with<br>meconium aspiration<br>idiopathic pulmonary |                |
| Homo sapiens    | a;c;d;f     | 0    | 34  | m   | 7   | 7.9 | 6.9 | 1                 |     | newborn            | newborn | 1                  | hemorrhage                                                               |                |
| Homo sapiens    | a;b;f       | 0    | 94  | m   | 12  | 7.7 | 7.3 | 2                 | 2   |                    |         | 1                  | bronchopneumania                                                         |                |
| Homo sapiens    | b           | 0    | 196 | f   | 24  | 7.8 | 7.9 |                   | 1   |                    |         |                    | sudden infant death syndrome                                             |                |
| Homo sapiens    | a;f         | 0    | 204 | m   | 6   | 8.4 | 7.2 | 1                 |     |                    |         | 1                  | sudden infant death syndrome                                             |                |
| Homo sapiens    | a;b;f       | 1    | 78  | m   | 19  | 7.6 | 7.4 | 2                 | 2   |                    |         | 2                  | Asthma                                                                   |                |
| Homo sapiens    | a;b;f       | 2    | 57  | f   | 21  | 7.5 | 7.5 | 2                 | 2   |                    |         | 2                  | acute myocarditis                                                        |                |
| Homo sapiens    | a;b         | 4    | 170 | f   | 21  | 7.7 | 7.9 | 2                 | 2   |                    |         |                    | lymphocytic myocarditis                                                  |                |
| Homo sapiens    | a;b         | 8    | 2   | m   | 5   | 8.3 | 8.1 | 1                 | 1   |                    |         |                    | cardiac arrhythmia                                                       |                |
| Homo sapiens    | b           | 10   | 262 | f   | 22  | -   | 7.6 |                   | 2   |                    |         |                    | accident, hanging                                                        |                |
| Homo sapiens    | a;b;f       | 13   | 360 | m   | 13  | 8.3 | 8.1 | 1                 | 1   |                    |         | 2                  | hanging                                                                  |                |
| Homo sapiens    | c;d         | 16   | 125 | m   | 16  | 8.3 | 8.2 |                   |     | young              | young   |                    | NA                                                                       |                |
| Homo sapiens    | a;c;d       | 16   | 271 | m   | 15  | 9.1 | 7.6 | 2                 |     | young              | young   |                    | accident, drowning                                                       |                |
| Homo sapiens    | c;d         | 18   | 38  | m   | 6   | 7.2 | 6.8 |                   |     | young              | young   |                    | NA                                                                       |                |
| Homo sapiens    | c;d         | 19   | 69  | f   | 7   | 6.5 | 7   |                   |     | young              | young   |                    | NA                                                                       |                |
| Homo sapiens    | c;d         | 20   | 255 | m   | 12  | 8.7 | 8.9 |                   |     | young              | young   |                    | Accident, lightning striking                                             |                |
| Homo sapiens    | a;b         | 22   | 334 | m   | 4   | 7.3 | 7.6 | 2                 | 2   |                    |         |                    | ASCVD                                                                    |                |
| Homo sapiens    | a;b;f       | 25   | 152 | m   | 19  | 9.2 | 8.9 | 1                 | 1   |                    |         | 2                  | Asthma                                                                   |                |
| Homo sapiens    | a;b         | 39   | 74  | m   | 12  | 7.9 | 7.8 | 2                 | 2   |                    |         |                    | HASCVD                                                                   |                |
| Homo sapiens    | a;b;f       | 53   | 112 | m   | 17  | 8.3 | 8.5 | 1                 | 1   |                    |         | 2                  | ASCVD                                                                    |                |
| Homo sapiens    | a;b         | 58   | 34  | m   | 9   | 8.4 | 8.6 | 2                 | 2   |                    |         |                    | HASCVD                                                                   |                |
| Homo sapiens    | a;b;f       |      |     |     |     |     |     |                   |     |                    |         |                    | ruptured abdominal aneurysm                                              |                |
| Homo sapiens    |             | 66   | 0   | m   | 10  | 8.6 | 8.7 | 1                 | 1   |                    |         | 2                  | aorta                                                                    |                |
| Homo sapiens    | a;b         | 78   | 222 | f   | 3   | 8   | 7.8 | 2                 | 2   |                    |         |                    | natural                                                                  |                |
| Homo sapiens    | a;b         | 80   | 0   | m   | 7   | 8.6 | 8.2 | 1                 | 1   |                    |         |                    | ventricular fibrillation                                                 |                |
| Homo sapiens    | a;b;c;d;f   | 88   | 0   | m   | 7   | 7.7 | 7.3 | 1                 | 1   | old                | old     | 2                  | euthanasia                                                               |                |
| Homo sapiens    | c;d         | 90   | 0   | f   | 6   | 7.8 | 7.6 |                   |     | old                | old     |                    | NA                                                                       |                |
| Homo sapiens    | a;b         | 90   | 0   | f   | 4   | 7.8 | 7.9 | 2                 | 2   |                    |         |                    | natural                                                                  |                |
| Homo sapiens    | c;d         | 96   | 0   | m   | 6   | 7.3 | 7.1 |                   |     | old                | old     |                    | NA                                                                       |                |
| Homo sapiens    | c;d         | 97   | 0   | f   | 5   | 8.4 | 8   |                   |     | old                | old     |                    | NA                                                                       |                |
| Homo sapiens    | a;b;c;d;f   | 98   | 0   | m   | 9   | 7.3 | 7.5 | 1;2               | 1;2 | old                | old     | 2                  | cardiac tamponade due to<br>bleeding from aorta fissure                  |                |
| Pan troglodytes | a;b;c;d;f   | 0    | 0   | m   | -   | 7.5 | 7.4 | 1                 | 1   | newborn            | newborn | 2                  | stillbirth                                                               |                |
| Pan troglodytes | a;b;c;d;f   | 0    | 1   | f   | -   | 7.2 | 7.7 | 1                 | 1   | newborn            | newborn | 2                  | stillbirth                                                               |                |
| Pan troglodytes | b;f         | 0    | 7   | m   | -   | -   | 4.2 |                   | 1   |                    |         | 2                  | NA                                                                       |                |
| Pan troglodytes | a;b;c;d;f   | 0    | 8   | m   | -   | 7.7 | 6.4 | 1                 | 1   | newborn            | newborn | 1                  | NA                                                                       |                |
| Pan troglodytes | a;b;c;d;f   | 0    | 39  | m   | -   | 7   | 6.6 | 1                 | 1   | newborn            | newborn | 1                  | NA                                                                       |                |

|                 |           |    |     |   |   |     |     |     |   |         |         |   |                          |
|-----------------|-----------|----|-----|---|---|-----|-----|-----|---|---------|---------|---|--------------------------|
| Pan troglodytes | b;c;d;f   | 0  | 45  | f | - | -   | 5.2 |     | 1 | newborn | newborn | 2 | NA                       |
| Pan troglodytes | a;b;f     | 1  | 160 | f | - | 7   | 6.3 | 1   | 1 |         |         | 2 | NA                       |
| Pan troglodytes | a;b;c;d;f | 6  | 123 | f | - | 6.4 | 6.1 | 1   | 1 | young   | young   | 1 | NA                       |
| Pan troglodytes | a         | 6  | 257 | f | - | 8.6 | -   | 1   |   |         |         |   | NA                       |
| Pan troglodytes | f         | 8  | 0   | f | - | 8   | -   |     |   |         |         | 2 | NA                       |
| Pan troglodytes | a;b;c;d;f | 11 | 346 | m | - | 6.5 | 7.5 | 1   | 1 | young   | young   | 1 | NA                       |
| Pan troglodytes | a;b;c;d;f | 12 | 35  | m | - | 7.5 | 7.9 | 1   | 1 | young   | young   | 1 | chocked after anesthesia |
| Pan troglodytes | a         | 12 | 120 | m | - | 5.9 | -   | 1   |   |         |         |   | euthanasia               |
| Pan troglodytes | f         | 27 | 0   | f | - | 8.5 | -   |     |   |         |         | 2 | NA                       |
| Pan troglodytes | a;b;c;d;f | 35 | 9   | m | - | 6.3 | 7.4 | 1   | 1 | young   | young   | 1 | NA                       |
| Pan troglodytes | a;b;c;d;f | 44 | 71  | f | - | 6   | 7.4 | 1   | 1 | young   | young   | 1 | anemia (clinical)        |
| Macaca mulatta  | c;d       | 0  | 1   | m | 0 | 8.3 | 6.7 |     |   | newborn | newborn | - |                          |
| Macaca mulatta  | c;d;f     | 0  | 1   | m | 0 | 8.6 | 8.6 |     |   | newborn | newborn | 1 | -                        |
| Macaca mulatta  | a;b;c;d;f | 0  | 1   | m | 0 | 8.9 | 9.1 | 2   | 2 | newborn | newborn | 1 | -                        |
| Macaca mulatta  | c;d       | 0  | 2   | f | 0 | 8.3 | 8.5 |     |   | newborn | newborn | - |                          |
| Macaca mulatta  | a;b;c;d;f | 0  | 7   | m | 0 | 8.7 | 9.9 | 2   | 2 | newborn | newborn | 1 | -                        |
| Macaca mulatta  | a;b;f     | 0  | 16  | m | 0 | 9.1 | 9.8 | 1;2 | 1 |         |         | 1 | -                        |
| Macaca mulatta  | a;b       | 0  | 20  | m | 0 | 9.9 | 9.7 | 1   | 1 |         |         | - |                          |
| Macaca mulatta  | a;b;f     | 0  | 22  | m | 0 | 9.3 | 9.5 | 2   | 2 |         |         | 1 | -                        |
| Macaca mulatta  | a;b       | 0  | 151 | m | 0 | 9.1 | 9   | 2   | 2 |         |         | - |                          |
| Macaca mulatta  | a;b;f     | 0  | 153 | m | 0 | 9.8 | 9   | 1   | 1 |         |         | 1 | -                        |
| Macaca mulatta  | a;b       | 0  | 179 | m | 0 | 9.5 | 8.9 | 2   | 2 |         |         | - |                          |
| Macaca mulatta  | a;b;f     | 0  | 207 | m | 0 | 9.7 | 9   | 1   | 1 |         |         | 1 | -                        |
| Macaca mulatta  | a;b       | 0  | 237 | m | 0 | 9   | 8.9 | 2   | 2 |         |         | - |                          |
| Macaca mulatta  | a;b;f     | 0  | 310 | m | 0 | 9.5 | 7.8 | 1   | 1 |         |         | 2 | -                        |
| Macaca mulatta  | a;b       | 1  | 84  | m | 0 | 9.2 | 8.8 | 2   | 2 |         |         | - |                          |
| Macaca mulatta  | a;b       | 1  | 242 | m | 0 | 8.6 | 8.2 | 2   | 2 |         |         | - |                          |
| Macaca mulatta  | a;b;f     | 2  | 9   | m | 0 | 9   | 9.8 | 1   | 1 |         |         | 2 | -                        |
| Macaca mulatta  | a;b       | 3  | 40  | m | 0 | 8.7 | 9.2 | 2   | 2 |         |         | - |                          |
| Macaca mulatta  | a;b;f     | 4  | 27  | m | 0 | 9   | 9.7 | 1   | 1 |         |         | 2 | -                        |
| Macaca mulatta  | a;b;c;d   | 8  | 16  | m | 0 | 8.7 | 9.1 | 2   | 2 | young   | young   | - |                          |
| Macaca mulatta  | a;b;c;d;f | 9  | 104 | m | 0 | 9   | 8.2 | 1   | 1 | young   | young   | 2 | -                        |
| Macaca mulatta  | c;d       | 10 | 328 | m | 0 | 8.3 | 9.2 |     |   | young   | young   | - |                          |
| Macaca mulatta  | c;d       | 11 | 346 | m | 0 | 9   | 8.5 |     |   | young   | young   | - |                          |
| Macaca mulatta  | c;d       | 14 | 21  | m | 0 | 9.5 | 8.2 |     |   | young   | young   | - |                          |
| Macaca mulatta  | a;b;f     | 15 | 3   | m | 0 | 8.1 | 8.2 | 2   | 2 |         |         | 2 | -                        |
| Macaca mulatta  | a;b       | 20 | 91  | m | 0 | 9   | 8.6 | 1   | 1 |         |         | - |                          |
| Macaca mulatta  | a         | 21 | 8   | m | 0 | 8.7 | -   | 2   |   |         |         | - |                          |
| Macaca mulatta  | a;b;f     | 22 | 74  | m | 0 | 8.5 | 8.9 | 1   | 1 |         |         | 2 | -                        |
| Macaca mulatta  | a         | 25 | 0   | f | 5 | 8.8 | -   | 2   |   |         |         | - |                          |
| Macaca mulatta  | a;b       | 25 | 166 | f | 0 | 8.2 | 7.9 | 2   | 2 |         |         | - |                          |
| Macaca mulatta  | a;b;f     | 26 | 28  | m | 0 | 8.8 | 9.1 | 1   | 1 |         |         | 2 | -                        |
| Macaca mulatta  | a;b;f     | 28 | 0   | f | 0 | 7.8 | 9   | 1;2 | 1 |         |         | 2 | -                        |
| Macaca mulatta  | e         | 0  | -72 | m | 0 | 9   | -   | -   | - | -       | -       | - |                          |
| Macaca mulatta  | e         | 0  | -57 | m | 0 | 9.1 | -   | -   | - | -       | -       | - |                          |
| Macaca mulatta  | e         | 0  | -53 | m | 0 | 9.1 | -   | -   | - | -       | -       | - |                          |
| Macaca mulatta  | e         | 0  | -42 | m | 0 | 8.8 | -   | -   | - | -       | -       | - |                          |
| Macaca mulatta  | e         | 0  | -35 | m | 0 | 8.7 | -   | -   | - | -       | -       | - |                          |
| Macaca mulatta  | e         | 0  | -30 | m | 0 | 8.6 | -   | -   | - | -       | -       | - |                          |

|                |   |   |     |   |   |     |   |   |   |   |   |   |
|----------------|---|---|-----|---|---|-----|---|---|---|---|---|---|
| Macaca mulatta | e | 0 | 1   | m | 0 | 8.8 | - | - | - | - | - | - |
| Macaca mulatta | e | 0 | 24  | m | 0 | 8.1 | - | - | - | - | - | - |
| Macaca mulatta | e | 0 | 182 | m | 0 | 8.7 | - | - | - | - | - | - |
| Macaca mulatta | e | 0 | 353 | m | 0 | 8.6 | - | - | - | - | - | - |
| Macaca mulatta | e | 1 | 114 | m | 0 | 8.2 | - | - | - | - | - | - |
| Macaca mulatta | e | 2 | 101 | m | 0 | 8.6 | - | - | - | - | - | - |

a: RNA microarray for postnatal PFC dataset;

b: RNA microarray for postnatal CBC dataset;

c: RNA-seq for pooled PFC dataset1;

d: RNA-seq for pooled CBC dataset1;

e: RNA microarray for macaque prenatal/neonatal PFC dataset;

f: RNA-seq for PFC dataset2

RIN: RNA integrity values

PMI: Postmortem intervals in hours

ASCVD: arteriosclerotic cardiovascular disease;

HASCVD: hypertensive arteriosclerotic cardiovascular disease.

**Table S2. Numbers of detected genes.**

| Platform         | PFC    | CBC    |
|------------------|--------|--------|
| RNA Microarray   | 12,447 | 12,853 |
| RNAseq Dataset 1 | 15,183 | 14,941 |
| RNAseq Dataset 2 | 14,149 | -      |

**Table S3. FDR estimates for the age-test and species difference-test**

| Dataset                      | Region | p-value          | Age-test                |              |               |              |                |              |             |
|------------------------------|--------|------------------|-------------------------|--------------|---------------|--------------|----------------|--------------|-------------|
|                              |        |                  | Human                   |              | Chimpanzee    |              | Macaque        |              | HCM*        |
|                              |        |                  | gene no.                | FDR          | gene no.      | FDR          | gene no.       | FDR          | gene no.    |
| Full dataset                 | PFC    | p<0.05           | 8904                    | 14.4%        | 5292          | 24.7%        | 6878           | 16.7%        | 10590       |
|                              |        | <b>p&lt;0.01</b> | <b>7071</b>             | <b>3.5%</b>  | <b>3257</b>   | <b>8.4%</b>  | <b>4973</b>    | <b>4.4%</b>  | <b>8613</b> |
|                              |        | p<0.001          | 5022                    | 0.5%         | 1603          | 1.6%         | 3406           | 0.6%         | 6234        |
|                              | CBC    | p<0.05           | 7406                    | 15.1%        | 5868          | 21.9%        | 7038           | 17.1%        | 10372       |
|                              |        | <b>p&lt;0.01</b> | <b>5440</b>             | <b>3.9%</b>  | <b>3609</b>   | <b>7.4%</b>  | <b>5154</b>    | <b>4.6%</b>  | <b>7988</b> |
|                              |        | p<0.001          | 3609                    | 0.6%         | 1802          | 1.6%         | 3583           | 0.7%         | 5526        |
| Stage-of-life matched subset | PFC    | <b>p&lt;0.05</b> | <b>6424</b>             | <b>17.7%</b> | <b>4984</b>   | <b>26.5%</b> | <b>5397</b>    | <b>23.3%</b> | <b>2308</b> |
|                              |        | p<0.01           | 3925                    | 5.9%         | 2915          | 9.6%         | 3318           | 8.2%         | 1091        |
|                              |        | p<0.001          | 1766                    | 1.4%         | 1275          | 2.3%         | 1644           | 1.9%         | 400         |
|                              | CBC    | <b>p&lt;0.05</b> | <b>5151</b>             | <b>24.6%</b> | <b>5266</b>   | <b>24.9%</b> | <b>5869</b>    | <b>22.0%</b> | <b>2171</b> |
|                              |        | p<0.01           | 2943                    | 9.2%         | 3031          | 9.0%         | 3679           | 7.6%         | 1031        |
|                              |        | p<0.001          | 1208                    | 2.5%         | 1357          | 2.1%         | 1782           | 1.9%         | 316         |
| Chronological matched subset | PFC    | <b>p&lt;0.05</b> | <b>6430</b>             | <b>19.4%</b> | <b>4984</b>   | <b>25.0%</b> | <b>5044</b>    | <b>25.8%</b> | <b>2092</b> |
|                              |        | p<0.01           | 3831                    | 6.5%         | 2915          | 9.0%         | 3040           | 9.4%         | 945         |
|                              |        | p<0.001          | 1674                    | 1.7%         | 1275          | 2.2%         | 1405           | 2.1%         | 321         |
|                              | CBC    | <b>p&lt;0.05</b> | <b>5484</b>             | <b>23.5%</b> | <b>5266</b>   | <b>26.6%</b> | <b>5840</b>    | <b>21.7%</b> | <b>2234</b> |
|                              |        | p<0.01           | 3218                    | 8.4%         | 3031          | 9.9%         | 3626           | 7.8%         | 1075        |
|                              |        | p<0.001          | 1390                    | 2.1%         | 1357          | 2.3%         | 1799           | 1.9%         | 343         |
| Dataset                      | Region | p-value          | Species difference-test |              |               |              |                |              |             |
|                              |        |                  | Human-Chimp.            |              | Human-Macaque |              | Chimp.-Macaque |              | HCM*        |
|                              |        |                  | gene no.                | FDR          | gene no.      | FDR          | gene no.       | FDR          | gene no.    |
| Full dataset                 | PFC    | p<0.05           | 2539                    | 38.4%        | 4452          | 18.0%        | 1199           | 60.7%        | 5405        |
|                              |        | <b>p&lt;0.01</b> | <b>1238</b>             | <b>20.4%</b> | <b>2797</b>   | <b>7.0%</b>  | <b>486</b>     | <b>35.0%</b> | <b>3407</b> |
|                              |        | p<0.001          | 445                     | 6.7%         | 1508          | 1.7%         | 165            | 11.5%        | 1788        |
|                              | CBC    | p<0.05           | 1522                    | 51.4%        | 3776          | 23.2%        | 1839           | 40.6%        | 4770        |
|                              |        | <b>p&lt;0.01</b> | <b>637</b>              | <b>30.1%</b> | <b>2221</b>   | <b>10.9%</b> | <b>906</b>     | <b>20.8%</b> | <b>2862</b> |
|                              |        | p<0.001          | 225                     | 12.0%        | 999           | 3.9%         | 391            | 6.9%         | 1321        |
| Stage-of-life matched subset | PFC    | p<0.05           | 363                     | 59.0%        | 518           | 44.0%        | 210            | 93.8%        | 676         |
|                              |        | <b>p&lt;0.01</b> | <b>202</b>              | <b>25.2%</b> | <b>305</b>    | <b>18.9%</b> | <b>109</b>     | <b>42.2%</b> | <b>393</b>  |
|                              |        | p<0.001          | 61                      | 9.8%         | 147           | 5.4%         | 40             | 12.5%        | 184         |
|                              | CBC    | p<0.05           | 146                     | 110.3%       | 288           | 77.8%        | 217            | 91.2%        | 410         |
|                              |        | <b>p&lt;0.01</b> | <b>66</b>               | <b>59.8%</b> | <b>191</b>    | <b>34.0%</b> | <b>136</b>     | <b>39.0%</b> | <b>242</b>  |
|                              |        | p<0.001          | 22                      | 22.7%        | 82            | 8.5%         | 69             | 10.1%        | 116         |
| Chronological matched subset | PFC    | p<0.05           | 337                     | 55.0%        | 394           | 57.5%        | 181            | 87.8%        | 545         |
|                              |        | <b>p&lt;0.01</b> | <b>158</b>              | <b>29.7%</b> | <b>248</b>    | <b>26.4%</b> | <b>86</b>      | <b>46.5%</b> | <b>312</b>  |
|                              |        | p<0.001          | 43                      | 11.6%        | 119           | 8.0%         | 38             | 13.2%        | 156         |
|                              | CBC    | p<0.05           | 128                     | 105.9%       | 301           | 74.4%        | 223            | 92.8%        | 405         |
|                              |        | <b>p&lt;0.01</b> | <b>72</b>               | <b>45.8%</b> | <b>196</b>    | <b>36.2%</b> | <b>135</b>     | <b>41.9%</b> | <b>245</b>  |
|                              |        | p<0.001          | 20                      | 20.0%        | 106           | 11.3%        | 69             | 11.6%        | 137         |

Figures in bold indicate the FDR levels at the cutoffs reported in the main text.

In the Full dataset, genes with p<0.01 for the age-test were considered as age-related genes.

The union of age-related genes among species was then subjected to the differential expression test.

In both 10 samples datasets, genes with p<0.05 for age-test were considered as age-related genes.

The intersection of age related genes among species was then subjected to the differential expression test.

\*HCM: For age-test, the number of genes passing the p-value cutoff in at least one species (Full dataset) or in all species (both 10 samples datasets).

For the species difference test, the number of genes passing the p-value cutoff in at least one species.

**Table S4. Overlap between identified species-specific gene sets.**

| <b>1.Among species</b>       |                              |              |                              |                              |              |                              |                              |
|------------------------------|------------------------------|--------------|------------------------------|------------------------------|--------------|------------------------------|------------------------------|
| Species                      | Dataset                      | PFC          |                              |                              | CBC          |                              |                              |
|                              |                              | Full dataset | Stage-of-life matched subset | Chronological matched subset | Full dataset | Stage-of-life matched subset | Chronological matched subset |
| Human                        | Full dataset                 | 702          | 98 (80%)                     | 91(83%)                      | 260          | 31 (89%)                     | 41(89%)                      |
|                              | Stage-of-life matched subset | 98 (80%)     | 123                          | 70(64%)                      | 31 (89%)     | 35                           | 23(66%)                      |
|                              | Chronological matched subset | 91(83%)      | 70(64%)                      | 110                          | 41(89%)      | 23(66%)                      | 46                           |
| Chimpanzee                   | Full dataset                 | 55           | 5 (36%)                      | 3(33%)                       | 82           | 7 (58%)                      | 6(67%)                       |
|                              | Stage-of-life matched subset | 5 (36%)      | 14                           | 6(67%)                       | 7 (58%)      | 12                           | 4(44%)                       |
|                              | Chronological matched subset | 3(33%)       | 6(67%)                       | 9                            | 6(67%)       | 4(44%)                       | 9                            |
| Macaque                      | Full dataset                 | 259          | 38 (60%)                     | 35(66%)                      | 460          | 80 (80%)                     | 76(75%)                      |
|                              | Stage-of-life matched subset | 38 (60%)     | 64                           | 30(57%)                      | 80 (80%)     | 100                          | 61(61%)                      |
|                              | Chronological matched subset | 35(66%)      | 30(57%)                      | 53                           | 76(75%)      | 61(61%)                      | 101                          |
| <b>2.Between PFC and CBC</b> |                              |              |                              |                              |              |                              |                              |
| Species                      | Region                       | Full dataset |                              | Stage-of-life matched subset |              | Chronological matched subset |                              |
|                              |                              | PFC          | CBC                          | PFC                          | CBC          | PFC                          | CBC                          |
| Human                        | PFC                          | 702          | 32                           | 123                          | 1            | 110                          | 0                            |
|                              | CBC                          | 32           | 260                          | 1                            | 35           | 0                            | 46                           |
| Chimpanzee                   | PFC                          | 55           | 1                            | 14                           | 0            | 9                            | 0                            |
|                              | CBC                          | 1            | 82                           | 0                            | 12           | 0                            | 9                            |
| Macaque                      | PFC                          | 259          | 12                           | 64                           | 0            | 53                           | 0                            |
|                              | CBC                          | 12           | 460                          | 0                            | 100          | 0                            | 101                          |

**Table S5. Genes with human-specific expression profiles.**

| Region | Module  | Ensemble Gene ID | HGNC ID         | Description                                                            |
|--------|---------|------------------|-----------------|------------------------------------------------------------------------|
| PFC    | Module1 | ENSG00000177181  | <i>RIMKLA</i>   | Ribosomal protein S6 modification-like protein A                       |
| PFC    | Module1 | ENSG00000173126  | <i>PCP4L1</i>   | Purkinje cell protein 4 like 1                                         |
| PFC    | Module1 | ENSG00000116584  | <i>ARHGEF2</i>  | Rho guanine nucleotide exchange factor 2                               |
| PFC    | Module1 | ENSG00000185737  | <i>NRG3</i>     | Pro-neuregulin-3, membrane-bound isoform Precursor                     |
| PFC    | Module1 | ENSG00000154478  | <i>GPR26</i>    | Probable G-protein coupled receptor 26                                 |
| PFC    | Module1 | ENSG00000107758  | <i>PPP3CB</i>   | Serine/threonine-protein phosphatase 2B catalytic subunit beta isoform |
| PFC    | Module1 | ENSG00000169129  | <i>AFAP1L2</i>  | Actin filament-associated protein 1-like 2                             |
| PFC    | Module1 | ENSG00000121653  | <i>MAPK8IP1</i> | C-jun-amino-terminal kinase-interacting protein 1                      |
| PFC    | Module1 | ENSG00000149177  | <i>PTPRJ</i>    | Receptor-type tyrosine-protein phosphatase eta Precursor               |
| PFC    | Module1 | ENSG00000152578  | <i>GRIA4</i>    | Glutamate receptor 4 Precursor                                         |
| PFC    | Module1 | ENSG00000137486  | <i>ARRB1</i>    | Beta-arrestin-1                                                        |
| PFC    | Module1 | ENSG00000183715  | —               | Opioid-binding protein/cell adhesion molecule Precursor                |
| PFC    | Module1 | ENSG00000139364  | <i>TMEM132B</i> | Transmembrane protein 132B                                             |
| PFC    | Module1 | ENSG00000060140  | <i>STYK1</i>    | Tyrosine-protein kinase STYK1                                          |
| PFC    | Module1 | ENSG00000151229  | <i>SLC2A13</i>  | Proton myo-inositol cotransporter                                      |
| PFC    | Module1 | ENSG00000135439  | <i>AGAP2</i>    | Arf-GAP, GTPase, ANK repeat and PH domain-containing protein 2         |
| PFC    | Module1 | ENSG00000197991  | <i>PCDH20</i>   | Protocadherin-20 Precursor                                             |
| PFC    | Module1 | ENSG00000100884  | <i>CPNE6</i>    | Copine-6                                                               |
| PFC    | Module1 | ENSG00000139998  | <i>RAB15</i>    | Ras-related protein Rab-15                                             |
| PFC    | Module1 | ENSG00000183092  | <i>BEGAIN</i>   | Brain-enriched guanylate kinase-associated protein                     |
| PFC    | Module1 | ENSG00000186297  | <i>GABRA5</i>   | Gamma-aminobutyric acid receptor subunit alpha-5 Precursor             |
| PFC    | Module1 | ENSG00000169926  | <i>KLF13</i>    | Krueppel-like factor 13                                                |
| PFC    | Module1 | ENSG00000198838  | <i>RYR3</i>     | Ryanodine receptor 3                                                   |
| PFC    | Module1 | ENSG00000166557  | <i>TMED3</i>    | Transmembrane emp24 domain-containing protein 3 Precursor              |
| PFC    | Module1 | ENSG00000140538  | <i>NTRK3</i>    | NT-3 growth factor receptor Precursor                                  |
| PFC    | Module1 | ENSG00000103528  | <i>SYT17</i>    | Synaptotagmin-17                                                       |
| PFC    | Module1 | ENSG00000166501  | <i>PRKCB</i>    | Protein kinase C beta type                                             |
| PFC    | Module1 | ENSG00000006116  | <i>CACNG3</i>   | Voltage-dependent calcium channel gamma-3 subunit                      |
| PFC    | Module1 | ENSG00000132359  | <i>GARNL4</i>   | Rap1 GTPase-activating protein 2                                       |
| PFC    | Module1 | ENSG00000091622  | <i>PITPNM3</i>  | Membrane-associated phosphatidylinositol transfer protein 3            |
| PFC    | Module1 | ENSG00000154975  | <i>CA10</i>     | Carbonic anhydrase-related protein 10                                  |
| PFC    | Module1 | ENSG00000177511  | <i>ST8SIA3</i>  | Sia-alpha-2,3-Gal-beta-1,4-GlcNAc-R:alpha 2,8-sialyltransferase        |
| PFC    | Module1 | ENSG00000206052  | <i>DOK6</i>     | Docking protein 6                                                      |
| PFC    | Module1 | ENSG00000136531  | <i>SCN2A</i>    | Sodium channel protein type 2 subunit alpha                            |
| PFC    | Module1 | ENSG00000138028  | <i>CGREF1</i>   | Cell growth regulator with EF hand domain protein 1                    |
| PFC    | Module1 | ENSG00000198369  | <i>SPRED2</i>   | Sprouty-related, EVH1 domain-containing protein 2                      |
| PFC    | Module1 | ENSG00000168702  | <i>LRP1B</i>    | Low-density lipoprotein receptor-related protein 1B Precursor          |
| PFC    | Module1 | ENSG00000198586  | <i>TLK1</i>     | Serine/threonine-protein kinase tousled-like 1                         |
| PFC    | Module1 | ENSG00000125851  | <i>PCSK2</i>    | Neuroendocrine convertase 2 Precursor                                  |
| PFC    | Module1 | ENSG00000166913  | <i>YWHAB</i>    | 14-3-3 protein beta/alpha                                              |
| PFC    | Module1 | ENSG00000089123  | <i>TASP1</i>    | Threonine aspartase 1                                                  |
| PFC    | Module1 | ENSG00000157103  | <i>SLC6A1</i>   | Sodium- and chloride-dependent GABA transporter 1                      |



|     |         |                 |                 |                                                             |
|-----|---------|-----------------|-----------------|-------------------------------------------------------------|
| PFC | Module1 | ENSG00000170011 | <i>MYRIP</i>    | Rab effector MyRIP                                          |
| PFC | Module1 | ENSG00000175161 | <i>CADM2</i>    | Cell adhesion molecule 2 Precursor                          |
| PFC | Module1 | ENSG00000184307 | <i>ZDHHC23</i>  | Probable palmitoyltransferase ZDHHC23                       |
| PFC | Module1 | ENSG00000197584 | <i>KCNMB2</i>   | Calcium-activated potassium channel subunit beta-2          |
| PFC | Module1 | ENSG00000175182 | <i>FAM131A</i>  | Protein FAM131A Precursor                                   |
| PFC | Module1 | ENSG00000163491 | <i>NEK10</i>    | Serine/threonine-protein kinase Nek10                       |
| PFC | Module1 | ENSG00000163288 | <i>GABRB1</i>   | Gamma-aminobutyric acid receptor subunit beta-1 Precursor   |
| PFC | Module1 | ENSG00000138759 | <i>FRAS1</i>    | Extracellular matrix protein FRAS1 Precursor                |
| PFC | Module1 | ENSG00000109670 | <i>FBXW7</i>    | F-box/WD repeat-containing protein 7                        |
| PFC | Module1 | ENSG00000169271 | <i>HSPB3</i>    | Heat shock protein beta-3                                   |
| PFC | Module1 | ENSG00000152932 | <i>RAB3C</i>    | Ras-related protein Rab-3C                                  |
| PFC | Module1 | ENSG00000152495 | <i>CAMK4</i>    | Calcium/calmodulin-dependent protein kinase type IV         |
| PFC | Module1 | ENSG00000123643 | <i>SLC36A1</i>  | Proton-coupled amino acid transporter 1                     |
| PFC | Module1 | ENSG00000154162 | <i>CDH12</i>    | Cadherin-12 Precursor                                       |
| PFC | Module1 | ENSG00000171617 | <i>ENC1</i>     | Ectoderm-neural cortex protein 1                            |
| PFC | Module1 | ENSG00000129625 | <i>REEP5</i>    | Receptor expression-enhancing protein 5                     |
| PFC | Module1 | ENSG00000135298 | <i>BAI3</i>     | Brain-specific angiogenesis inhibitor 3 Precursor           |
| PFC | Module1 | ENSG00000112379 | <i>KIAA1244</i> | Brefeldin A-inhibited guanine nucleotide-exchange protein 3 |
| PFC | Module1 | ENSG00000175048 | <i>ZDHHC14</i>  | Probable palmitoyltransferase ZDHHC14                       |
| PFC | Module1 | ENSG00000132434 | <i>LANCL2</i>   | LanC-like protein 2                                         |
| PFC | Module1 | ENSG00000006128 | <i>TAC1</i>     | Protachykinin-1 Precursor                                   |
| PFC | Module1 | ENSG00000136297 | <i>MMD2</i>     | Monocyte to macrophage differentiation factor 2             |
| PFC | Module1 | ENSG00000186472 | <i>PCLO</i>     | piccolo isoform 1                                           |
| PFC | Module1 | ENSG00000155093 | <i>PTPRN2</i>   | Receptor-type tyrosine-protein phosphatase N2 Precursor     |
| PFC | Module1 | ENSG00000185053 | <i>SGCZ</i>     | Zeta-sarcoglycan                                            |
| PFC | Module1 | ENSG00000164794 | <i>KCNV1</i>    | Potassium voltage-gated channel subfamily V member 1        |
| PFC | Module1 | ENSG00000119125 | <i>GDA</i>      | Guanine deaminase                                           |
| PFC | Module1 | ENSG00000164946 | <i>FREM1</i>    | FRAS1-related extracellular matrix protein 1 Precursor      |
| PFC | Module1 | ENSG00000136928 | <i>GABBR2</i>   | Gamma-aminobutyric acid type B receptor subunit 2 Precursor |
| PFC | Module1 | ENSG00000078725 | <i>DBC1</i>     | Deleted in bladder cancer protein 1 Precursor               |
| PFC | Module1 | ENSG00000008086 | <i>CDKL5</i>    | Cyclin-dependent kinase-like 5                              |
| PFC | Module1 | ENSG00000200473 |                 | 5S ribosomal RNA                                            |
| PFC | Module1 | ENSG00000162551 | <i>ALPL</i>     | Alkaline phosphatase, tissue-nonspecific isozyme Precursor  |
| PFC | Module1 | ENSG00000121905 | <i>HPCA</i>     | Neuron-specific calcium-binding protein hippocalcin         |
| PFC | Module1 | ENSG00000117410 | <i>ATP6V0B</i>  | V-type proton ATPase 21 kDa proteolipid subunit             |
| PFC | Module1 | ENSG00000162409 | <i>PRKAA2</i>   | 5'-AMP-activated protein kinase catalytic subunit alpha-2   |
| PFC | Module1 | ENSG00000162631 | <i>NTNG1</i>    | Netrin-G1 Precursor                                         |
| PFC | Module1 | ENSG00000162736 | <i>NCSTN</i>    | Nicastrin Precursor                                         |
| PFC | Module1 | ENSG00000198797 | <i>FAM5B</i>    | Protein FAM5B Precursor                                     |
| PFC | Module1 | ENSG00000133019 | <i>CHRM3</i>    | Muscarinic acetylcholine receptor M3                        |
| PFC | Module1 | ENSG00000171603 | <i>CLSTN1</i>   | Calsyntenin-1 Precursor                                     |
| PFC | Module1 | ENSG00000121753 | <i>BAI2</i>     | Brain-specific angiogenesis inhibitor 2 Precursor           |
| PFC | Module1 | ENSG00000186094 | <i>AGBL4</i>    | Cytosolic carboxypeptidase 6                                |
| PFC | Module1 | ENSG00000154511 | <i>FAM69A</i>   | Protein FAM69A                                              |
| PFC | Module1 | ENSG00000116991 | <i>SIPA1L2</i>  | Signal-induced proliferation-associated 1-like protein 2    |

|     |         |                 |                  |                                                                            |
|-----|---------|-----------------|------------------|----------------------------------------------------------------------------|
| PFC | Module1 | ENSG00000189181 | <i>OR14I1</i>    | Olfactory receptor 14I1                                                    |
| PFC | Module1 | ENSG00000107862 | <i>GBF1</i>      | Golgi-specific brefeldin A-resistance guanine nucleotide exchange factor 1 |
| PFC | Module1 | ENSG00000065621 | <i>GSTO2</i>     | Glutathione S-transferase omega-2                                          |
| PFC | Module1 | ENSG00000156395 | <i>SORCS3</i>    | VPS10 domain-containing receptor SorCS3 Precursor                          |
| PFC | Module1 | ENSG00000151023 | <i>ENKUR</i>     | Enkurin                                                                    |
| PFC | Module1 | ENSG00000198915 | <i>RASGEF1A</i>  | Ras-GEF domain-containing family member 1A                                 |
| PFC | Module1 | ENSG00000176769 | <i>TCERG1L</i>   | Transcription elongation regulator 1-like protein                          |
| PFC | Module1 | ENSG00000110514 | <i>MADD</i>      | MAP kinase-activating death domain protein                                 |
| PFC | Module1 | ENSG00000072518 | <i>MARK2</i>     | Serine/threonine-protein kinase MARK2                                      |
| PFC | Module1 | ENSG00000149577 | <i>SIDT2</i>     | SID1 transmembrane family member 2 Precursor                               |
| PFC | Module1 | ENSG00000176697 | <i>BDNF</i>      | Brain-derived neurotrophic factor Precursor                                |
| PFC | Module1 | ENSG00000168539 | <i>CHRM1</i>     | Muscarinic acetylcholine receptor M1                                       |
| PFC | Module1 | ENSG00000172531 | <i>PPP1CA</i>    | Serine/threonine-protein phosphatase PP1-alpha catalytic subunit           |
| PFC | Module1 | ENSG00000186642 | <i>PDE2A</i>     | cGMP-dependent 3',5'-cyclic phosphodiesterase                              |
| PFC | Module1 | ENSG00000135519 | <i>KCNH3</i>     | Potassium voltage-gated channel subfamily H member 3                       |
| PFC | Module1 | ENSG00000174437 | <i>ATP2A2</i>    | Sarcoplasmic/endoplasmic reticulum calcium ATPase 2                        |
| PFC | Module1 | ENSG00000151176 | <i>PLBD2</i>     | Putative phospholipase B-like 2 Precursor                                  |
| PFC | Module1 | ENSG00000139645 | <i>ANKRD52</i>   | Serine/threonine-protein phosphatase 6 regulatory ankyrin repeat subunit C |
| PFC | Module1 | ENSG00000153233 | <i>PTPRR</i>     | Receptor-type tyrosine-protein phosphatase R Precursor                     |
| PFC | Module1 | ENSG00000139318 | <i>DUSP6</i>     | Dual specificity protein phosphatase 6                                     |
| PFC | Module1 | ENSG00000111344 | <i>RASAL1</i>    | RasGAP-activating-like protein 1                                           |
| PFC | Module1 | ENSG00000179841 | <i>AKAP5</i>     | A-kinase anchor protein 5                                                  |
| PFC | Module1 | ENSG00000021645 | <i>NRXN3</i>     | Neurexin-3-beta Precursor                                                  |
| PFC | Module1 | ENSG00000100505 | <i>TRIM9</i>     | Tripartite motif-containing protein 9                                      |
| PFC | Module1 | ENSG00000166068 | <i>SPRED1</i>    | Sprouty-related, EVH1 domain-containing protein 1                          |
| PFC | Module1 | ENSG00000137766 | <i>UNC13C</i>    | Protein unc-13 homolog C                                                   |
| PFC | Module1 | ENSG00000068305 | <i>MEF2A</i>     | Myocyte-specific enhancer factor 2A                                        |
| PFC | Module1 | ENSG00000058335 | <i>RASGRF1</i>   | Ras-specific guanine nucleotide-releasing factor 1                         |
| PFC | Module1 | ENSG00000102879 | <i>CORO1A</i>    | Coronin-1A                                                                 |
| PFC | Module1 | ENSG00000157368 | <i>IL34</i>      | Interleukin-34 Precursor                                                   |
| PFC | Module1 | ENSG00000169181 | <i>GSG1L</i>     | Germ cell-specific gene 1-like protein                                     |
| PFC | Module1 | ENSG00000006740 | —                | Rho GTPase-activating protein RICH2                                        |
| PFC | Module1 | ENSG00000131242 | <i>RAB11FIP4</i> | Rab11 family-interacting protein 4                                         |
| PFC | Module1 | ENSG00000108352 | <i>RAPGEFL1</i>  | Rap guanine nucleotide exchange factor-like 1                              |
| PFC | Module1 | ENSG00000120088 | <i>CRHR1</i>     | Corticotropin-releasing factor receptor 1 Precursor                        |
| PFC | Module1 | ENSG00000132535 | <i>DLG4</i>      | Disks large homolog 4                                                      |
| PFC | Module1 | ENSG00000179036 | —                | —                                                                          |
| PFC | Module1 | ENSG00000108262 | <i>GIT1</i>      | ARF GTPase-activating protein GIT1                                         |
| PFC | Module1 | ENSG00000161714 | <i>PLCD3</i>     | 1-phosphatidylinositol-4,5-bisphosphate phosphodiesterase delta-3          |
| PFC | Module1 | ENSG00000041353 | <i>RAB27B</i>    | Ras-related protein Rab-27B                                                |
| PFC | Module1 | ENSG00000128626 | <i>MRPS12</i>    | 28S ribosomal protein S12, mitochondrial Precursor                         |
| PFC | Module1 | ENSG00000160014 | <i>CALM3</i>     | Calmodulin                                                                 |
| PFC | Module1 | ENSG00000065000 | <i>AP3D1</i>     | AP-3 complex subunit delta-1                                               |
| PFC | Module1 | ENSG00000186111 | <i>PIP5K1C</i>   | Phosphatidylinositol-4-phosphate 5-kinase type-1 gamma                     |

|     |         |                 |                 |                                                                              |
|-----|---------|-----------------|-----------------|------------------------------------------------------------------------------|
| PFC | Module1 | ENSG00000118160 | <i>SLC8A2</i>   | Sodium/calcium exchanger 2 Precursor                                         |
| PFC | Module1 | ENSG00000105053 | <i>VRK3</i>     | Serine/threonine-protein kinase VRK3                                         |
| PFC | Module1 | ENSG00000115738 | <i>ID2</i>      | DNA-binding protein inhibitor ID-2                                           |
| PFC | Module1 | ENSG00000162975 | <i>KCNF1</i>    | Potassium voltage-gated channel subfamily F member 1                         |
| PFC | Module1 | ENSG00000057935 | <i>MTA3</i>     | Metastasis-associated protein MTA3                                           |
| PFC | Module1 | ENSG00000055813 | <i>CCDC85A</i>  | Coiled-coil domain-containing protein 85A                                    |
| PFC | Module1 | ENSG00000170485 | <i>NPAS2</i>    | Neuronal PAS domain-containing protein 2                                     |
| PFC | Module1 | ENSG00000155052 | <i>CNTNAP5</i>  | Contactin-associated protein-like 5 Precursor                                |
| PFC | Module1 | ENSG00000115896 | <i>PLCL1</i>    | Inactive phospholipase C-like protein 1                                      |
| PFC | Module1 | ENSG00000115194 | <i>SLC30A3</i>  | Zinc transporter 3                                                           |
| PFC | Module1 | ENSG00000184261 | <i>KCNK12</i>   | Potassium channel subfamily K member 12                                      |
| PFC | Module1 | ENSG00000138411 | <i>HECW2</i>    | E3 ubiquitin-protein ligase HECW2                                            |
| PFC | Module1 | ENSG00000188674 | <i>C2orf80</i>  | Uncharacterized protein C2orf80                                              |
| PFC | Module1 | ENSG00000101337 | <i>TM9SF4</i>   | Transmembrane 9 superfamily member 4 Precursor                               |
| PFC | Module1 | ENSG00000101079 | <i>NDRG3</i>    | Protein NDRG3                                                                |
| PFC | Module1 | ENSG00000154654 | <i>NCAM2</i>    | Neural cell adhesion molecule 2 Precursor                                    |
| PFC | Module1 | ENSG00000133424 | <i>LARGE</i>    | Glycosyltransferase-like protein LARGE1                                      |
| PFC | Module1 | ENSG00000166862 | <i>CACNG2</i>   | Voltage-dependent calcium channel gamma-2 subunit                            |
| PFC | Module1 | ENSG00000088538 | <i>DOCK3</i>    | Dedicator of cytokinesis protein 3                                           |
| PFC | Module1 | ENSG00000113966 | <i>ARL6</i>     | ADP-ribosylation factor-like protein 6                                       |
| PFC | Module1 | ENSG00000198919 | <i>DZIP3</i>    | E3 ubiquitin-protein ligase DZIP3                                            |
| PFC | Module1 | ENSG00000031081 | —               | Cdc42 GTPase-activating protein                                              |
| PFC | Module1 | ENSG00000151789 | <i>ZNF385D</i>  | Zinc finger protein 385D                                                     |
| PFC | Module1 | ENSG00000163947 | <i>ARHGEF3</i>  | Rho guanine nucleotide exchange factor 3                                     |
| PFC | Module1 | ENSG00000151276 | <i>MAGI1</i>    | Membrane-associated guanylate kinase, WW and PDZ domain-containing protein 1 |
| PFC | Module1 | ENSG00000074416 | <i>MGLL</i>     | Monoglyceride lipase                                                         |
| PFC | Module1 | ENSG00000068885 | <i>IFT80</i>    | Intraflagellar transport protein 80 homolog                                  |
| PFC | Module1 | ENSG00000163285 | <i>GABRG1</i>   | Gamma-aminobutyric acid receptor subunit gamma-1 Precursor                   |
| PFC | Module1 | ENSG00000151834 | <i>GABRA2</i>   | Gamma-aminobutyric acid receptor subunit alpha-2 Precursor                   |
| PFC | Module1 | ENSG00000178382 | —               | —                                                                            |
| PFC | Module1 | ENSG00000158985 | <i>CDC42SE2</i> | CDC42 small effector protein 2                                               |
| PFC | Module1 | ENSG00000183775 | <i>KCTD16</i>   | BTB/POZ domain-containing protein KCTD16                                     |
| PFC | Module1 | ENSG00000170624 | <i>SGCD</i>     | Delta-sarcoglycan                                                            |
| PFC | Module1 | ENSG00000145824 | <i>CXCL14</i>   | C-X-C motif chemokine 14 Precursor                                           |
| PFC | Module1 | ENSG00000184347 | <i>SLIT3</i>    | Slit homolog 3 protein Precursor                                             |
| PFC | Module1 | ENSG00000069122 | <i>GPR116</i>   | Probable G-protein coupled receptor 116 Precursor                            |
| PFC | Module1 | ENSG00000152034 | <i>MCHR2</i>    | Melanin-concentrating hormone receptor 2                                     |
| PFC | Module1 | ENSG00000185345 | <i>PARK2</i>    | E3 ubiquitin-protein ligase parkin                                           |
| PFC | Module1 | ENSG00000160963 | <i>EMID2</i>    | Collagen alpha-1                                                             |
| PFC | Module1 | ENSG00000130226 | <i>DPP6</i>     | Dipeptidyl aminopeptidase-like protein 6                                     |
| PFC | Module1 | ENSG00000058404 | <i>CAMK2B</i>   | Calcium/calmodulin-dependent protein kinase type II beta chain               |
| PFC | Module1 | ENSG00000106089 | <i>STX1A</i>    | Syntaxin-1A                                                                  |
| PFC | Module1 | ENSG00000179603 | <i>GRM8</i>     | Metabotropic glutamate receptor 8 Precursor                                  |
| PFC | Module1 | ENSG00000008853 | <i>RHOBTB2</i>  | Rho-related BTB domain-containing protein 2                                  |

|     |         |                 |                 |                                                                        |
|-----|---------|-----------------|-----------------|------------------------------------------------------------------------|
| PFC | Module1 | ENSG00000153317 | <i>ASAP1</i>    | Arf-GAP with SH3 domain, ANK repeat and PH domain-containing protein 1 |
| PFC | Module1 | ENSG00000147724 | <i>FAM135B</i>  | Protein FAM135B                                                        |
| PFC | Module1 | ENSG00000122733 | <i>KIAA1045</i> | Protein KIAA1045                                                       |
| PFC | Module1 | ENSG00000156017 | <i>C9orf41</i>  | UPF0586 protein C9orf41                                                |
| PFC | Module1 | ENSG00000123091 | <i>RNF11</i>    | RING finger protein 11                                                 |
| PFC | Module1 | ENSG00000140104 | <i>C14orf79</i> | Uncharacterized protein C14orf79                                       |
| PFC | Module1 | ENSG00000140545 | <i>MFGE8</i>    | Lactadherin Precursor                                                  |
| PFC | Module1 | ENSG00000144712 | <i>CAND2</i>    | Cullin-associated NEDD8-dissociated protein 2                          |
| PFC | Module1 | ENSG0000017483  | <i>SLC38A5</i>  | Sodium-coupled neutral amino acid transporter 5                        |
| PFC | Module2 | ENSG00000169504 | <i>CLIC4</i>    | Chloride intracellular channel protein 4                               |
| PFC | Module2 | ENSG00000159023 | <i>EPB41</i>    | Protein 4.1                                                            |
| PFC | Module2 | ENSG00000077585 | <i>GPR137B</i>  | Integral membrane protein GPR137B                                      |
| PFC | Module2 | ENSG00000036549 | <i>ZZZ3</i>     | ZZ-type zinc finger-containing protein 3                               |
| PFC | Module2 | ENSG00000170242 | <i>USP47</i>    | Ubiquitin carboxyl-terminal hydrolase 47                               |
| PFC | Module2 | ENSG00000086848 | <i>FDXACB1</i>  | Ferredoxin-fold anticodon-binding domain-containing protein 1          |
| PFC | Module2 | ENSG00000185591 | <i>SP1</i>      | Transcription factor Sp1                                               |
| PFC | Module2 | ENSG00000120802 | <i>TMPO</i>     | Lamina-associated polypeptide 2, isoforms beta/gamma                   |
| PFC | Module2 | ENSG00000076513 | <i>ANKRD13A</i> | Ankyrin repeat domain-containing protein 13A                           |
| PFC | Module2 | ENSG00000111642 | <i>CHD4</i>     | Chromodomain-helicase-DNA-binding protein 4                            |
| PFC | Module2 | ENSG00000111266 | <i>DUSP16</i>   | Dual specificity protein phosphatase 16                                |
| PFC | Module2 | ENSG00000134294 | <i>SLC38A2</i>  | Sodium-coupled neutral amino acid transporter 2                        |
| PFC | Module2 | ENSG00000135108 | <i>FBXO21</i>   | F-box only protein 21                                                  |
| PFC | Module2 | ENSG00000100578 | <i>KIAA0586</i> | Uncharacterized protein KIAA0586                                       |
| PFC | Module2 | ENSG00000140043 | <i>PTGR2</i>    | Prostaglandin reductase 2                                              |
| PFC | Module2 | ENSG00000092201 | <i>SUPT16HP</i> | FACT complex subunit SPT16                                             |
| PFC | Module2 | ENSG00000184935 | —               | —                                                                      |
| PFC | Module2 | ENSG00000166917 | —               | —                                                                      |
| PFC | Module2 | ENSG00000144036 | <i>EXOC6B</i>   | Exocyst complex component 6B                                           |
| PFC | Module2 | ENSG00000124226 | <i>RNF114</i>   | RING finger protein 114                                                |
| PFC | Module2 | ENSG00000101384 | <i>JAG1</i>     | Protein jagged-1 Precursor                                             |
| PFC | Module2 | ENSG00000131375 | <i>CAPN7</i>    | Calpain-7                                                              |
| PFC | Module2 | ENSG00000169379 | <i>ARL13B</i>   | ADP-ribosylation factor-like protein 13B                               |
| PFC | Module2 | ENSG00000173889 | <i>PHC3</i>     | Polyhomeotic-like protein 3                                            |
| PFC | Module2 | ENSG00000163961 | <i>RNF168</i>   | E3 ubiquitin-protein ligase RNF168                                     |
| PFC | Module2 | ENSG00000118785 | <i>SPP1</i>     | Osteopontin Precursor                                                  |
| PFC | Module2 | ENSG00000109606 | <i>DHX15</i>    | Putative pre-mRNA-splicing factor ATP-dependent RNA helicase DHX15     |
| PFC | Module2 | ENSG00000109323 | <i>MANBA</i>    | Beta-mannosidase Precursor                                             |
| PFC | Module2 | ENSG00000109381 | <i>ELF2</i>     | ETS-related transcription factor Elf-2                                 |
| PFC | Module2 | ENSG00000170088 | <i>TMEM192</i>  | Transmembrane protein 192                                              |
| PFC | Module2 | ENSG00000164292 | <i>RHOBTB3</i>  | Rho-related BTB domain-containing protein 3                            |
| PFC | Module2 | ENSG00000070193 | <i>FGF10</i>    | Fibroblast growth factor 10 Precursor                                  |
| PFC | Module2 | ENSG00000158987 | <i>RAPGEF6</i>  | Rap guanine nucleotide exchange factor 6                               |
| PFC | Module2 | ENSG00000065615 | <i>CYB5R4</i>   | Cytochrome b5 reductase 4                                              |
| PFC | Module2 | ENSG00000105856 | <i>HBPI</i>     | HMG box-containing protein 1                                           |

|     |         |                  |                  |                                                                       |
|-----|---------|------------------|------------------|-----------------------------------------------------------------------|
| PFC | Module2 | ENSG00000013374  | <i>NUB1</i>      | NEDD8 ultimate buster 1                                               |
| PFC | Module2 | ENSG000000157191 | <i>NECAP2</i>    | Adaptin ear-binding coat-associated protein 2                         |
| PFC | Module2 | ENSG000000162607 | <i>USP1</i>      | Ubiquitin carboxyl-terminal hydrolase 1                               |
| PFC | Module2 | ENSG000000189195 | <i>BTBD8</i>     | BTB/POZ domain-containing protein 8                                   |
| PFC | Module2 | ENSG000000143469 | <i>SYT14</i>     | Synaptotagmin-14                                                      |
| PFC | Module2 | ENSG000000117525 | <i>F3</i>        | Tissue factor Precursor                                               |
| PFC | Module2 | ENSG000000085465 | <i>OVGP1</i>     | Oviduct-specific glycoprotein Precursor                               |
| PFC | Module2 | ENSG000000081019 | <i>RSBN1</i>     | Round spermatid basic protein 1                                       |
| PFC | Module2 | ENSG000000143498 | <i>TAF1A</i>     | TATA box-binding protein-associated factor RNA polymerase I subunit A |
| PFC | Module2 | ENSG000000138293 | <i>NCOA4</i>     | Nuclear receptor coactivator 4                                        |
| PFC | Module2 | ENSG000000096717 | <i>SIRT1</i>     | NAD-dependent deacetylase sirtuin-1                                   |
| PFC | Module2 | ENSG000000060339 | <i>CCAR1</i>     | Cell division cycle and apoptosis regulator protein 1                 |
| PFC | Module2 | ENSG000000214435 | <i>AS3MT</i>     | Arsenite methyltransferase                                            |
| PFC | Module2 | ENSG000000108055 | <i>SMC3</i>      | Structural maintenance of chromosomes protein 3                       |
| PFC | Module2 | ENSG000000152487 | –                | –                                                                     |
| PFC | Module2 | ENSG000000150093 | <i>ITGB1</i>     | Integrin beta-1 Precursor                                             |
| PFC | Module2 | ENSG000000132274 | <i>TRIM22</i>    | Tripartite motif-containing protein 22                                |
| PFC | Module2 | ENSG000000149054 | <i>ZNF215</i>    | Zinc finger protein 215                                               |
| PFC | Module2 | ENSG000000187079 | <i>TEAD1</i>     | Transcriptional enhancer factor TEF-1                                 |
| PFC | Module2 | ENSG000000042429 | <i>MED17</i>     | Mediator of RNA polymerase II transcription subunit 17                |
| PFC | Module2 | ENSG000000110756 | <i>HPS5</i>      | Hermansky-Pudlak syndrome 5 protein                                   |
| PFC | Module2 | ENSG000000137513 | <i>NARS2</i>     | Probable asparaginyl-tRNA synthetase, mitochondrial Precursor         |
| PFC | Module2 | ENSG000000149308 | <i>NPAT</i>      | Protein NPAT                                                          |
| PFC | Module2 | ENSG000000137656 | <i>BUD13</i>     | BUD13 homolog                                                         |
| PFC | Module2 | ENSG000000127311 | <i>HELB</i>      | DNA helicase B                                                        |
| PFC | Module2 | ENSG000000135093 | <i>USP30</i>     | Ubiquitin carboxyl-terminal hydrolase 30                              |
| PFC | Module2 | ENSG000000161800 | <i>RACGAP1P</i>  | Rac GTPase-activating protein 1                                       |
| PFC | Module2 | ENSG000000133858 | <i>ZFC3H1</i>    | Zinc finger C3H1 domain-containing protein                            |
| PFC | Module2 | ENSG000000139357 | <i>SLC5A8</i>    | Sodium-coupled monocarboxylate transporter 1                          |
| PFC | Module2 | ENSG000000202335 | –                | Small nucleolar RNA SNORD50                                           |
| PFC | Module2 | ENSG000000134899 | <i>ERCC5</i>     | DNA repair protein complementing XP-G cells                           |
| PFC | Module2 | ENSG000000152193 | <i>RNF219</i>    | RING finger protein 219                                               |
| PFC | Module2 | ENSG000000088448 | <i>ANKRD10</i>   | Ankyrin repeat domain-containing protein 10                           |
| PFC | Module2 | ENSG000000185246 | <i>PRPF39</i>    | Pre-mRNA-processing factor 39                                         |
| PFC | Module2 | ENSG000000165934 | <i>CPSF2</i>     | Cleavage and polyadenylation specificity factor subunit 2             |
| PFC | Module2 | ENSG000000213741 | <i>RPS29P9</i>   | 40S ribosomal protein S29                                             |
| PFC | Module2 | ENSG000000100522 | <i>GNPNAT1</i>   | Glucosamine 6-phosphate N-acetyltransferase                           |
| PFC | Module2 | ENSG000000185650 | <i>ZFP36L1</i>   | Butyrate response factor 1                                            |
| PFC | Module2 | ENSG000000119688 | <i>ABCD4</i>     | ATP-binding cassette sub-family D member 4                            |
| PFC | Module2 | ENSG000000119720 | <i>C14orf102</i> | UPF0614 protein C14orf102                                             |
| PFC | Module2 | ENSG000000128923 | <i>FAM63B</i>    | Protein FAM63B                                                        |
| PFC | Module2 | ENSG000000103671 | <i>TRIP4</i>     | Activating signal cointegrator 1                                      |
| PFC | Module2 | ENSG000000167202 | <i>TBC1D2B</i>   | TBC1 domain family member 2B                                          |
| PFC | Module2 | ENSG000000103187 | <i>COTL1</i>     | Coactosin-like protein                                                |

|     |         |                 |                  |                                                            |
|-----|---------|-----------------|------------------|------------------------------------------------------------|
| PFC | Module2 | ENSG00000070366 | <i>SMG6</i>      | Telomerase-binding protein EST1A                           |
| PFC | Module2 | ENSG00000074356 | <i>C17orf85</i>  | Uncharacterized protein C17orf85                           |
| PFC | Module2 | ENSG00000108592 | <i>FTSJ3</i>     | Putative rRNA methyltransferase 3                          |
| PFC | Module2 | ENSG00000067900 | <i>ROCK1</i>     | Rho-associated protein kinase 1                            |
| PFC | Module2 | ENSG00000105185 | <i>PDCD5</i>     | Programmed cell death protein 5                            |
| PFC | Module2 | ENSG00000196357 | <i>ZNF565</i>    | Zinc finger protein 565                                    |
| PFC | Module2 | ENSG00000173960 | <i>UBXN2A</i>    | UBX domain-containing protein 2A                           |
| PFC | Module2 | ENSG00000080345 | <i>RIF1</i>      | Telomere-associated protein RIF1                           |
| PFC | Module2 | ENSG00000136535 | <i>TBR1</i>      | T-box brain protein 1                                      |
| PFC | Module2 | ENSG00000163516 | <i>ANKZF1</i>    | Ankyrin repeat and zinc finger domain-containing protein 1 |
| PFC | Module2 | ENSG00000068697 | <i>LAPTM4A</i>   | Lysosomal-associated transmembrane protein 4A              |
| PFC | Module2 | ENSG00000200003 | –                | U6 spliceosomal RNA                                        |
| PFC | Module2 | ENSG00000136709 | <i>WDR33</i>     | WD repeat-containing protein 33                            |
| PFC | Module2 | ENSG00000013441 | <i>CLK1</i>      | Dual specificity protein kinase CLK1                       |
| PFC | Module2 | ENSG00000144445 | <i>C2orf67</i>   | Uncharacterized protein C2orf67                            |
| PFC | Module2 | ENSG00000125970 | <i>RALY</i>      | RNA-binding protein Raly                                   |
| PFC | Module2 | ENSG00000101442 | <i>ACTR5</i>     | Actin-related protein 5                                    |
| PFC | Module2 | ENSG00000101109 | <i>STK4</i>      | Serine/threonine-protein kinase 4                          |
| PFC | Module2 | ENSG00000124171 | <i>PARD6B</i>    | Partitioning defective 6 homolog beta                      |
| PFC | Module2 | ENSG00000149634 | <i>C20orf165</i> | Uncharacterized protein C20orf165                          |
| PFC | Module2 | ENSG00000182541 | <i>LIMK2</i>     | LIM domain kinase 2                                        |
| PFC | Module2 | ENSG00000173200 | <i>PARP15</i>    | Poly polymerase 15                                         |
| PFC | Module2 | ENSG00000155893 | <i>ACPL2</i>     | Acid phosphatase-like protein 2 Precursor                  |
| PFC | Module2 | ENSG00000176142 | <i>TMEM39A</i>   | Transmembrane protein 39A                                  |
| PFC | Module2 | ENSG00000138231 | <i>DBR1</i>      | Lariat debranching enzyme                                  |
| PFC | Module2 | ENSG00000114127 | <i>XRNI</i>      | 5'-3' exoribonuclease 1                                    |
| PFC | Module2 | ENSG00000157796 | <i>WDR19</i>     | WD repeat-containing protein 19                            |
| PFC | Module2 | ENSG00000118762 | <i>PKD2</i>      | Polycystin-2                                               |
| PFC | Module2 | ENSG00000077684 | <i>PHF17</i>     | Protein Jade-1                                             |
| PFC | Module2 | ENSG00000083896 | <i>YTHDC1</i>    | YTH domain-containing protein 1                            |
| PFC | Module2 | ENSG00000163297 | <i>ANTXR2</i>    | Anthrax toxin receptor 2 Precursor                         |
| PFC | Module2 | ENSG00000169836 | <i>TACR3</i>     | Neuromedin-K receptor                                      |
| PFC | Module2 | ENSG00000109771 | <i>LRP2BP</i>    | LRP2-binding protein                                       |
| PFC | Module2 | ENSG00000122008 | <i>POLK</i>      | DNA polymerase kappa                                       |
| PFC | Module2 | ENSG00000133302 | <i>ANKRD32</i>   | Ankyrin repeat domain-containing protein 32                |
| PFC | Module2 | ENSG00000112855 | <i>HARS2</i>     | Probable histidyl-tRNA synthetase, mitochondrial Precursor |
| PFC | Module2 | ENSG00000113272 | <i>THG1L</i>     | Probable tRNA                                              |
| PFC | Module2 | ENSG00000113328 | <i>CCNG1</i>     | Cyclin-G1                                                  |
| PFC | Module2 | ENSG00000145780 | <i>FEM1C</i>     | Protein fem-1 homolog C                                    |
| PFC | Module2 | ENSG00000168944 | <i>CEP120</i>    | Centrosomal protein of 120 kDa                             |
| PFC | Module2 | ENSG00000131504 | <i>DIAPH1</i>    | Protein diaphanous homolog 1                               |
| PFC | Module2 | ENSG00000155868 | <i>MED7</i>      | Mediator of RNA polymerase II transcription subunit 7      |
| PFC | Module2 | ENSG00000026950 | <i>BTN3A1</i>    | Butyrophilin subfamily 3 member A1 Precursor               |
| PFC | Module2 | ENSG00000118518 | <i>RNF146</i>    | RING finger protein 146                                    |
| PFC | Module2 | ENSG00000213066 | <i>FGFR1OP</i>   | FGFR1 oncogene partner                                     |

|     |         |                 |                 |                                                                        |
|-----|---------|-----------------|-----------------|------------------------------------------------------------------------|
| PFC | Module2 | ENSG00000158691 | <i>ZSCAN12</i>  | Zinc finger and SCAN domain-containing protein 12                      |
| PFC | Module2 | ENSG00000096060 | <i>FKBP5</i>    | FK506-binding protein 5                                                |
| PFC | Module2 | ENSG00000146247 | <i>PHIP</i>     | PH-interacting protein                                                 |
| PFC | Module2 | ENSG00000135338 | <i>LCA5</i>     | Lebercilin                                                             |
| PFC | Module2 | ENSG00000013375 | <i>PGM3</i>     | Phosphoacetylglucosamine mutase                                        |
| PFC | Module2 | ENSG00000074935 | <i>TUBE1</i>    | Tubulin epsilon chain                                                  |
| PFC | Module2 | ENSG00000135597 | <i>REPS1</i>    | RalBP1-associated Eps domain-containing protein 1                      |
| PFC | Module2 | ENSG00000186625 | <i>KATNA1</i>   | Katanin p60 ATPase-containing subunit A1                               |
| PFC | Module2 | ENSG00000159840 | <i>ZYX</i>      | Zyxin                                                                  |
| PFC | Module2 | ENSG00000034677 | <i>RNF19A</i>   | E3 ubiquitin-protein ligase RNF19A                                     |
| PFC | Module2 | ENSG00000122729 | <i>ACO1</i>     | Cytoplasmic aconitate hydratase                                        |
| PFC | Module2 | ENSG00000178966 | <i>RMI1</i>     | RecQ-mediated genome instability protein 1                             |
| PFC | Module2 | ENSG00000119397 | <i>CEP110</i>   | Centriolin                                                             |
| PFC | Module2 | ENSG00000083223 | <i>ZCCHC6</i>   | Zinc finger CCHC domain-containing protein 6                           |
| PFC | Module2 | ENSG00000046651 | <i>OFD1</i>     | Oral-facial-digital syndrome 1 protein                                 |
| PFC | Module2 | ENSG00000102007 | <i>PLP2</i>     | Proteolipid protein 2                                                  |
| PFC | Module2 | ENSG00000184634 | <i>MED12</i>    | Mediator of RNA polymerase II transcription subunit 12                 |
| PFC | Module2 | ENSG00000196440 | <i>CXorf35</i>  | —                                                                      |
| PFC | Module2 | ENSG00000208964 | —               | —                                                                      |
| PFC | Module2 | ENSG00000125676 | <i>THOC2</i>    | THO complex subunit 2                                                  |
| PFC | Module2 | ENSG00000117360 | <i>PRPF3</i>    | U4/U6 small nuclear ribonucleoprotein Prp3                             |
| PFC | Module2 | ENSG00000187049 | <i>TMEM216</i>  | Transmembrane protein 216                                              |
| PFC | Module2 | ENSG00000120832 | <i>MTERFD3</i>  | mTERF domain-containing protein 3, mitochondrial Precursor             |
| PFC | Module2 | ENSG00000136104 | <i>RNASEH2B</i> | Ribonuclease H2 subunit B                                              |
| PFC | Module2 | ENSG00000102699 | <i>PARP4</i>    | Poly polymerase 4                                                      |
| PFC | Module2 | ENSG00000173575 | <i>CHD2</i>     | Chromodomain-helicase-DNA-binding protein 2                            |
| PFC | Module2 | ENSG00000140199 | <i>SLC12A6</i>  | Solute carrier family 12 member 6                                      |
| PFC | Module2 | ENSG00000120318 | <i>ARAP3</i>    | Arf-GAP, Rho-GAP domain, ANK repeat and PH domain-containing protein 3 |
| PFC | Module3 | ENSG00000117154 | <i>IGSF21</i>   | Immunoglobulin superfamily member 21 Precursor                         |
| PFC | Module3 | ENSG00000117411 | <i>B4GALT2</i>  | Beta-1,4-galactosyltransferase 2                                       |
| PFC | Module3 | ENSG00000117114 | <i>LPHN2</i>    | Latrophilin-2 Precursor                                                |
| PFC | Module3 | ENSG00000117600 | —               | Lipid phosphate phosphatase-related protein type 4                     |
| PFC | Module3 | ENSG00000162636 | <i>FAM102B</i>  | Protein FAM102B                                                        |
| PFC | Module3 | ENSG00000174151 | <i>CYB561D1</i> | Cytochrome b561 domain-containing protein 1                            |
| PFC | Module3 | ENSG00000203685 | <i>C1orf95</i>  | Uncharacterized membrane protein C1orf95                               |
| PFC | Module3 | ENSG00000143195 | <i>ILDR2</i>    | Immunoglobulin-like domain-containing receptor 2                       |
| PFC | Module3 | ENSG00000168243 | <i>GNG4</i>     | Guanine nucleotide-binding protein G                                   |
| PFC | Module3 | ENSG00000198879 | <i>SFMBT2</i>   | Scm-like with four MBT domains protein 2                               |
| PFC | Module3 | ENSG00000150275 | <i>PCDH15</i>   | Protocadherin-15 Precursor                                             |
| PFC | Module3 | ENSG00000182667 | <i>OPCML</i>    | Neurotrimin Precursor                                                  |
| PFC | Module3 | ENSG00000051009 | <i>FAM160A2</i> | UPF0518 protein FAM160A2                                               |
| PFC | Module3 | ENSG00000110400 | <i>PVRL1</i>    | Poliovirus receptor-related protein 1 Precursor                        |
| PFC | Module3 | ENSG00000166257 | <i>SCN3B</i>    | Sodium channel subunit beta-3 Precursor                                |
| PFC | Module3 | ENSG00000123352 | <i>SPATS2</i>   | Spermatogenesis-associated serine-rich protein 2                       |

|     |         |                 |                 |                                                                                                             |
|-----|---------|-----------------|-----------------|-------------------------------------------------------------------------------------------------------------|
| PFC | Module3 | ENSG00000176871 | <i>WSB2</i>     | WD repeat and SOCS box-containing protein 2                                                                 |
| PFC | Module3 | ENSG00000041515 | <i>MYO16</i>    | Myosin-XVI                                                                                                  |
| PFC | Module3 | ENSG00000133083 | <i>DCLK1</i>    | Serine/threonine-protein kinase DCLK1                                                                       |
| PFC | Module3 | ENSG00000089723 | <i>OTUB2</i>    | Ubiquitin thioesterase OTUB2                                                                                |
| PFC | Module3 | ENSG00000100678 | <i>SLC8A3</i>   | Sodium/calcium exchanger 3 Precursor                                                                        |
| PFC | Module3 | ENSG00000119682 | <i>KIAA0317</i> | Protein KIAA0317                                                                                            |
| PFC | Module3 | ENSG00000198752 | –               | Serine/threonine-protein kinase MRCK beta                                                                   |
| PFC | Module3 | ENSG00000187446 | –               | Calcium-binding protein p22                                                                                 |
| PFC | Module3 | ENSG00000140557 | <i>ST8SIA2</i>  | Alpha-2,8-sialyltransferase 8B                                                                              |
| PFC | Module3 | ENSG00000166206 | <i>GABRB3</i>   | Gamma-aminobutyric acid receptor subunit beta-3 Precursor                                                   |
| PFC | Module3 | ENSG00000137817 | <i>PARP6</i>    | Poly polymerase 6                                                                                           |
| PFC | Module3 | ENSG00000169783 | <i>LINGO1</i>   | Leucine-rich repeat and immunoglobulin-like domain-containing nogo receptor-interacting protein 1 Precursor |
| PFC | Module3 | ENSG00000103942 | <i>HOMER2</i>   | Homer protein homolog 2                                                                                     |
| PFC | Module3 | ENSG00000140945 | <i>CDH13</i>    | Cadherin-13 Precursor                                                                                       |
| PFC | Module3 | ENSG00000150394 | <i>CDH8</i>     | Cadherin-8 Precursor                                                                                        |
| PFC | Module3 | ENSG00000140937 | <i>CDH11</i>    | Cadherin-11 Precursor                                                                                       |
| PFC | Module3 | ENSG00000161958 | <i>FGF11</i>    | Fibroblast growth factor 11                                                                                 |
| PFC | Module3 | ENSG00000168256 | <i>NKIRAS2</i>  | NF-kappa-B inhibitor-interacting Ras-like protein 2                                                         |
| PFC | Module3 | ENSG00000141485 | <i>SLC13A5</i>  | Solute carrier family 13 member 5                                                                           |
| PFC | Module3 | ENSG00000063015 | <i>SEZ6</i>     | Seizure protein 6 homolog Precursor                                                                         |
| PFC | Module3 | ENSG00000108960 | <i>MMD</i>      | Monocyte to macrophage differentiation protein                                                              |
| PFC | Module3 | ENSG00000168675 | <i>C18orf1</i>  | Uncharacterized protein C18orf1                                                                             |
| PFC | Module3 | ENSG00000141431 | <i>ASXL3</i>    | Putative Polycomb group protein ASXL3                                                                       |
| PFC | Module3 | ENSG00000166974 | <i>MAPRE2</i>   | Microtubule-associated protein RP/EB family member 2                                                        |
| PFC | Module3 | ENSG00000105270 | <i>CLIP3</i>    | CAP-Gly domain-containing linker protein 3                                                                  |
| PFC | Module3 | ENSG00000129990 | <i>SYT5</i>     | Synaptotagmin-5                                                                                             |
| PFC | Module3 | ENSG00000133265 | <i>HSPBP1</i>   | Hsp70-binding protein 1                                                                                     |
| PFC | Module3 | ENSG00000151693 | <i>ASAP2</i>    | Arf-GAP with SH3 domain, ANK repeat and PH domain-containing protein 2                                      |
| PFC | Module3 | ENSG00000157851 | <i>DPYSL5</i>   | Dihydropyrimidinase-related protein 5                                                                       |
| PFC | Module3 | ENSG00000170340 | <i>B3GNT2</i>   | UDP-GlcNAc:betaGal beta-1,3-N-acetylglucosaminyltransferase 2                                               |
| PFC | Module3 | ENSG00000114999 | <i>TTL</i>      | Tubulin--tyrosine ligase                                                                                    |
| PFC | Module3 | ENSG00000144230 | <i>GPR17</i>    | Uracil nucleotide/cysteinyl leukotriene receptor                                                            |
| PFC | Module3 | ENSG00000187123 | <i>LYPD6</i>    | Ly6/PLAUR domain-containing protein 6 Precursor                                                             |
| PFC | Module3 | ENSG00000163249 | <i>CCNYL1</i>   | Cyclin-Y-like protein 1                                                                                     |
| PFC | Module3 | ENSG00000114923 | <i>SLC4A3</i>   | Anion exchange protein 3                                                                                    |
| PFC | Module3 | ENSG00000152128 | <i>TMEM163</i>  | Transmembrane protein 163                                                                                   |
| PFC | Module3 | ENSG00000177519 | <i>RPRM</i>     | Protein reprimo                                                                                             |
| PFC | Module3 | ENSG00000118263 | <i>KLF7</i>     | Krueppel-like factor 7                                                                                      |
| PFC | Module3 | ENSG00000171951 | <i>SCG2</i>     | Secretogranin-2 Precursor                                                                                   |
| PFC | Module3 | ENSG00000187957 | <i>DNER</i>     | Delta and Notch-like epidermal growth factor-related receptor Precursor                                     |
| PFC | Module3 | ENSG00000101349 | <i>PAK7</i>     | Serine/threonine-protein kinase PAK 7                                                                       |
| PFC | Module3 | ENSG00000026559 | <i>KCNGB1</i>   | Potassium voltage-gated channel subfamily G member 1                                                        |
| PFC | Module3 | ENSG00000154639 | <i>CXADRP2</i>  | Coxsackievirus and adenovirus receptor Precursor                                                            |
| PFC | Module3 | ENSG00000100095 | <i>SEZ6L</i>    | Seizure 6-like protein Precursor                                                                            |



|     |         |                 |                 |                                                                     |
|-----|---------|-----------------|-----------------|---------------------------------------------------------------------|
| PFC | Module3 | ENSG00000128203 | <i>ASPHD2</i>   | Aspartate beta-hydroxylase domain-containing protein 2              |
| PFC | Module3 | ENSG00000011198 | <i>ABHD5</i>    | 1-acylglycerol-3-phosphate O-acyltransferase ABHD5                  |
| PFC | Module3 | ENSG00000144724 | <i>PTPRG</i>    | Receptor-type tyrosine-protein phosphatase gamma Precursor          |
| PFC | Module3 | ENSG00000183662 | <i>FAM19A1</i>  | Protein FAM19A1 Precursor                                           |
| PFC | Module3 | ENSG00000134072 | <i>CAMK1</i>    | Calcium/calmodulin-dependent protein kinase type 1                  |
| PFC | Module3 | ENSG00000163637 | <i>PRICKLE2</i> | Prickle-like protein 2                                              |
| PFC | Module3 | ENSG00000004399 | <i>PLXND1</i>   | Plexin-D1 Precursor                                                 |
| PFC | Module3 | ENSG00000157005 | <i>SST</i>      | Somatostatin Precursor                                              |
| PFC | Module3 | ENSG00000145147 | <i>SLIT2</i>    | Slit homolog 2 protein Precursor                                    |
| PFC | Module3 | ENSG00000174145 | <i>KIAA1239</i> | Leucine-rich repeat and WD repeat-containing protein KIAA1239       |
| PFC | Module3 | ENSG00000134853 | <i>PDGFRA</i>   | Alpha-type platelet-derived growth factor receptor Precursor        |
| PFC | Module3 | ENSG00000174473 | <i>GALNTL6</i>  | Polypeptide N-acetylgalactosaminyltransferase-like 6                |
| PFC | Module3 | ENSG00000218336 | <i>ODZ3</i>     | Teneurin-3                                                          |
| PFC | Module3 | ENSG00000071127 | <i>WDR1</i>     | WD repeat-containing protein 1                                      |
| PFC | Module3 | ENSG00000113389 | <i>NPR3</i>     | Atrial natriuretic peptide clearance receptor Precursor             |
| PFC | Module3 | ENSG00000134982 | <i>APC</i>      | Adenomatous polyposis coli protein                                  |
| PFC | Module3 | ENSG00000112902 | <i>SEMA5A</i>   | Semaphorin-5A Precursor                                             |
| PFC | Module3 | ENSG00000040731 | <i>CDH10</i>    | Cadherin-10 Precursor                                               |
| PFC | Module3 | ENSG00000145632 | <i>PLK2</i>     | Serine/threonine-protein kinase PLK2                                |
| PFC | Module3 | ENSG00000145681 | <i>HAPLN1</i>   | Hyaluronan and proteoglycan link protein 1 Precursor                |
| PFC | Module3 | ENSG00000197283 | <i>SYNGAP1</i>  | Ras GTPase-activating protein SynGAP                                |
| PFC | Module3 | ENSG00000133627 | <i>ACTR3B</i>   | Actin-related protein 3B                                            |
| PFC | Module3 | ENSG00000153814 | <i>JAZF1</i>    | Juxtaposed with another zinc finger protein 1                       |
| PFC | Module3 | ENSG00000153956 | <i>CACNA2D1</i> | Voltage-dependent calcium channel subunit alpha-2/delta-1 Precursor |
| PFC | Module3 | ENSG00000105887 | <i>LUZP6</i>    | Myotrophin                                                          |
| PFC | Module3 | ENSG00000157168 | <i>NRG1</i>     | Pro-neuregulin-1, membrane-bound isoform Precursor                  |
| PFC | Module3 | ENSG00000165084 | <i>C8orf34</i>  | Uncharacterized protein C8orf34                                     |
| PFC | Module3 | ENSG00000104435 | <i>STMN2</i>    | Stathmin-2                                                          |
| PFC | Module3 | ENSG00000184156 | <i>KCNQ3</i>    | Potassium voltage-gated channel subfamily KQT member 3              |
| PFC | Module3 | ENSG00000147852 | <i>VLDLR</i>    | Very low-density lipoprotein receptor Precursor                     |
| PFC | Module3 | ENSG00000137094 | <i>DNAJB5</i>   | DnaJ homolog subfamily B member 5                                   |
| PFC | Module3 | ENSG00000107282 | <i>APBA1</i>    | Amyloid beta A4 precursor protein-binding family A member 1         |
| PFC | Module3 | ENSG00000198785 | <i>GRIN3A</i>   | Glutamate receptor subunit 3A Precursor                             |
| PFC | Module3 | ENSG00000165802 | <i>NELF</i>     | Nasal embryonic luteinizing hormone-releasing hormone factor        |
| PFC | Module3 | ENSG00000101911 | <i>PRPS2</i>    | Ribose-phosphate pyrophosphokinase 2                                |
| PFC | Module3 | ENSG00000077264 | <i>PAK3</i>     | Serine/threonine-protein kinase PAK 3                               |
| PFC | Module3 | ENSG00000185985 | <i>SLITRK2</i>  | SLIT and NTRK-like protein 2 Precursor                              |
| PFC | Module3 | ENSG00000147044 | <i>CASK</i>     | Peripheral plasma membrane protein CASK                             |
| PFC | Module3 | ENSG00000171357 | <i>C1orf190</i> | Uncharacterized protein C1orf190                                    |
| PFC | Module3 | ENSG00000132692 | <i>BCAN</i>     | Brevican core protein Precursor                                     |
| PFC | Module3 | ENSG00000132334 | <i>PTPRE</i>    | Receptor-type tyrosine-protein phosphatase epsilon Precursor        |
| PFC | Module3 | ENSG00000111145 | <i>ELK3</i>     | ETS domain-containing protein Elk-3                                 |
| PFC | Module3 | ENSG00000064726 | <i>BTBD1</i>    | BTB/POZ domain-containing protein 1                                 |
| PFC | Module3 | ENSG00000090674 | <i>MCOLN1</i>   | Mucolipin-1                                                         |
| PFC | Module3 | ENSG00000105568 | <i>PPP2R1A</i>  | Serine/threonine-protein phosphatase 2A 65 kDa regulatory subunit A |

|     |         |                 |                 |                                                            |
|-----|---------|-----------------|-----------------|------------------------------------------------------------|
|     |         |                 |                 | alpha isoform                                              |
| PFC | Module3 | ENSG00000089057 | <i>SLC23A2</i>  | Solute carrier family 23 member 2                          |
| PFC | Module3 | ENSG00000156299 | <i>TIAM1</i>    | T-lymphoma invasion and metastasis-inducing protein 1      |
| PFC | Module3 | ENSG00000214021 | <i>TTLL3</i>    | Tubulin--tyrosine ligase-like protein 3                    |
| PFC | Module3 | ENSG00000114853 | <i>ZBTB47</i>   | Zinc finger and BTB domain-containing protein 47           |
| PFC | Module3 | ENSG00000114867 | <i>EIF4G1</i>   | Eukaryotic translation initiation factor 4 gamma 1         |
| PFC | Module3 | ENSG00000164086 | <i>DUSP7</i>    | Dual specificity protein phosphatase 7                     |
| PFC | Module3 | ENSG00000114686 | <i>MRPL3</i>    | 39S ribosomal protein L3, mitochondrial                    |
| PFC | Module3 | ENSG00000145708 | <i>CRHBP</i>    | Corticotropin-releasing factor-binding protein Precursor   |
| PFC | Module3 | ENSG00000164466 | <i>SFXN1</i>    | Sideroflexin-1                                             |
| PFC | Module3 | ENSG00000198729 | <i>PPP1R14C</i> | Protein phosphatase 1 regulatory subunit 14C               |
| PFC | Module3 | ENSG00000196358 | <i>NTNG2</i>    | Netrin-G2 Precursor                                        |
| PFC | Module3 | ENSG00000152382 | <i>TADA1L</i>   | Transcriptional adapter 1-like protein                     |
| PFC | Module4 | ENSG00000168710 | <i>AHCYL1</i>   | Putative adenosylhomocysteinase 2                          |
| PFC | Module4 | ENSG00000148482 | <i>SLC39A12</i> | Zinc transporter ZIP12                                     |
| PFC | Module4 | ENSG00000148700 | <i>ADD3</i>     | Gamma-adducin                                              |
| PFC | Module4 | ENSG00000133789 | <i>SWAP70</i>   | Switch-associated protein 70                               |
| PFC | Module4 | ENSG00000148935 | <i>GAS2</i>     | Growth arrest-specific protein 2                           |
| PFC | Module4 | ENSG00000166535 | <i>A2ML1</i>    | Alpha-2-macroglobulin-like protein 1 Precursor             |
| PFC | Module4 | ENSG00000167779 | <i>IGFBP6</i>   | Insulin-like growth factor-binding protein 6 Precursor     |
| PFC | Module4 | ENSG00000139190 | <i>VAMP1</i>    | Vesicle-associated membrane protein 1                      |
| PFC | Module4 | ENSG00000186031 | <i>FMN1</i>     | Formin-1                                                   |
| PFC | Module4 | ENSG00000171766 | <i>GATM</i>     | Glycine amidinotransferase, mitochondrial Precursor        |
| PFC | Module4 | ENSG00000166848 | <i>TERF2IP</i>  | Telomeric repeat-binding factor 2-interacting protein 1    |
| PFC | Module4 | ENSG00000141314 | <i>RHBDL3</i>   | Rhomboid-related protein 3                                 |
| PFC | Module4 | ENSG00000131095 | <i>GFAP</i>     | Glial fibrillary acidic protein                            |
| PFC | Module4 | ENSG00000105711 | <i>SCN1B</i>    | Sodium channel subunit beta-1 Precursor                    |
| PFC | Module4 | ENSG00000134324 | <i>LPIN1</i>    | Lipin-1                                                    |
| PFC | Module4 | ENSG00000138448 | <i>ITGAV</i>    | Integrin alpha-V Precursor                                 |
| PFC | Module4 | ENSG00000138378 | <i>STAT4</i>    | Signal transducer and activator of transcription 4         |
| PFC | Module4 | ENSG00000100307 | <i>CBX7</i>     | Chromobox protein homolog 7                                |
| PFC | Module4 | ENSG00000114166 | <i>KAT2B</i>    | Histone acetyltransferase PCAF                             |
| PFC | Module4 | ENSG00000213672 | <i>NCKIPSD</i>  | NCK-interacting protein with SH3 domain                    |
| PFC | Module4 | ENSG00000114126 | <i>TFDP2</i>    | Transcription factor Dp-2                                  |
| PFC | Module4 | ENSG00000013293 | <i>SLC7A14</i>  | Probable cationic amino acid transporter                   |
| PFC | Module4 | ENSG00000138639 | <i>ARHGAP24</i> | Rho GTPase-activating protein 24                           |
| PFC | Module4 | ENSG00000145390 | <i>USP53</i>    | Inactive ubiquitin carboxyl-terminal hydrolase 53          |
| PFC | Module4 | ENSG00000171476 | <i>HOPX</i>     | Homeodomain-only protein                                   |
| PFC | Module4 | ENSG00000151623 | <i>NR3C2</i>    | Mineralocorticoid receptor                                 |
| PFC | Module4 | ENSG00000145715 | <i>RASA1</i>    | Ras GTPase-activating protein 1                            |
| PFC | Module4 | ENSG00000043143 | <i>PHF15</i>    | Protein Jade-2                                             |
| PFC | Module4 | ENSG00000113327 | <i>GABRG2</i>   | Gamma-aminobutyric acid receptor subunit gamma-2 Precursor |
| PFC | Module4 | ENSG00000153291 | <i>SLC25A27</i> | Mitochondrial uncoupling protein 4                         |
| PFC | Module4 | ENSG00000024862 | <i>CCDC28A</i>  | Coiled-coil domain-containing protein 28A                  |
| PFC | Module4 | ENSG00000078269 | <i>SYNJ2</i>    | Synaptojanin-2                                             |

|     |         |                 |                 |                                                                          |
|-----|---------|-----------------|-----------------|--------------------------------------------------------------------------|
| PFC | Module4 | ENSG00000132429 | <i>POPDC3</i>   | Popeye domain-containing protein 3                                       |
| PFC | Module4 | ENSG00000001631 | <i>KRIT1</i>    | Krev interaction trapped protein 1                                       |
| PFC | Module4 | ENSG00000104728 | <i>ARHGEF10</i> | Rho guanine nucleotide exchange factor 10                                |
| PFC | Module4 | ENSG00000169499 | <i>PLEKHA2</i>  | Pleckstrin homology domain-containing family A member 2                  |
| PFC | Module4 | ENSG00000123119 | <i>NECAB1</i>   | N-terminal EF-hand calcium-binding protein 1                             |
| PFC | Module4 | ENSG00000107317 | <i>PTGDS</i>    | Prostaglandin-H2 D-isomerase Precursor                                   |
| PFC | Module4 | ENSG00000175556 | <i>LONRF3</i>   | LON peptidase N-terminal domain and RING finger protein 3                |
| PFC | Module4 | ENSG00000135744 | <i>AGT</i>      | Angiotensinogen Precursor                                                |
| PFC | Module4 | ENSG00000119638 | <i>NEK9</i>     | Serine/threonine-protein kinase Nek9                                     |
| PFC | Module4 | ENSG00000138738 | <i>PRDM5</i>    | PR domain zinc finger protein 5                                          |
| PFC | Module4 | ENSG00000152931 | —               | Prostate-specific and androgen-regulated protein 1                       |
| PFC | Module4 | ENSG00000164199 | <i>GPR98</i>    | G-protein coupled receptor 98 Precursor                                  |
| PFC | Module5 | ENSG00000081760 | <i>AACS</i>     | Acetoacetyl-CoA synthetase                                               |
| PFC | Module5 | ENSG00000108861 | <i>DUSP3</i>    | Dual specificity protein phosphatase 3                                   |
| PFC | Module5 | ENSG00000116016 | <i>EPAS1</i>    | Endothelial PAS domain-containing protein 1                              |
| PFC | Module5 | ENSG00000184160 | <i>ADRA2C</i>   | Alpha-2C adrenergic receptor                                             |
| PFC | Module5 | ENSG00000150627 | <i>WDR17</i>    | WD repeat-containing protein 17                                          |
| PFC | Module5 | ENSG00000186479 | <i>RGS7BP</i>   | Regulator of G-protein signaling 7-binding protein                       |
| PFC | Module5 | ENSG00000112335 | <i>SNX3</i>     | Sorting nexin-3                                                          |
| PFC | Module5 | ENSG00000158008 | <i>EXTL1</i>    | Exostosin-like 1                                                         |
| PFC | Module5 | ENSG00000143126 | <i>CELSR2</i>   | Cadherin EGF LAG seven-pass G-type receptor 2 Precursor                  |
| PFC | Module5 | ENSG00000165757 | <i>KIAA1462</i> | Uncharacterized protein KIAA1462                                         |
| PFC | Module5 | ENSG00000134343 | <i>ANO3</i>     | Anoctamin-3                                                              |
| PFC | Module5 | ENSG00000149091 | <i>DGKZ</i>     | Diacylglycerol kinase zeta                                               |
| PFC | Module5 | ENSG00000179292 | <i>TMEM151A</i> | Transmembrane protein 151A                                               |
| PFC | Module5 | ENSG00000154146 | <i>NRGN</i>     | Neurogranin                                                              |
| PFC | Module5 | ENSG00000135119 | <i>RNFT2</i>    | Ring finger and transmembrane domain-containing protein 2                |
| PFC | Module5 | ENSG00000181418 | <i>DDN</i>      | Dendrin                                                                  |
| PFC | Module5 | ENSG00000110931 | <i>CAMKK2</i>   | Calcium/calmodulin-dependent protein kinase kinase 2                     |
| PFC | Module5 | ENSG00000036530 | <i>CYP46A1</i>  | Cholesterol 24-hydroxylase                                               |
| PFC | Module5 | ENSG00000100711 | <i>ZFYVE21</i>  | Zinc finger FYVE domain-containing protein 21                            |
| PFC | Module5 | ENSG00000092445 | <i>TYRO3</i>    | Tyrosine-protein kinase receptor TYRO3 Precursor                         |
| PFC | Module5 | ENSG00000171914 | <i>TLN2</i>     | Talin-2                                                                  |
| PFC | Module5 | ENSG00000166949 | <i>SMAD3</i>    | Mothers against decapentaplegic homolog 3                                |
| PFC | Module5 | ENSG00000172575 | <i>RASGRP1</i>  | RAS guanyl-releasing protein 1                                           |
| PFC | Module5 | ENSG00000156642 | <i>NPTN</i>     | Neuroplastin Precursor                                                   |
| PFC | Module5 | ENSG00000090581 | <i>GNPTG</i>    | N-acetylglucosamine-1-phosphotransferase subunit gamma Precursor         |
| PFC | Module5 | ENSG00000073670 | <i>ADAM11</i>   | Disintegrin and metalloproteinase domain-containing protein 11 Precursor |
| PFC | Module5 | ENSG00000133026 | <i>MYH10</i>    | Myosin-10                                                                |
| PFC | Module5 | ENSG00000144357 | <i>UBR3</i>     | E3 ubiquitin-protein ligase UBR3                                         |
| PFC | Module5 | ENSG00000204262 | <i>COL5A2</i>   | Collagen alpha-2                                                         |
| PFC | Module5 | ENSG00000135919 | <i>SERPINE2</i> | Glia-derived nexin Precursor                                             |
| PFC | Module5 | ENSG00000198792 | <i>TMEM184B</i> | Transmembrane protein 184B                                               |
| PFC | Module5 | ENSG00000138944 | <i>KIAA1644</i> | Uncharacterized protein KIAA1644 Precursor                               |

|     |         |                 |                 |                                                                                 |
|-----|---------|-----------------|-----------------|---------------------------------------------------------------------------------|
| PFC | Module5 | ENSG00000182247 | <i>UBE2E2</i>   | Ubiquitin-conjugating enzyme E2 E2                                              |
| PFC | Module5 | ENSG00000164061 | <i>BSN</i>      | Protein bassoon                                                                 |
| PFC | Module5 | ENSG00000163704 | <i>PRRT3</i>    | Proline-rich transmembrane protein 3 Precursor                                  |
| PFC | Module5 | ENSG00000145451 | <i>GLRA3</i>    | Glycine receptor subunit alpha-3 Precursor                                      |
| PFC | Module5 | ENSG00000065833 | <i>ME1</i>      | NADP-dependent malic enzyme                                                     |
| PFC | Module5 | ENSG00000071189 | <i>SNX13</i>    | Sorting nexin-13                                                                |
| PFC | Module5 | ENSG00000169085 | <i>C8orf46</i>  | Uncharacterized protein C8orf46                                                 |
| PFC | Module5 | ENSG00000169933 | <i>FRMPD4</i>   | FERM and PDZ domain-containing protein 4                                        |
| PFC | Module5 | ENSG00000102385 | <i>DRP2</i>     | Dystrophin-related protein 2                                                    |
| PFC | Module5 | ENSG00000102003 | <i>SYP</i>      | Synaptophysin                                                                   |
| PFC | Module5 | ENSG00000124313 | <i>IQSEC2</i>   | IQ motif and SEC7 domain-containing protein 2                                   |
| CBC | Module1 | ENSG00000162889 | <i>MAPKAPK2</i> | MAP kinase-activated protein kinase 2                                           |
| CBC | Module1 | ENSG00000066027 | <i>PPP2R5A</i>  | Serine/threonine-protein phosphatase 2A 56 kDa regulatory subunit alpha isoform |
| CBC | Module1 | ENSG00000162511 | <i>LAPTM5</i>   | Lysosomal-associated transmembrane protein 5                                    |
| CBC | Module1 | ENSG00000126067 | <i>PSMB2</i>    | Proteasome subunit beta type-2                                                  |
| CBC | Module1 | ENSG00000116791 | <i>CRYZ</i>     | Quinone oxidoreductase                                                          |
| CBC | Module1 | ENSG00000117500 | <i>TMED5</i>    | Transmembrane emp24 domain-containing protein 5 Precursor                       |
| CBC | Module1 | ENSG00000143502 | <i>SUSD4</i>    | Sushi domain-containing protein 4 Precursor                                     |
| CBC | Module1 | ENSG00000165443 | <i>PHYHIPL</i>  | Phytanoyl-CoA hydroxylase-interacting protein-like                              |
| CBC | Module1 | ENSG00000166348 | <i>USP54</i>    | Inactive ubiquitin carboxyl-terminal hydrolase 54                               |
| CBC | Module1 | ENSG00000107554 | <i>DNMBP</i>    | Dynamin-binding protein                                                         |
| CBC | Module1 | ENSG00000133789 | <i>SWAP70</i>   | Switch-associated protein 70                                                    |
| CBC | Module1 | ENSG00000187240 | <i>DYNC2H1</i>  | Cytoplasmic dynein 2 heavy chain 1                                              |
| CBC | Module1 | ENSG00000188906 | <i>LRK2</i>     | Leucine-rich repeat serine/threonine-protein kinase 2                           |
| CBC | Module1 | ENSG00000119242 | <i>CCDC92</i>   | Coiled-coil domain-containing protein 92                                        |
| CBC | Module1 | ENSG00000088387 | <i>DOCK9</i>    | Dedicator of cytokinesis protein 9                                              |
| CBC | Module1 | ENSG00000139973 | <i>SYT16</i>    | Synaptotagmin-16                                                                |
| CBC | Module1 | ENSG00000165533 | <i>TTC8</i>     | Tetratricopeptide repeat protein 8                                              |
| CBC | Module1 | ENSG00000072110 | <i>ACTN1</i>    | Alpha-actinin-1                                                                 |
| CBC | Module1 | ENSG00000165929 | <i>TC2N</i>     | Tandem C2 domains nuclear protein                                               |
| CBC | Module1 | ENSG00000187446 | –               | Calcium-binding protein p22                                                     |
| CBC | Module1 | ENSG00000087253 | <i>LPCAT2</i>   | Lysophosphatidylcholine acyltransferase 2                                       |
| CBC | Module1 | ENSG00000140950 | <i>KIAA1609</i> | TLD domain-containing protein KIAA1609                                          |
| CBC | Module1 | ENSG00000167654 | <i>ATCAY</i>    | Caytaxin                                                                        |
| CBC | Module1 | ENSG00000083844 | <i>ZNF264</i>   | Zinc finger protein 264                                                         |
| CBC | Module1 | ENSG00000152527 | <i>PLEKHH2</i>  | Pleckstrin homology domain-containing family H member 2                         |
| CBC | Module1 | ENSG00000135968 | <i>GCC2</i>     | GRIP and coiled-coil domain-containing protein 2                                |
| CBC | Module1 | ENSG00000157557 | <i>ETS2</i>     | Protein C-ets-2                                                                 |
| CBC | Module1 | ENSG00000178075 | <i>GRAMD1C</i>  | GRAM domain-containing protein 1C                                               |
| CBC | Module1 | ENSG00000145012 | <i>LPP</i>      | Lipoma-preferred partner                                                        |
| CBC | Module1 | ENSG00000172667 | <i>ZMAT3</i>    | Zinc finger matrin-type protein 3                                               |
| CBC | Module1 | ENSG00000118785 | <i>SPPI</i>     | Osteopontin Precursor                                                           |
| CBC | Module1 | ENSG00000164116 | <i>GUCY1A3</i>  | Guanylate cyclase soluble subunit alpha-3                                       |
| CBC | Module1 | ENSG00000163285 | <i>GABRG1</i>   | Gamma-aminobutyric acid receptor subunit gamma-1 Precursor                      |

|     |         |                 |                 |                                                                     |
|-----|---------|-----------------|-----------------|---------------------------------------------------------------------|
| CBC | Module1 | ENSG00000145675 | <i>PIK3R1</i>   | Phosphatidylinositol 3-kinase regulatory subunit alpha              |
| CBC | Module1 | ENSG00000145794 | <i>MEGF10</i>   | Multiple epidermal growth factor-like domains 10 Precursor          |
| CBC | Module1 | ENSG00000164616 | <i>FBXL21</i>   | F-box and leucine-rich repeat protein 21                            |
| CBC | Module1 | ENSG00000129625 | <i>REEP5</i>    | Receptor expression-enhancing protein 5                             |
| CBC | Module1 | ENSG00000043462 | <i>LCP2</i>     | Lymphocyte cytosolic protein 2                                      |
| CBC | Module1 | ENSG00000137393 | <i>RNF144B</i>  | E3 ubiquitin-protein ligase RNF144B                                 |
| CBC | Module1 | ENSG00000198721 | <i>PECI</i>     | Peroxisomal 3,2-trans-enoyl-CoA isomerase                           |
| CBC | Module1 | ENSG00000135338 | <i>LCA5</i>     | Lebercilin                                                          |
| CBC | Module1 | ENSG00000136250 | <i>AOAH</i>     | Acylxyacyl hydrolase Precursor                                      |
| CBC | Module1 | ENSG00000147454 | <i>SLC25A37</i> | Mitoferrin-1                                                        |
| CBC | Module1 | ENSG00000104725 | <i>NEFL</i>     | Neurofilament light polypeptide                                     |
| CBC | Module1 | ENSG00000104368 | <i>PLAT</i>     | Tissue-type plasminogen activator Precursor                         |
| CBC | Module1 | ENSG00000198467 | <i>TPM2</i>     | Tropomyosin beta chain                                              |
| CBC | Module1 | ENSG00000188647 | <i>PTAR1</i>    | Protein prenyltransferase alpha subunit repeat-containing protein 1 |
| CBC | Module1 | ENSG00000211044 | –               | –                                                                   |
| CBC | Module1 | ENSG00000117525 | <i>F3</i>       | Tissue factor Precursor                                             |
| CBC | Module1 | ENSG00000122862 | <i>SRGN</i>     | Serglycin Precursor                                                 |
| CBC | Module1 | ENSG00000165322 | <i>ARHGAP12</i> | Rho GTPase-activating protein 12                                    |
| CBC | Module1 | ENSG00000171714 | <i>ANO5</i>     | Anoctamin-5                                                         |
| CBC | Module1 | ENSG00000149084 | <i>HSD17B12</i> | Estradiol 17-beta-dehydrogenase 12                                  |
| CBC | Module1 | ENSG00000134574 | <i>DDB2</i>     | DNA damage-binding protein 2                                        |
| CBC | Module1 | ENSG00000139278 | <i>GLIPR1</i>   | Glioma pathogenesis-related protein 1 Precursor                     |
| CBC | Module1 | ENSG00000110880 | <i>CORO1C</i>   | Coronin-1C                                                          |
| CBC | Module1 | ENSG00000141404 | <i>GNAL</i>     | Guanine nucleotide-binding protein G                                |
| CBC | Module1 | ENSG00000141449 | <i>KIAA1772</i> | GREB1-like protein                                                  |
| CBC | Module1 | ENSG00000154040 | <i>CABYR</i>    | Calcium-binding tyrosine phosphorylation-regulated protein          |
| CBC | Module1 | ENSG00000178662 | <i>CSRNP3</i>   | Cysteine/serine-rich nuclear protein 3                              |
| CBC | Module1 | ENSG00000144285 | <i>SCN1A</i>    | Sodium channel protein type 1 subunit alpha                         |
| CBC | Module1 | ENSG00000124151 | <i>NCOA3</i>    | Nuclear receptor coactivator 3                                      |
| CBC | Module1 | ENSG00000025772 | <i>TOMM34</i>   | Mitochondrial import receptor subunit TOM34                         |
| CBC | Module1 | ENSG00000159128 | <i>IFNGR2</i>   | Interferon-gamma receptor beta chain Precursor                      |
| CBC | Module1 | ENSG00000114439 | <i>BBX</i>      | HMG box transcription factor BBX                                    |
| CBC | Module1 | ENSG00000163840 | <i>DTX3L</i>    | Protein deltex-3-like                                               |
| CBC | Module1 | ENSG00000085276 | <i>MECOM</i>    | Ecotropic virus integration site 1 protein homolog                  |
| CBC | Module1 | ENSG00000164039 | <i>BDH2</i>     | 3-hydroxybutyrate dehydrogenase type 2                              |
| CBC | Module1 | ENSG00000138735 | <i>PDE5A</i>    | cGMP-specific 3',5'-cyclic phosphodiesterase                        |
| CBC | Module1 | ENSG00000197062 | <i>ZNF187</i>   | Zinc finger protein 187                                             |
| CBC | Module1 | ENSG00000112511 | –               | PHD finger protein 1                                                |
| CBC | Module1 | ENSG00000112214 | <i>FHL5</i>     | Four and a half LIM domains protein 5                               |
| CBC | Module1 | ENSG00000146373 | <i>RNF217</i>   | Probable E3 ubiquitin-protein ligase RNF217                         |
| CBC | Module1 | ENSG00000077063 | <i>CTTNBP2</i>  | Cortactin-binding protein 2                                         |
| CBC | Module1 | ENSG00000186591 | <i>UBE2H</i>    | Ubiquitin-conjugating enzyme E2 H                                   |
| CBC | Module1 | ENSG00000105855 | <i>ITGB8</i>    | Integrin beta-8 Precursor                                           |
| CBC | Module1 | ENSG00000094841 | <i>UPRT</i>     | Uracil phosphoribosyltransferase                                    |
| CBC | Module2 | ENSG00000171729 | <i>TMEM51</i>   | Transmembrane protein 51                                            |

|     |         |                 |                  |                                                                                   |
|-----|---------|-----------------|------------------|-----------------------------------------------------------------------------------|
| CBC | Module2 | ENSG00000117154 | <i>IGSF21</i>    | Immunoglobulin superfamily member 21 Precursor                                    |
| CBC | Module2 | ENSG00000117676 | <i>RPS6KA1</i>   | Ribosomal protein S6 kinase alpha-1                                               |
| CBC | Module2 | ENSG00000171385 | <i>KCND3</i>     | Potassium voltage-gated channel subfamily D member 3                              |
| CBC | Module2 | ENSG00000175470 | <i>PPP2R2D</i>   | Serine/threonine-protein phosphatase 2A 55 kDa regulatory subunit B delta isoform |
| CBC | Module2 | ENSG00000168496 | <i>FEN1</i>      | Flap endonuclease 1                                                               |
| CBC | Module2 | ENSG00000066084 | <i>DIP2B</i>     | Disco-interacting protein 2 homolog B                                             |
| CBC | Module2 | ENSG00000135414 | <i>GDF11</i>     | Growth/differentiation factor 11 Precursor                                        |
| CBC | Module2 | ENSG00000072657 | <i>TRHDE</i>     | Thyrotropin-releasing hormone-degrading ectoenzyme                                |
| CBC | Module2 | ENSG00000111684 | –                | Lysophospholipid acyltransferase 5                                                |
| CBC | Module2 | ENSG00000177084 | <i>POLE</i>      | DNA polymerase epsilon catalytic subunit A                                        |
| CBC | Module2 | ENSG00000171723 | <i>GPHN</i>      | Gephyrin                                                                          |
| CBC | Module2 | ENSG00000140455 | <i>USP3</i>      | Ubiquitin carboxyl-terminal hydrolase 3                                           |
| CBC | Module2 | ENSG00000138604 | <i>GLCE</i>      | D-glucuronyl C5-epimerase                                                         |
| CBC | Module2 | ENSG00000169330 | <i>KIAA1024</i>  | UPF0258 protein KIAA1024                                                          |
| CBC | Module2 | ENSG00000080644 | <i>CHRNA3</i>    | Neuronal acetylcholine receptor subunit alpha-3 Precursor                         |
| CBC | Module2 | ENSG00000140873 | <i>ADAMTS18</i>  | A disintegrin and metalloproteinase with thrombospondin motifs 18 Precursor       |
| CBC | Module2 | ENSG00000108375 | <i>RNF43</i>     | RING finger protein 43 Precursor                                                  |
| CBC | Module2 | ENSG00000132646 | <i>PCNA</i>      | Proliferating cell nuclear antigen                                                |
| CBC | Module2 | ENSG00000149639 | <i>C20orf117</i> | Uncharacterized protein C20orf117                                                 |
| CBC | Module2 | ENSG00000011198 | <i>ABHD5</i>     | 1-acylglycerol-3-phosphate O-acyltransferase ABHD5                                |
| CBC | Module2 | ENSG00000152977 | <i>ZIC1</i>      | Zinc finger protein ZIC 1                                                         |
| CBC | Module2 | ENSG00000114767 | <i>RRP9</i>      | U3 small nucleolar RNA-interacting protein 2                                      |
| CBC | Module2 | ENSG00000152208 | <i>GRID2</i>     | Glutamate receptor delta-2 subunit Precursor                                      |
| CBC | Module2 | ENSG00000164100 | <i>NDST3</i>     | Bifunctional heparan sulfate N-deacetylase/N-sulfotransferase 3                   |
| CBC | Module2 | ENSG00000183783 | <i>KCTD8</i>     | BTB/POZ domain-containing protein KCTD8                                           |
| CBC | Module2 | ENSG00000145335 | <i>SNCA</i>      | Alpha-synuclein                                                                   |
| CBC | Module2 | ENSG00000196782 | <i>MAML3</i>     | Mastermind-like protein 3                                                         |
| CBC | Module2 | ENSG00000164418 | <i>GRIK2</i>     | Glutamate receptor, ionotropic kainate 2 Precursor                                |
| CBC | Module2 | ENSG00000160967 | <i>CUX1</i>      | Protein CASP                                                                      |
| CBC | Module2 | ENSG00000185900 | –                | Protein kinase-like protein SgK196                                                |
| CBC | Module2 | ENSG00000196739 | <i>COL27A1</i>   | Collagen alpha-1                                                                  |
| CBC | Module2 | ENSG00000130713 | <i>EXOSC2</i>    | Exosome complex exonuclease RRP4                                                  |
| CBC | Module2 | ENSG00000136805 | <i>C9orf4</i>    | Uncharacterized protein C9orf4                                                    |
| CBC | Module2 | ENSG00000165359 | <i>DDX26B</i>    | Protein DDX26B                                                                    |
| CBC | Module2 | ENSG00000159023 | <i>EPB41</i>     | Protein 4.1                                                                       |
| CBC | Module2 | ENSG00000163462 | <i>TRIM46</i>    | Tripartite motif-containing protein 46                                            |
| CBC | Module2 | ENSG00000213341 | <i>CHUK</i>      | Inhibitor of nuclear factor kappa-B kinase subunit alpha                          |
| CBC | Module2 | ENSG00000070961 | <i>ATP2B1</i>    | Plasma membrane calcium-transporting ATPase 1                                     |
| CBC | Module2 | ENSG00000136112 | –                | –                                                                                 |
| CBC | Module2 | ENSG00000011638 | <i>TMEM159</i>   | Promethin                                                                         |
| CBC | Module2 | ENSG00000176476 | <i>CCDC101</i>   | SAGA-associated factor 29 homolog                                                 |
| CBC | Module2 | ENSG00000089280 | <i>FUS</i>       | RNA-binding protein FUS                                                           |
| CBC | Module2 | ENSG00000141098 | <i>GFOD2</i>     | Glucose-fructose oxidoreductase domain-containing protein 2 Precursor             |
| CBC | Module2 | ENSG00000161647 | <i>MPP3</i>      | MAGUK p55 subfamily member 3                                                      |

|     |         |                 |                 |                                                                             |
|-----|---------|-----------------|-----------------|-----------------------------------------------------------------------------|
| CBC | Module2 | ENSG00000105698 | <i>USF2</i>     | Upstream stimulatory factor 2                                               |
| CBC | Module2 | ENSG00000198633 | <i>ZNF534</i>   | zinc finger protein 534 isoform 2                                           |
| CBC | Module2 | ENSG00000178171 | <i>FAM123C</i>  | Protein FAM123C                                                             |
| CBC | Module2 | ENSG00000048991 | <i>R3HDM1</i>   | R3H domain-containing protein 1                                             |
| CBC | Module2 | ENSG00000135951 | <i>TSGA10</i>   | Testis-specific gene 10 protein                                             |
| CBC | Module2 | ENSG00000153234 | <i>NR4A2</i>    | Nuclear receptor subfamily 4 group A member 2                               |
| CBC | Module2 | ENSG00000130684 | <i>ZNF337</i>   | Zinc finger protein 337                                                     |
| CBC | Module2 | ENSG00000130584 | <i>ZBTB46</i>   | Zinc finger and BTB domain-containing protein 46                            |
| CBC | Module2 | ENSG00000156983 | <i>BRPF1</i>    | Peregrin                                                                    |
| CBC | Module2 | ENSG00000154928 | <i>EPHB1</i>    | Ephrin type-B receptor 1 Precursor                                          |
| CBC | Module2 | ENSG00000206562 | <i>METTL6</i>   | Methyltransferase-like protein 6                                            |
| CBC | Module2 | ENSG00000173011 | –               | Transcriptional adapter 2-beta                                              |
| CBC | Module2 | ENSG00000145536 | <i>ADAMTS16</i> | A disintegrin and metalloproteinase with thrombospondin motifs 16 Precursor |
| CBC | Module2 | ENSG00000040731 | <i>CDH10</i>    | Cadherin-10 Precursor                                                       |
| CBC | Module2 | ENSG00000152822 | <i>GRM1</i>     | Metabotropic glutamate receptor 1 Precursor                                 |
| CBC | Module2 | ENSG00000170260 | <i>ZNF212</i>   | Zinc finger protein 212                                                     |
| CBC | Module2 | ENSG00000164778 | <i>EN2</i>      | Homeobox protein engrailed-2                                                |
| CBC | Module2 | ENSG00000106603 | <i>C7orf44</i>  | Uncharacterized protein C7orf44                                             |
| CBC | Module2 | ENSG00000147724 | <i>FAM135B</i>  | Protein FAM135B                                                             |
| CBC | Module2 | ENSG00000135643 | <i>KCNMB4</i>   | Calcium-activated potassium channel subunit beta-4                          |
| CBC | Module2 | ENSG00000175198 | <i>PCCA</i>     | Propionyl-CoA carboxylase alpha chain, mitochondrial Precursor              |
| CBC | Module2 | ENSG00000171241 | <i>SHCBP1</i>   | SHC SH2 domain-binding protein 1                                            |
| CBC | Module2 | ENSG00000101773 | <i>RBBP8</i>    | Retinoblastoma-binding protein 8                                            |
| CBC | Module2 | ENSG00000151693 | <i>ASAP2</i>    | Arf-GAP with SH3 domain, ANK repeat and PH domain-containing protein 2      |
| CBC | Module2 | ENSG00000135074 | <i>ADAM19</i>   | Disintegrin and metalloproteinase domain-containing protein 19 Precursor    |
| CBC | Module2 | ENSG00000013392 | <i>RWDD2A</i>   | RWD domain-containing protein 2A                                            |

**Table S6. Numbers of probes used in gene expression measurements**

| Category                           | Probes | CDS probes* | 5'UTR probes | 3'UTR probes | Genes |
|------------------------------------|--------|-------------|--------------|--------------|-------|
| All probes                         | 693765 | -           | -            | -            | -     |
| Probes mapped to human genome      | 680139 | 504332      | 55497        | 77242        | 24427 |
| Probes mapped to chimpanzee genome | 508073 | -           | -            | -            | -     |
| Probes mapped to macaque genome    | 241363 | -           | -            | -            | -     |
| Probes mapped to three genomes     | 209310 | 172072      | 11950        | 17189        | 19222 |
| Detected in PFC                    | 157072 | 129821      | 8683         | 13529        | 12447 |
| Detected in CBC                    | 159029 | 131454      | 8648         | 13487        | 12853 |
| Age-related genes in PFC           | 119403 | 99223       | 6338         | 10371        | 8613  |
| Age-related genes in CBC           | 111052 | 92408       | 5831         | 9382         | 7988  |
| M1 in PFC                          | 2728   | 2205        | 164          | 264          | 184   |
| M2 in PFC                          | 2454   | 2070        | 106          | 174          | 152   |
| M3 in PFC                          | 1783   | 1436        | 107          | 174          | 117   |
| M4 in PFC                          | 686    | 594         | 21           | 52           | 44    |
| M5 in PFC                          | 694    | 600         | 28           | 60           | 43    |
| M1 in CBC                          | 1232   | 1034        | 83           | 81           | 77    |
| M2 in CBC                          | 1080   | 919         | 52           | 67           | 71    |

\* The probes mapped to each gene's CDS, 5'UTR, or 3'UTR region are defined based on human Ensembl annotation (version 54).



**Table S7 Numbers of sequence reads**

| Dataset | Brain Region | Species    | Age     | Total read pairs<br>/reads* | Mapped read pairs<br>/reads** |
|---------|--------------|------------|---------|-----------------------------|-------------------------------|
| 1       | PFC          | human      | newborn | 12986849                    | 11201196                      |
| 1       | PFC          | human      | young   | 10867452                    | 9701436                       |
| 1       | PFC          | human      | old     | 14164681                    | 11924785                      |
| 1       | PFC          | chimpanzee | newborn | 14769618                    | 12078817                      |
| 1       | PFC          | chimpanzee | young   | 13339060                    | 11168502                      |
| 1       | PFC          | macaque    | newborn | 12154304                    | 10462467                      |
| 1       | PFC          | macaque    | young   | 13886464                    | 11564237                      |
| 1       | CBC          | human      | newborn | 14401087                    | 12005990                      |
| 1       | CBC          | human      | young   | 11454526                    | 9916738                       |
| 1       | CBC          | human      | old     | 12673390                    | 10272699                      |
| 1       | CBC          | chimpanzee | newborn | 13241671                    | 10362841                      |
| 1       | CBC          | chimpanzee | young   | 13613681                    | 11439778                      |
| 1       | CBC          | macaque    | newborn | 12902755                    | 10218202                      |
| 1       | CBC          | macaque    | young   | 12894566                    | 10829456                      |
| 2       | PFC          | human      | 2       | 21277649                    | 6091528                       |
| 2       | PFC          | human      | 4       | 21284713                    | 12168005                      |
| 2       | PFC          | human      | 19      | 20754409                    | 10852823                      |
| 2       | PFC          | human      | 34      | 23722421                    | 13465717                      |
| 2       | PFC          | human      | 94      | 23416250                    | 13482878                      |
| 2       | PFC          | human      | 204     | 22698303                    | 12883134                      |
| 2       | PFC          | human      | 443     | 23934412                    | 13388858                      |
| 2       | PFC          | human      | 787     | 17759057                    | 9763113                       |
| 2       | PFC          | human      | 5105    | 19901399                    | 10530823                      |
| 2       | PFC          | human      | 9277    | 23201284                    | 12425625                      |
| 2       | PFC          | human      | 19457   | 16019209                    | 8908398                       |
| 2       | PFC          | human      | 24090   | 20948595                    | 11819920                      |
| 2       | PFC          | human      | 32120   | 21032459                    | 12126368                      |
| 2       | PFC          | human      | 35770   | 20255260                    | 11991680                      |
| 2       | PFC          | chimpanzee | 12784   | 35416060                    | 24424709                      |
| 2       | PFC          | chimpanzee | 2313    | 39710284                    | 25801319                      |
| 2       | PFC          | chimpanzee | 4380    | 38093774                    | 25712276                      |
| 2       | PFC          | chimpanzee | 4415    | 38557113                    | 26315737                      |
| 2       | PFC          | chimpanzee | 16131   | 37653869                    | 24892859                      |
| 2       | PFC          | chimpanzee | 39      | 38457051                    | 24966833                      |
| 2       | PFC          | chimpanzee | 8       | 36272005                    | 25443043                      |
| 2       | PFC          | chimpanzee | 2920    | 35829591                    | 24025090                      |
| 2       | PFC          | chimpanzee | 9855    | 34651138                    | 22818348                      |
| 2       | PFC          | chimpanzee | 525     | 33650766                    | 23380267                      |
| 2       | PFC          | chimpanzee | 7       | 36037186                    | 24773786                      |
| 2       | PFC          | chimpanzee | 1       | 34551179                    | 23319711                      |

|   |     |            |       |          |          |
|---|-----|------------|-------|----------|----------|
| 2 | PFC | chimpanzee | 45    | 34495444 | 23955705 |
| 2 | PFC | chimpanzee | 0     | 33730466 | 22252447 |
| 2 | PFC | macaque    | 1     | 35647306 | 22680112 |
| 2 | PFC | macaque    | 1     | 36207576 | 20633109 |
| 2 | PFC | macaque    | 7     | 35368530 | 20571126 |
| 2 | PFC | macaque    | 16    | 33944540 | 19868284 |
| 2 | PFC | macaque    | 22    | 35150179 | 20191511 |
| 2 | PFC | macaque    | 153   | 36074539 | 21055294 |
| 2 | PFC | macaque    | 207   | 34525819 | 19902951 |
| 2 | PFC | macaque    | 310   | 31005239 | 17038410 |
| 2 | PFC | macaque    | 739   | 32143377 | 16755158 |
| 2 | PFC | macaque    | 1487  | 30998685 | 16250594 |
| 2 | PFC | macaque    | 3389  | 32106698 | 16927367 |
| 2 | PFC | macaque    | 5478  | 31450483 | 17026329 |
| 2 | PFC | macaque    | 8104  | 28942443 | 15187912 |
| 2 | PFC | macaque    | 9518  | 29315091 | 15315768 |
| 2 | PFC | macaque    | 10220 | 29042277 | 14643836 |

\* Total mapped read pairs were counted for Dataset1 and reads were counted for Dataset2.

\*\* For Dataset1, we require at least one read from a pair of reads to be mapped to the genome.

**Table S8. Functional characteristics of genes with human-specific expression**

| Region | Module |           | Function annotation                                                   | Observed | All  | p-value  |
|--------|--------|-----------|-----------------------------------------------------------------------|----------|------|----------|
| PFC    | M1     | KEGG      | Calcium signaling pathway                                             | 10       | 96   | 8.00E-03 |
|        |        |           | Neuroactive ligand-receptor interaction                               | 12       | 112  | 1.80E-04 |
|        |        |           | Long-term potentiation                                                | 6        | 46   | 3.50E-02 |
|        |        | GO        | Signal transduction                                                   | 74       | 1805 | 4.50E-05 |
|        |        |           | Small gtpase mediated signal transduction                             | 20       | 311  | 1.48E-02 |
|        |        |           | G-protein coupled receptor protein signaling pathway                  | 24       | 418  | 1.53E-02 |
|        |        |           | Calcium ion transport                                                 | 12       | 107  | 3.48E-03 |
|        |        |           | Gamma-aminobutyric acid signaling pathway                             | 5        | 17   | 2.21E-02 |
|        |        |           | Synaptic transmission                                                 | 20       | 231  | 2.44E-04 |
|        |        |           | Transport                                                             | 63       | 1635 | 5.48E-03 |
|        |        |           | Cell-cell signaling                                                   | 23       | 345  | 2.40E-03 |
|        |        |           | Cell communication                                                    | 85       | 2040 | 8.05E-07 |
|        |        |           | Ion transport                                                         | 26       | 480  | 1.89E-02 |
|        |        |           | Cation transport                                                      | 21       | 366  | 4.44E-02 |
|        |        |           | Regulation of synaptic transmission                                   | 10       | 78   | 6.22E-03 |
|        |        |           | Transmission of nerve impulse                                         | 22       | 268  | 1.60E-04 |
|        |        |           | Neuropeptide signaling pathway                                        | 7        | 34   | 6.86E-03 |
|        |        |           | Neurological system process                                           | 26       | 436  | 4.03E-03 |
|        |        |           | Regulation of cell communication                                      | 29       | 536  | 7.25E-03 |
|        |        |           | Establishment of localization                                         | 63       | 1646 | 6.77E-03 |
|        |        |           | Di-, tri-valent inorganic cation transport                            | 12       | 120  | 9.84E-03 |
|        |        | Cell type | Neurons                                                               | 48       | 793  | 2.47E-08 |
|        |        | Structure | Grey-matter                                                           | 71       | 794  | 9.31E-12 |
| PFC    | M2     | GO        | Nucleobase, nucleoside, nucleotide and nucleic acid metabolic process | 59       | 1990 | 1.11E-03 |
|        |        |           | RNA metabolic process                                                 | 41       | 1239 | 5.95E-03 |
|        |        |           | Nitrogen compound metabolic process                                   | 61       | 2191 | 5.44E-03 |
|        |        | Structure | White-matter                                                          | 6        | 406  | 1.63E-02 |
| PFC    | M3     | KEGG      | Regulation of actin cytoskeleton                                      | 7        | 107  | 2.07E-03 |
|        |        |           | Axon guidance                                                         | 6        | 87   | 4.09E-03 |
|        |        | GO        | Cell differentiation                                                  | 28       | 793  | 1.54E-03 |
|        |        |           | Multicellular organismal development                                  | 39       | 1399 | 4.17E-03 |
|        |        |           | Neuron projection development                                         | 15       | 190  | 3.26E-05 |
|        |        |           | Cell motion                                                           | 15       | 319  | 1.28E-02 |
|        |        |           | Cell morphogenesis                                                    | 18       | 269  | 1.88E-05 |
|        |        |           | Anatomical structure morphogenesis                                    | 24       | 618  | 1.71E-03 |
|        |        |           | Nervous system development                                            | 29       | 616  | 2.84E-06 |
|        |        |           | Axonogenesis                                                          | 13       | 141  | 4.32E-05 |
|        |        |           | Neuron development                                                    | 17       | 198  | 1.45E-06 |
|        |        |           | Neurogenesis                                                          | 22       | 316  | 2.95E-07 |
|        |        |           | Generation of neurons                                                 | 21       | 287  | 3.17E-07 |
|        |        |           | Neuron projection morphogenesis                                       | 13       | 162  | 1.88E-04 |
|        |        |           | Neuron differentiation                                                | 20       | 256  | 2.82E-07 |
|        |        |           | Cell development                                                      | 23       | 458  | 4.01E-05 |

|            |           |           |                                                       |    |      |          |
|------------|-----------|-----------|-------------------------------------------------------|----|------|----------|
|            |           |           | Cell morphogenesis involved in neuron differentiation | 13 | 152  | 9.61E-05 |
|            |           |           | Cell projection organization                          | 18 | 263  | 1.37E-05 |
|            |           |           | Cell morphogenesis involved in differentiation        | 13 | 177  | 4.75E-04 |
|            |           |           | Anatomical structure development                      | 41 | 1274 | 5.37E-05 |
|            |           |           | Developmental process                                 | 44 | 1557 | 5.87E-04 |
|            |           | Cell type | Neurons                                               | 24 | 817  | 2.36E-03 |
|            |           | Structure | Grey-matter                                           | 25 | 840  | 7.79E-03 |
|            |           | GO        | Cell communication                                    | 21 | 2104 | 3.07E-03 |
|            |           |           | Regulation of cell                                    | 9  | 556  | 4.29E-02 |
|            |           | Structure | Grey-matter                                           | 17 | 848  | 1.26E-03 |
| <b>PFC</b> | <b>M5</b> | GO        | Regulation of synaptic transmission                   | 5  | 71   | 6.03E-02 |
|            |           |           | Regulation of membrane potential                      | 5  | 74   | 7.20E-02 |
| <b>CBC</b> | <b>M2</b> | GO        | Regulation of synaptic transmission                   | 5  | 71   | 6.03E-02 |
|            |           |           | Regulation of membrane potential                      | 5  | 74   | 7.20E-02 |

*Observed:* number of genes that overlap between specific gene set and module

*All:* number of genes that overlap between specific gene set and all age-related genes

*p-value:* hypergeometric test p-value after Bonferroni correction for multiple testing.

**Table S9. Correlation between neurotransmitter profiles and PFC Module 1 profiles or brain mass changes with age.**

|                                               |                | Neurotransmitters |              |             |
|-----------------------------------------------|----------------|-------------------|--------------|-------------|
|                                               |                | Glutamate         | GABA         | Aspartate   |
| Brain Mass*                                   | Whole lifespan | -0.17             | -0.06        | 0.17        |
|                                               | Development*** | -0.16             | 0.03         | 0.23        |
| PFC M1*                                       | Whole lifespan | 0.18              | <b>-0.30</b> | <b>0.30</b> |
|                                               | Development    | <b>0.47</b>       | 0.05         | <b>0.60</b> |
| PFC M1**<br>(Remove the effect of Brain Mass) | Whole lifespan | 0.23              | -0.29        | 0.27        |
|                                               | Development    | <b>0.51</b>       | 0.05         | <b>0.59</b> |

\* The Pearson correlation coefficients were calculated using 15 interpolated points across cubic spline curves per species, or among all species. Significant results are shown in bold (Pearson test  $p < 0.05$ ).

\*\* The partial correlation analysis (Kim and Yi 2007) was used to calculate the correlation between age-related neurotransmitter concentration and the PFC M1 mean expression after removing the effect of brain growth. Significant correlation coefficients from the partial correlation analysis are shown in bold ( $p < 0.05$ ).

\*\*\* Here we used human samples with age < 20 years, chimpanzee < 10 years, macaque < 5 years.

**Table S10. Overlap of species-specific genes and genes response in neuronal activity.**

| 1. Species-specific gene sets in PFC and CBC       |                |        |             |          |             |          |               |          |             |          |             |          |               |          |
|----------------------------------------------------|----------------|--------|-------------|----------|-------------|----------|---------------|----------|-------------|----------|-------------|----------|---------------|----------|
| Stimulus                                           | Category       | Number | PFC         |          |             |          |               |          | CBC         |          |             |          |               |          |
|                                                    |                |        | human (702) |          | chimp. (55) |          | macaque (239) |          | human (260) |          | chimp. (82) |          | macaque (460) |          |
|                                                    |                |        | num         | p-value  | num         | p-value  | num           | p-value  | num         | p-value  | num         | p-value  | num           | p-value  |
| BIC                                                | up-regulated   | 336    | 31          | 3.16E-04 | 1           | 7.24E-01 | 6             | 6.33E-01 | 12          | 2.11E-02 | 1           | 8.63E-01 | 9             | 5.62E-01 |
| KCl                                                | up-regulated   | 947    | 75          | 2.58E-03 | 5           | 5.13E-01 | 17            | 6.83E-01 | 34          | 1.75E-03 | 3           | 9.37E-01 | 35            | 3.81E-01 |
| BIC                                                | down-regulated | 117    | 8           | 1.33E-01 | 1           | 3.30E-01 | 6             | 1.47E-02 | 2           | 5.52E-01 | 0           | 1.00E+00 | 2             | 7.55E-01 |
| KCl                                                | down-regulated | 769    | 31          | 9.46E-01 | 1           | 9.64E-01 | 11            | 7.56E-01 | 4           | 1.00E+00 | 4           | 6.09E-01 | 21            | 8.17E-01 |
| 2. Five human-specific expression Modules in PFC   |                |        |             |          |             |          |               |          |             |          |             |          |               |          |
| Stimulus                                           | Category       | Number | M1 (184)    |          | M2 (152)    |          | M3 (117)      |          | M4 (44)     |          | M5 (43)     |          |               |          |
|                                                    |                |        | num         | p-value  | num         | p-value  | num           | p-value  | num         | p-value  | num         | p-value  |               |          |
| BIC                                                | up-regulated   | 336    | 13          | 7.89E-05 | 2           | 9.19E-01 | 7             | 2.80E-02 | 0           | 1.00E+00 | 0           | 1.00E+00 |               |          |
| KCl                                                | up-regulated   | 947    | 24          | 1.05E-02 | 11          | 6.13E-01 | 19            | 3.71E-03 | 7           | 7.73E-02 | 1           | 9.66E-01 |               |          |
| BIC                                                | down-regulated | 117    | 6           | 1.36E-03 | 0           | 1.00E+00 | 2             | 2.36E-01 | 0           | 1.00E+00 | 0           | 1.00E+00 |               |          |
| KCl                                                | down-regulated | 769    | 7           | 9.13E-01 | 2           | 9.98E-01 | 7             | 6.13E-01 | 3           | 5.57E-01 | 3           | 4.06E-01 |               |          |
| num: number of overlap genes between two gene sets |                |        |             |          |             |          |               |          |             |          |             |          |               |          |
| p-value: one-sided Fisher's exact test             |                |        |             |          |             |          |               |          |             |          |             |          |               |          |

**Table S11. List of Module 1 genes that are up-regulated by neuronal activation.**

| <b>Stimulus</b> | <b>Ensemble Gene ID</b> | <b>HGNC ID</b>   | <b>Description</b>                                                         |
|-----------------|-------------------------|------------------|----------------------------------------------------------------------------|
| BIC             | ENSG00000197991         | <i>PCDH20</i>    | Protocadherin-20 Precursor                                                 |
| BIC             | ENSG00000198838         | <i>RYR3</i>      | Ryanodine receptor 3                                                       |
| BIC             | ENSG00000168702         | <i>LRP1B</i>     | Low-density lipoprotein receptor-related protein 1B Precursor              |
| BIC             | ENSG00000169271         | <i>HSPB3</i>     | Heat shock protein beta-3                                                  |
| BIC             | ENSG00000185053         | <i>SGCZ</i>      | Zeta-sarcoglycan                                                           |
| BIC             | ENSG00000078725         | <i>DBC1</i>      | Deleted in bladder cancer protein 1 Precursor                              |
| BIC             | ENSG00000133019         | <i>CHRM3</i>     | Muscarinic acetylcholine receptor M3                                       |
| BIC             | ENSG00000176697         | <i>BDNF</i>      | Brain-derived neurotrophic factor Precursor                                |
| BIC             | ENSG00000058335         | <i>RASGRF1</i>   | Ras-specific guanine nucleotide-releasing factor 1                         |
| BIC             | ENSG00000115896         | <i>PLCL1</i>     | Inactive phospholipase C-like protein 1                                    |
| BIC             | ENSG00000138411         | <i>HECW2</i>     | E3 ubiquitin-protein ligase HECW2                                          |
| BIC             | ENSG00000163285         | <i>GABRG1</i>    | Gamma-aminobutyric acid receptor subunit gamma-1 Precursor                 |
| BIC             | ENSG00000147724         | <i>FAM135B</i>   | Protein FAM135B                                                            |
| KCl             | ENSG00000060140         | <i>STYK1</i>     | Tyrosine-protein kinase STYK1                                              |
| KCl             | ENSG00000197991         | <i>PCDH20</i>    | Protocadherin-20 Precursor                                                 |
| KCl             | ENSG00000198838         | <i>RYR3</i>      | Ryanodine receptor 3                                                       |
| KCl             | ENSG00000138028         | <i>CGREF1</i>    | Cell growth regulator with EF hand domain protein 1                        |
| KCl             | ENSG00000168702         | <i>LRP1B</i>     | Low-density lipoprotein receptor-related protein 1B Precursor              |
| KCl             | ENSG00000169271         | <i>HSPB3</i>     | Heat shock protein beta-3                                                  |
| KCl             | ENSG00000152932         | <i>RAB3C</i>     | Ras-related protein Rab-3C                                                 |
| KCl             | ENSG00000006128         | <i>TAC1</i>      | Protachykinin-1 Precursor                                                  |
| KCl             | ENSG00000078725         | <i>DBC1</i>      | Deleted in bladder cancer protein 1 Precursor                              |
| KCl             | ENSG00000162631         | <i>NTNG1</i>     | Netrin-G1 Precursor                                                        |
| KCl             | ENSG00000133019         | <i>CHRM3</i>     | Muscarinic acetylcholine receptor M3                                       |
| KCl             | ENSG00000176697         | <i>BDNF</i>      | Brain-derived neurotrophic factor Precursor                                |
| KCl             | ENSG00000139645         | <i>ANKRD52</i>   | Serine/threonine-protein phosphatase 6 regulatory ankyrin repeat subunit C |
| KCl             | ENSG00000166068         | <i>SPRED1</i>    | Sprouty-related, EVH1 domain-containing protein 1                          |
| KCl             | ENSG00000058335         | <i>RASGRF1</i>   | Ras-specific guanine nucleotide-releasing factor 1                         |
| KCl             | ENSG00000131242         | <i>RAB11FIP4</i> | Rab11 family-interacting protein 4                                         |
| KCl             | ENSG00000162975         | <i>KCNF1</i>     | Potassium voltage-gated channel subfamily F member 1                       |
| KCl             | ENSG00000115896         | <i>PLCL1</i>     | Inactive phospholipase C-like protein 1                                    |
| KCl             | ENSG00000138411         | <i>HECW2</i>     | E3 ubiquitin-protein ligase HECW2                                          |
| KCl             | ENSG00000163285         | <i>GABRG1</i>    | Gamma-aminobutyric acid receptor subunit gamma-1 Precursor                 |
| KCl             | ENSG00000151834         | <i>GABRA2</i>    | Gamma-aminobutyric acid receptor subunit alpha-2 Precursor                 |
| KCl             | ENSG00000183775         | <i>KCTD16</i>    | BTB/POZ domain-containing protein KCTD16                                   |
| KCl             | ENSG00000185345         | <i>PARK2</i>     | E3 ubiquitin-protein ligase parkin                                         |
| KCl             | ENSG00000147724         | <i>FAM135B</i>   | Protein FAM135B                                                            |

**Table S12 Correlations between expression profiles of neuron-, synapse-, and MEF2A- related genes and PFC Module 1 genes.**

| Gene set   | Description                         | PFC     |        | CBC    |        |
|------------|-------------------------------------|---------|--------|--------|--------|
|            |                                     | PFC M1* | Others | PFC M1 | Others |
| Neuron     | Neuron-specific genes               | 0.039   | -0.004 | -0.022 | -0.024 |
| Neuron.exp | Genes highly expressed in neurons   | -0.011  | 0.004  | 0.025  | 0.048  |
| Synapse    | Synapse-related genes               | 0.134   | -0.004 | 0.021  | 0.034  |
| MEF2A.exp  | Activity-dependent targets of MEF2A | 0.300   | -0.035 | 0.002  | 0.098  |
| MEF2A.pre  | MEF2A predicted targets             | 0.138   | -0.010 | 0.028  | 0.038  |

\* The Pearson correlation coefficients were calculated using 15 interpolated points across cubic spline curves per species (Supplementary Information). The table shows the median correlation coefficient between each gene per gene set and each PFC Module 1 gene (PFC M1) or non-PFC Module 1 gene (Others).



## Supplementary references

- Ashburner M, Ball CA, Blake JA, Botstein D, Butler H, Cherry JM, Davis AP, Dolinski K, Dwight SS, Eppig JT et al. 2000. Gene Ontology: tool for the unification of biology. *Nat Genet* **25**(1): 25-29.
- Cahoy JD, Emery B, Kaushal A, Foo LC, Zamanian JL, Christopherson KS, Xing Y, Lubischer JL, Krieg PA, Krupenko SA et al. 2008. A transcriptome database for astrocytes, neurons, and oligodendrocytes: a new resource for understanding brain development and function. *J Neurosci* **28**(1): 264-278.
- Clancy B, Darlington RB, Finlay BL. 2001. Translating developmental time across mammalian species. *Neuroscience* **105**(1): 7-17.
- de Magalhães J, Costa J. 2009. A database of vertebrate longevity records and their relation to other life-history traits. *J Evol Biol* **22**(8): 1770-1774.
- Erraji-Benchekroun L, Underwood MD, Arango V, Galfalvy H, Pavlidis P, Smyrniotopoulos P, Mann JJ, Sibille E. 2005. Molecular aging in human prefrontal cortex is selective and continuous throughout adult life. *Biol Psychiatry* **57**(5): 549.
- Faraway J. 2002. Practical Regression and ANOVA Using R. Available at: <http://cran.rproject.org/doc/contrib/Faraway-PRA.pdf>.
- Flavell SW, Kim TK, Gray JM, Harmin DA, Hemberg M, Hong EJ, Markenscoff-Papadimitriou E, Bear DM, Greenberg ME. 2008. Genome-wide analysis of MEF2 transcriptional program reveals synaptic target genes and neuronal activity-dependent polyadenylation site selection. *Neuron* **60**(6): 1022-1038.
- Fu X, Fu N, Guo S, Yan Z, Xu Y, Hu H, Menzel C, Chen W, Li Y, Zeng R et al. 2009. Estimating accuracy of RNA-Seq and microarrays with proteomics. *BMC Genomics* **10**: 161.
- Fu X, Giavalisco P, Liu X, Catchpole G, Fu N, Ning ZB, Guo S, Yan Z, Somel M, Pääbo S et al. 2011. Rapid metabolic evolution in human prefrontal cortex. *Proc Natl Acad Sci U S A* **108**(15): 6181-6186.
- Gautier L, Cope L, Bolstad BM, Irizarry RA. 2004. affy--analysis of Affymetrix GeneChip data at the probe level. *Bioinformatics* **20**(3): 307-315.
- Glantz LA, Gilmore JH, Hamer RM, Lieberman JA, Jarskog LF. 2007. Synaptophysin and postsynaptic density protein 95 in the human prefrontal cortex from mid-gestation into early adulthood. *Neuroscience* **149**(3): 582-591.
- Green RE, Krause J, Briggs AW, Maricic T, Stenzel U, Kircher M, Patterson N, Li H, Zhai W, Fritz MH et al. 2010. A draft sequence of the Neandertal genome. *Science* **328**(5979): 710-722.
- Haygood R, Fedrigo O, Hanson B, Yokoyama K, Wray GA. 2007. Promoter regions of many neural- and nutrition-related genes have experienced positive selection during human evolution. *Nat Genet* **39**(9): 1140-1144.
- Hinds DA, Stuve LL, Nilsen GB, Halperin E, Eskin E, Ballinger DG, Frazer KA, Cox DR. 2005. Whole-genome patterns of common DNA variation in three human populations. *Science* **307**(5712): 1072-1079.
- Hubbard TJP, Aken BL, Beal K, Ballester B, Caccamo M, Chen Y, Clarke L, Coates G, Cunningham F, Cutts T et al. 2007. Ensembl 2007. *Nucl Acids Res* **35**(suppl\_1): D610-617.

- Kanehisa M, Araki M, Goto S, Hattori M, Hirakawa M, Itoh M, Katayama T, Kawashima S, Okuda S, Tokimatsu T et al. 2008. KEGG for linking genomes to life and the environment. *Nucleic Acids Res* **36**(Database issue): D480-484.
- Karolchik D, Kuhn RM, Baertsch R, Barber GP, Clawson H, Diekhans M, Giardine B, Harte RA, Hinrichs AS, Hsu F et al. 2008. The UCSC Genome Browser Database: 2008 update. *Nucleic Acids Res* **36**(Database issue): D773-779.
- Kel AE, Gössling E, Reuter I, Cheremushkin E, Kel-Margoulis OV, Wingender E. 2003. MATCH: A tool for searching transcription factor binding sites in DNA sequences. *Nucleic Acids Res* **31**(13): 3576-3579.
- Khaitovich P, Hellmann I, Enard W, Nowick K, Leinweber M, Franz H, Weiss G, Lachmann M, Pääbo S. 2005. Parallel Patterns of Evolution in the Genomes and Transcriptomes of Humans and Chimpanzees. *Science* **309**(5742): 1850-1854.
- Kim SH, Yi SV. 2007. Understanding relationship between sequence and functional evolution in yeast proteins. *Genetica* **131**(2): 151-156.
- Langmead B, Trapnell C, Pop M, Salzberg SL. 2009. Ultrafast and memory-efficient alignment of short DNA sequences to the human genome. *Genome Biol* **10**(3): R25.
- Leigh S. 2004. Brain growth, life history, and cognition in primate and human evolution. *Am J Primatol* **62**(3): 139-164.
- Lu L, Airey DC, Williams RW. 2001. Complex trait analysis of the hippocampus: mapping and biometric analysis of two novel gene loci with specific effects on hippocampal structure in mice. *J Neurosci* **21**(10): 3503-3514.
- Mortazavi A, Williams BA, McCue K, Schaeffer L, Wold B. 2008. Mapping and quantifying mammalian transcriptomes by RNA-Seq. *Nat Meth* **5**(7): 621-628.
- Shupe JM, Kristan DM, Austad SN, Stenkamp DL. 2006. The eye of the laboratory mouse remains anatomically adapted for natural conditions. *Brain Behav Evol* **67**(1): 39-52.
- Siepel A, Bejerano G, Pedersen JS, Hinrichs AS, Hou M, Rosenbloom K, Clawson H, Spieth J, Hillier LW, Richards S et al. 2005. Evolutionarily conserved elements in vertebrate, insect, worm, and yeast genomes. *Genome Res* **15**(8): 1034-1050.
- Smith BH, Crummett TL, Brandt KL. 1994. Ages of eruption of primate teeth: A compendium for aging individuals and comparing life histories. *Am J Phys Anthropol* **37**(S19): 177-231.
- Sokal RR, Rohlf FJ. 1995. *Biometry*. Freeman, New York.
- Somel M, Franz H, Yan Z, Lorenc A, Guo S, Giger T, Kelso J, Nickel B, Dannemann M, Bahn S et al. 2009. Transcriptional neoteny in the human brain. *Proc Natl Acad Sci U S A* **106**(14): 5743-5748.
- Somel M, Guo S, Fu N, Yan Z, Hu HY, Xu Y, Yuan Y, Ning Z, Hu Y, Menzel C et al. 2010. MicroRNA, mRNA, and protein expression link development and aging in human and macaque brain. *Genome Res* **20**(9): 1207-1218.
- Trapnell, Williams, Pertea, Mortazavi, Kwan, Baren v, Salzberg, Wold, Pachter. 2010. Transcript assembly and abundance estimation from RNA-Seq reveals thousands of new transcripts and switching among isoforms.
- Trapnell C, Pachter L, Salzberg SL. 2009. TopHat: discovering splice junctions with RNA-Seq. *Bioinformatics* **25**(9): 1105-1111.

- Xie X, Lu J, Kulbokas EJ, Golub TR, Mootha V, Lindblad-Toh K, Lander ES, Kellis M. 2005. Systematic discovery of regulatory motifs in human promoters and 3' UTRs by comparison of several mammals. *Nature* **434**(7031): 338.
- Yuan Y, Chen YP, Ni S, Xu AG, Tang L, Vingron M, Somel M, Khaitovich P. 2011. Development and application of a modified dynamic time warping algorithm (DTW-S) to analyses of primate brain expression time series. *BMC Bioinformatics* **12**(1): 347.
